# Supplementary material for: Climatology of the terms and variables of transformed Eulerian-mean (TEM) equations from multiple reanalyses: MERRA-2, JRA-55, ERA-Interim, and CFSR
Source: Copernicus journal article supplement (doi:10.5194/acp-24-7873-2024), 2024-07-10

JJA (81–10)

ERA–Int

(a)  $T$  [K]

(b)  $\Theta$  [K]

(c)  $u$  [m/s]

(d)  $v_{res}$  [m/s]

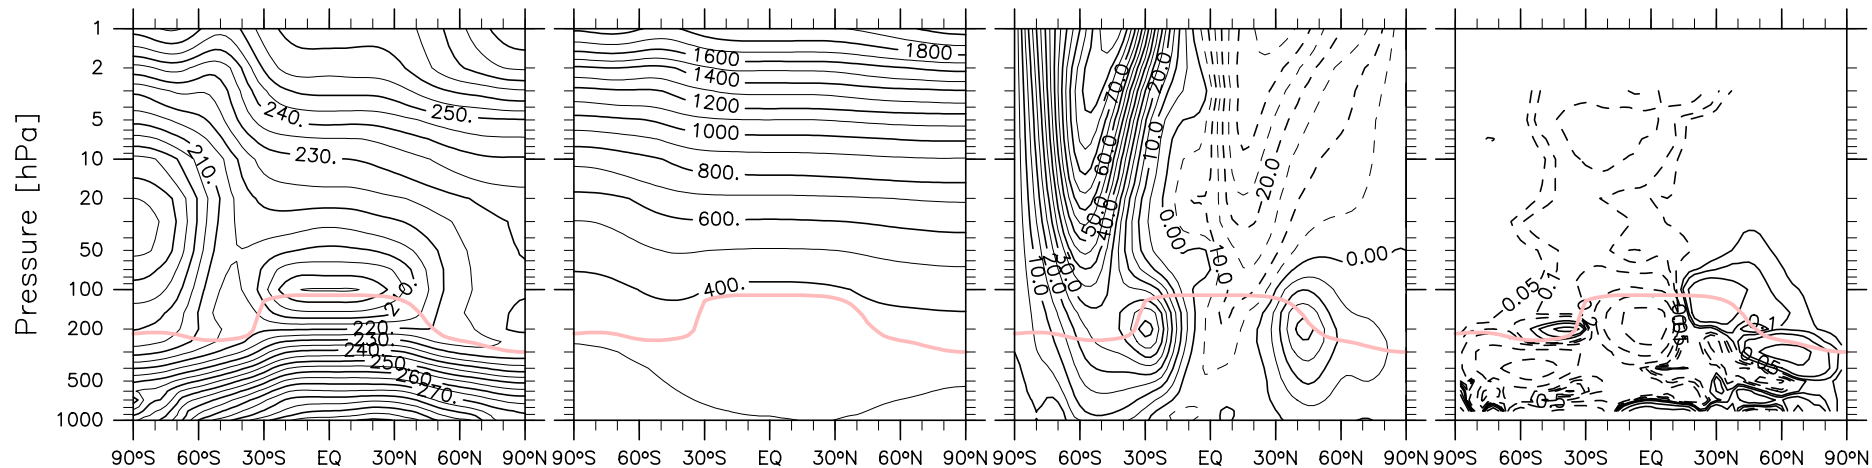

(e)  $w_{res}$  [mm/s]

(f)  $w_{res}$  from  $\Psi_{vres}$  [mm/s]

(g)  $\Psi_{vres}$  [kg/m/s]

(h)  $\Psi_{wres}$  [kg/m/s]

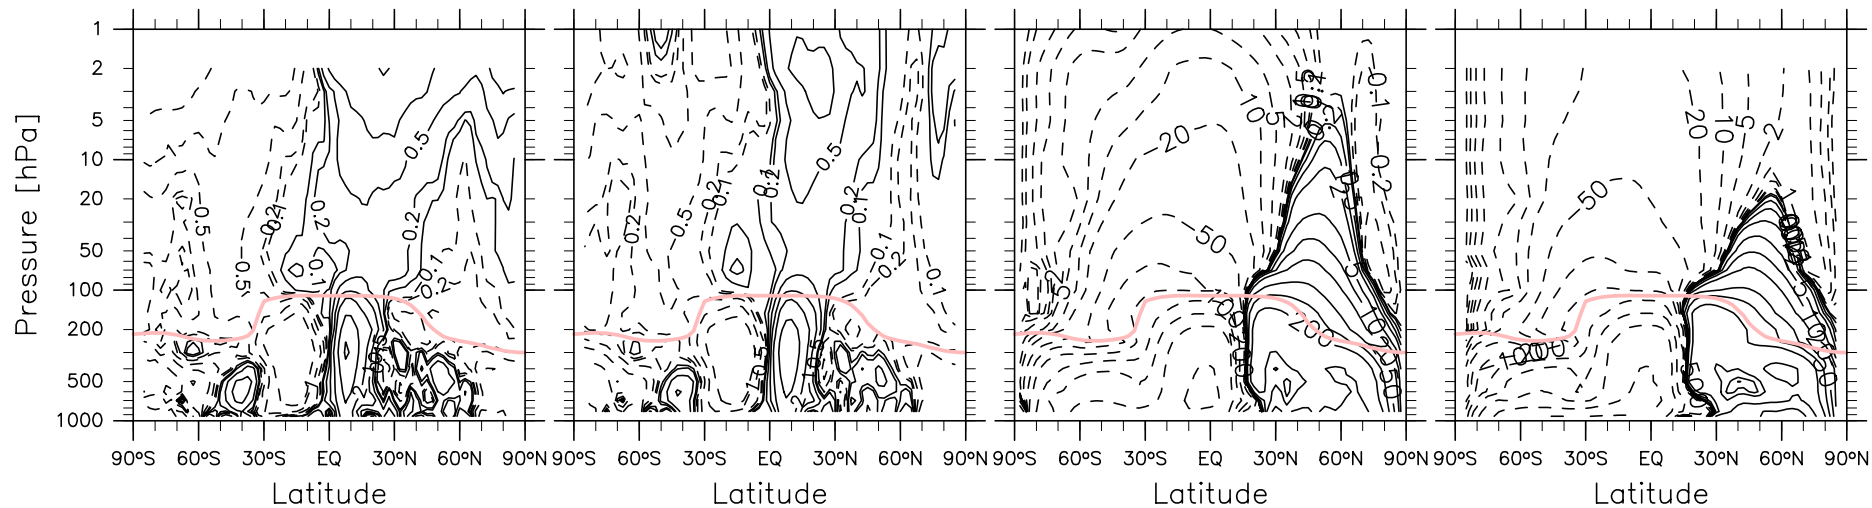

JJA (81–10)

ERA–Int

(a)  $w_{\text{res}}$  [mm/s]

(b)  $w_{\text{res}}$  from  $\psi_{\text{vres}}$  [mm/s]

(c)  $\omega_{\text{res}}$  [mPa/s]

(d)  $\omega_{\text{res}}$  from  $\psi_{\text{vres}}$  [mPa/s]

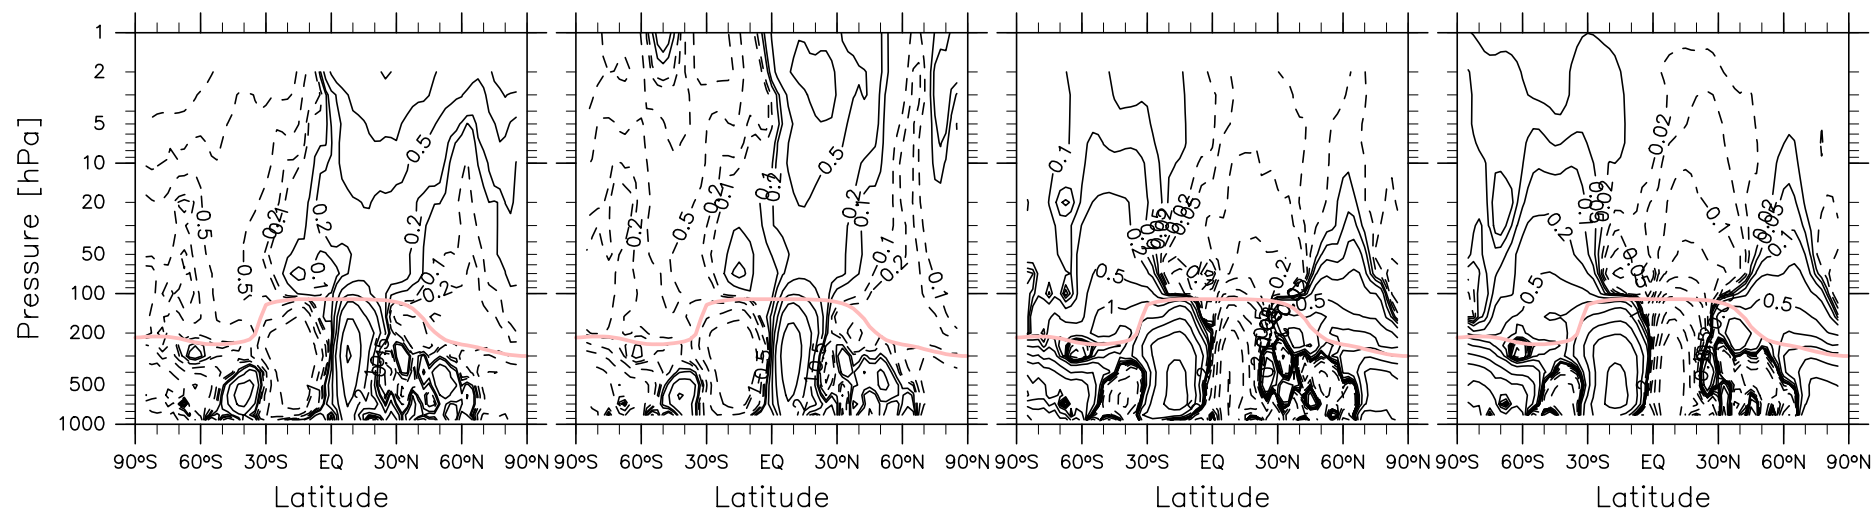

JJA (81–10)

ERA–Int

(a)  $Q_{\text{total}}$  [K/d]

(b)  $Q_{\text{longwave}}$  [K/d]

(c)  $Q_{\text{shortwave}}$  [K/d]

(d)  $Q_{\text{total}} - Q_{\text{rad}}$  [K/d]

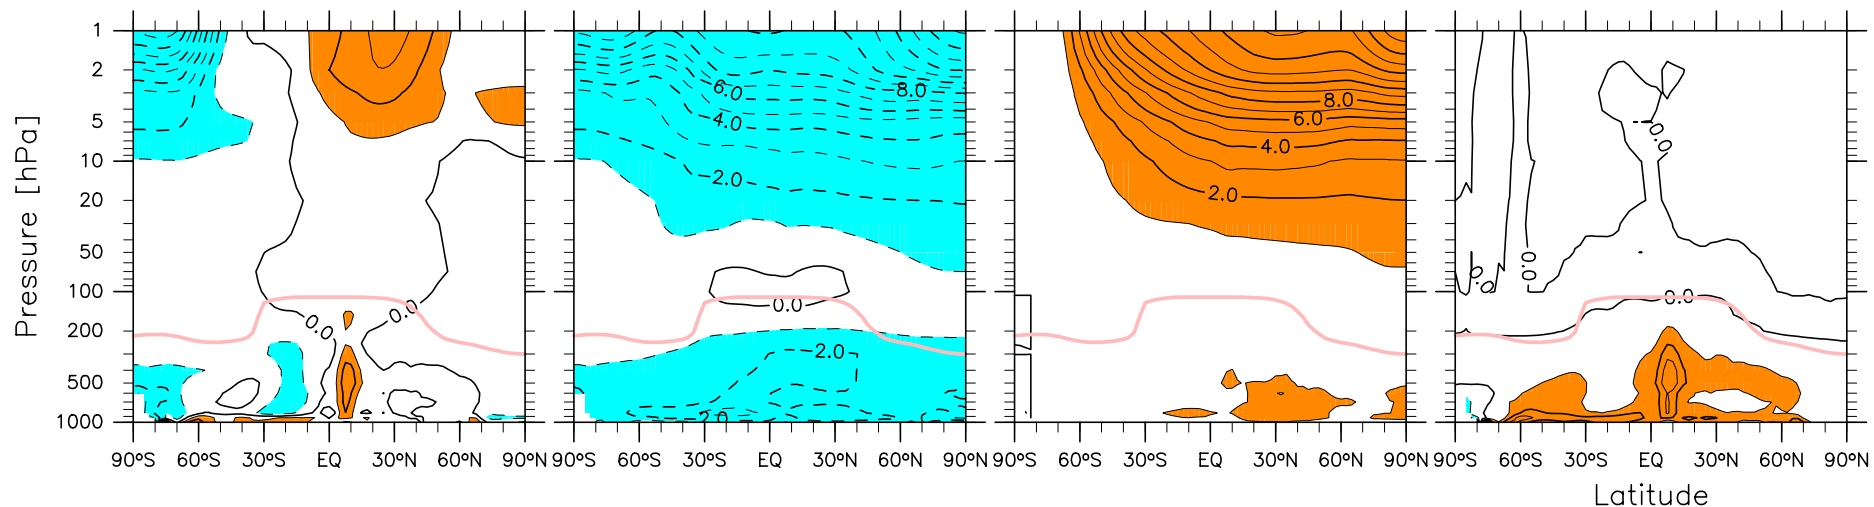

(e) Global–mean  $Q_s$  [K/d]

(f) Ozone [ppmv]

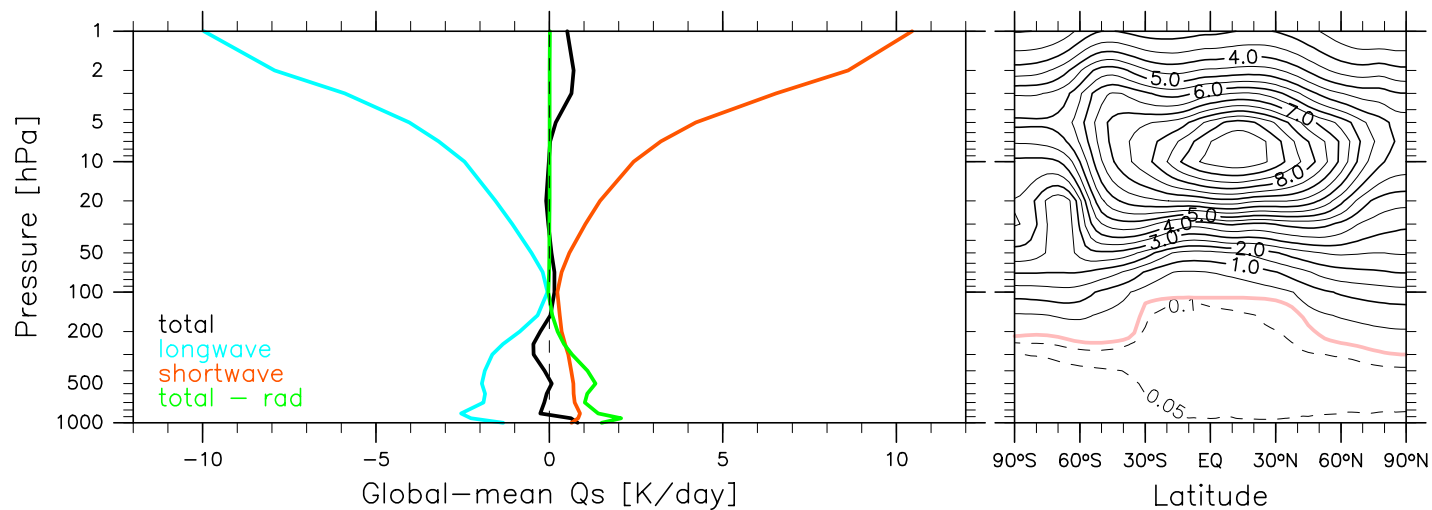

JJA (81–10)

ERA–Int

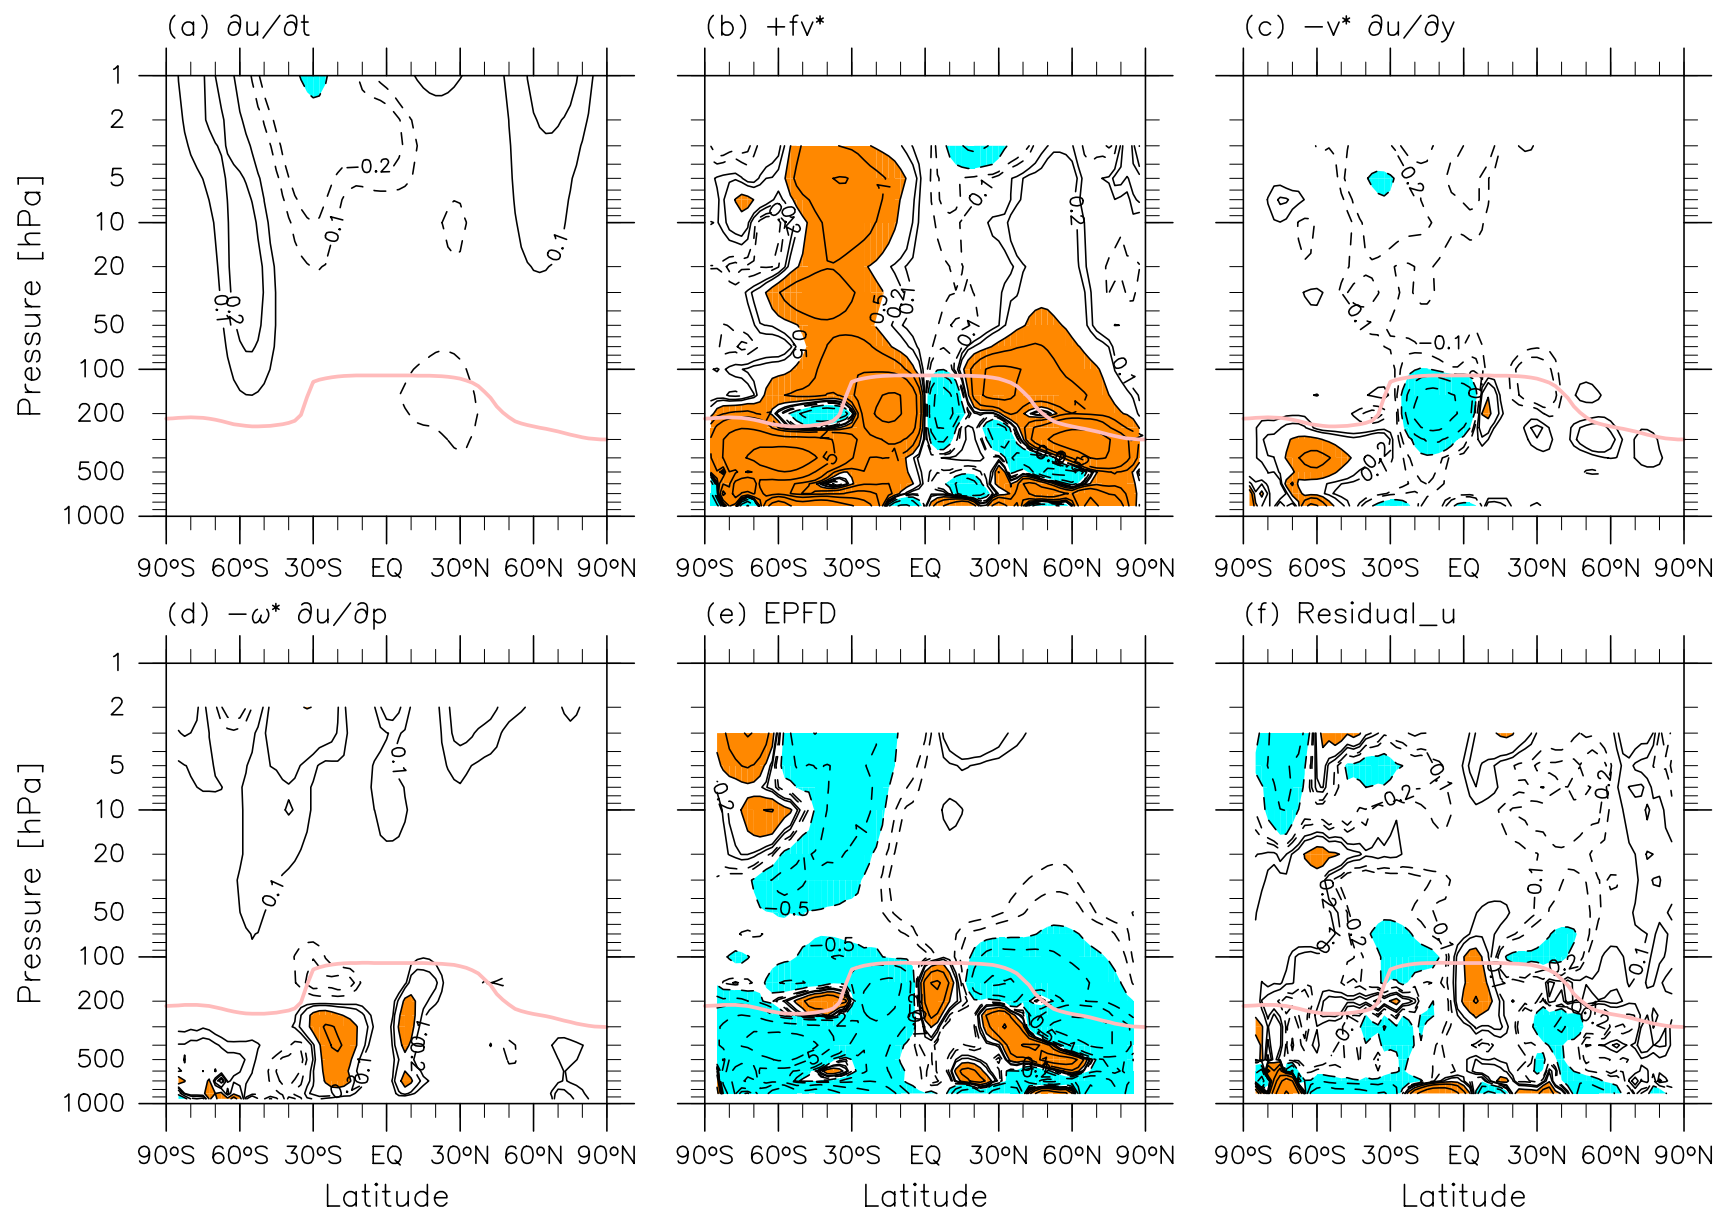

JJA (81–10)

(a)  $\partial u / \partial t$

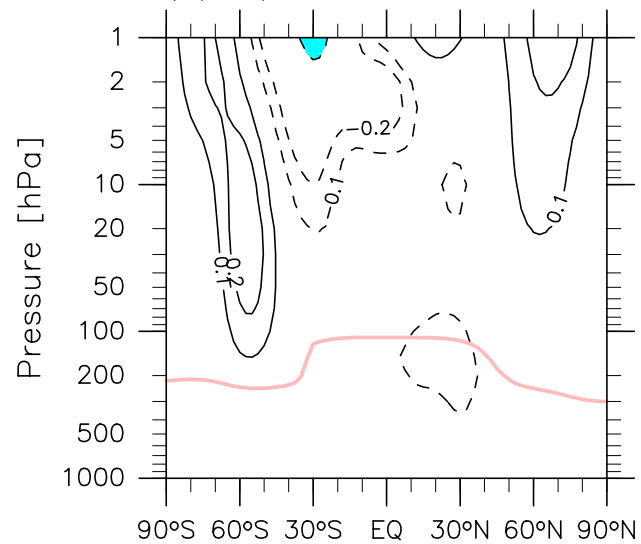

ERA-Int

(b)  $+fv^* - v^* \partial u / \partial y - \omega^* \partial u / \partial p$

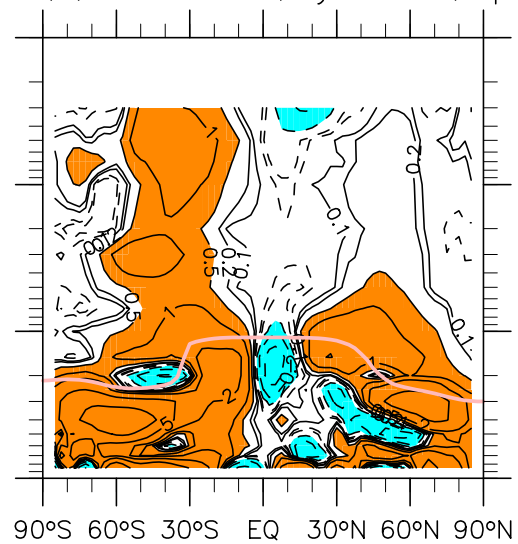

(c) EPFD

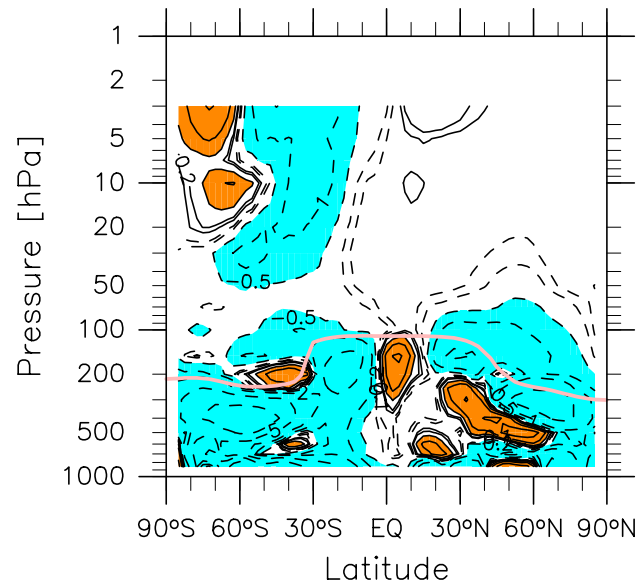

(d) Residual\_u

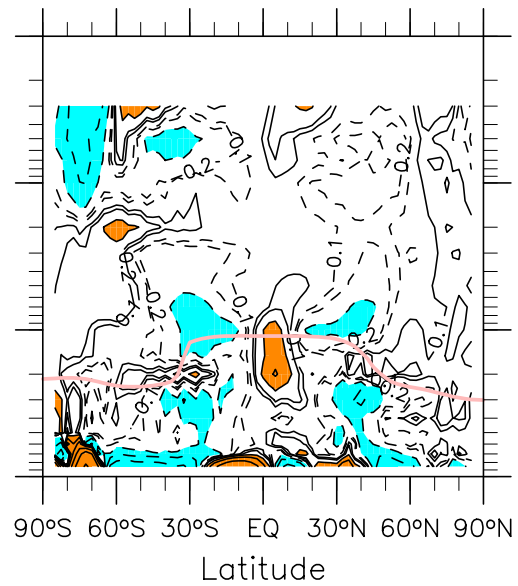

JJA (81–10)

ERA–Int

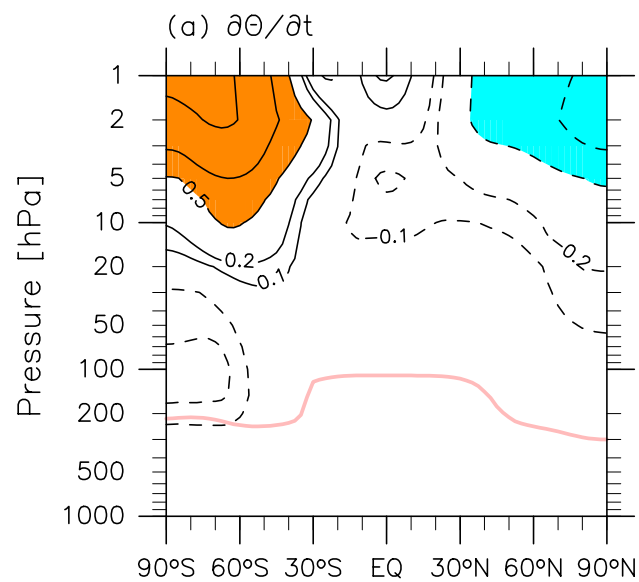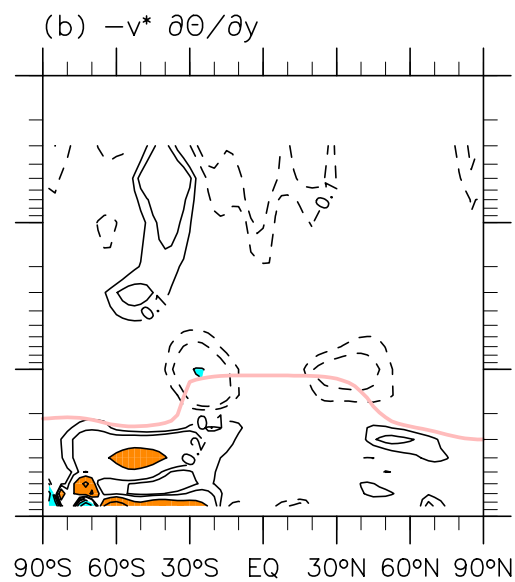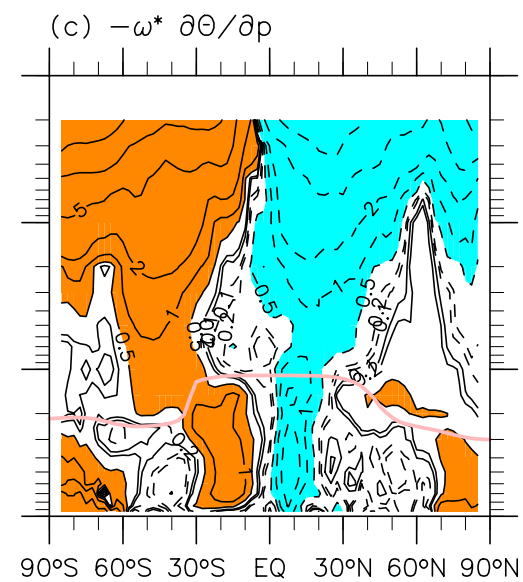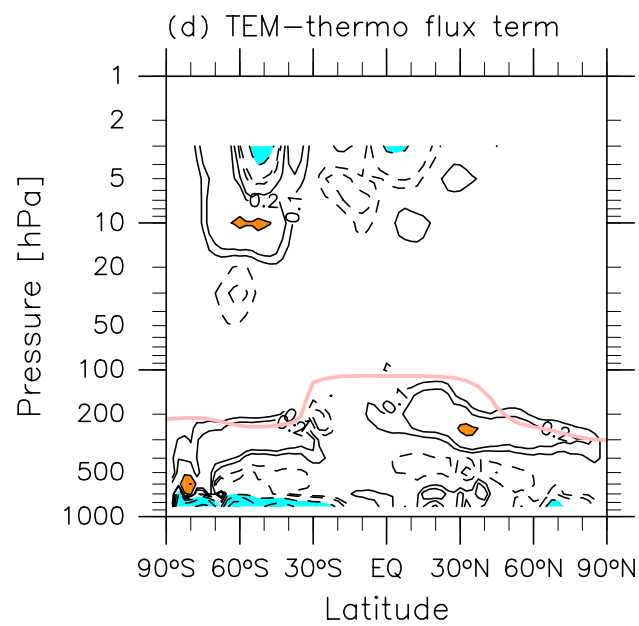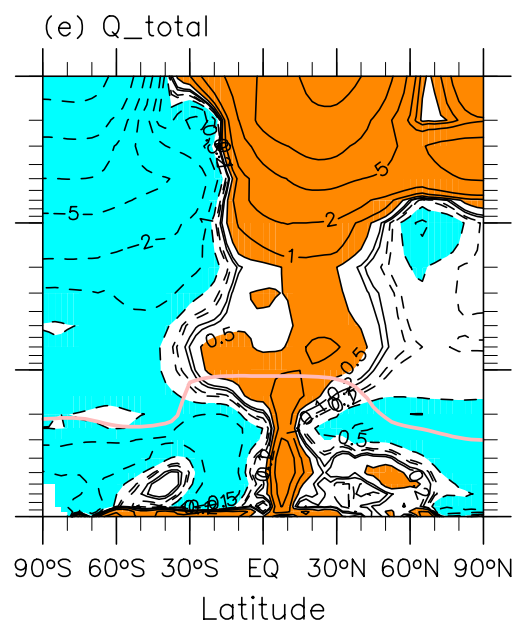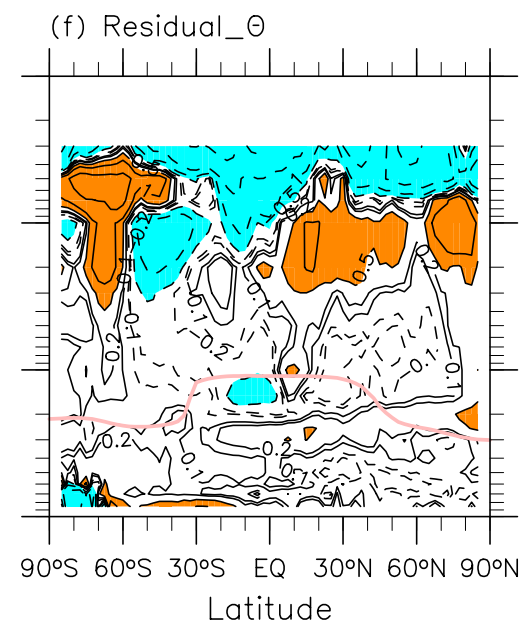

JJA (81–10)

(a) Residual\_θ (TEM)

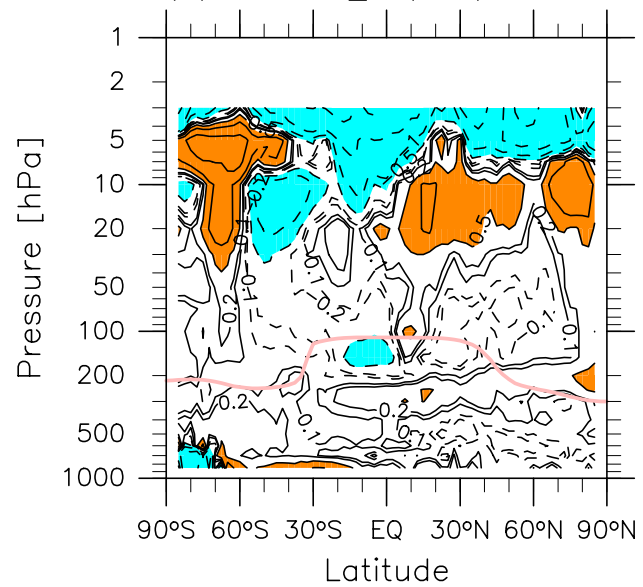

(b) Residual\_θ (EM)

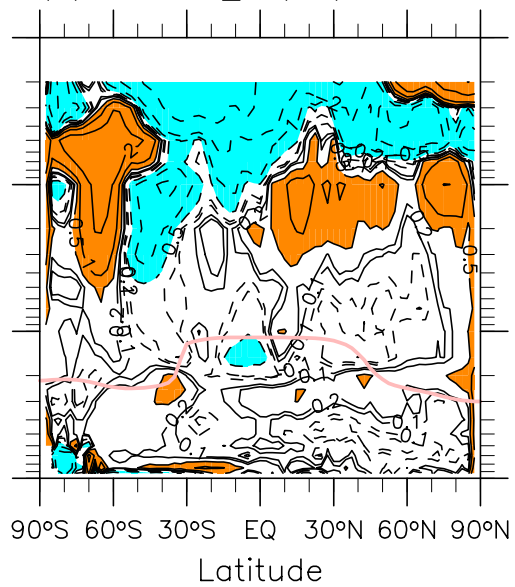

ERA–Int

(c) difference (TEM minus EM)

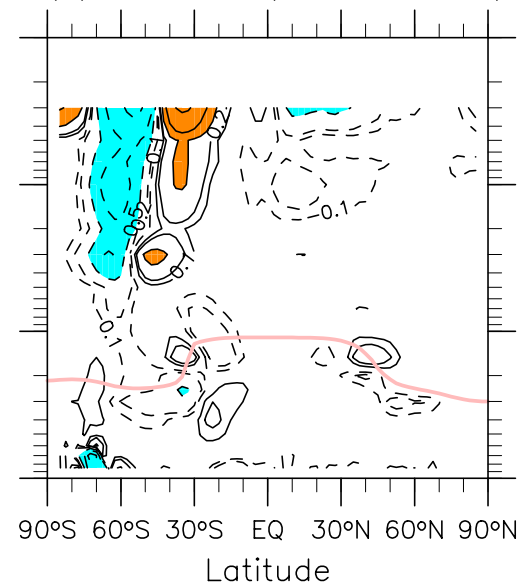

Supplement: Supplementary file 18 [file acp-24-7873-2024-supplement.zip]
