# Supplementary material for: Climatology of the terms and variables of transformed Eulerian-mean (TEM) equations from multiple reanalyses: MERRA-2, JRA-55, ERA-Interim, and CFSR
Source: Copernicus journal article supplement (doi:10.5194/acp-24-7873-2024), 2024-07-10

JJA (81-10)

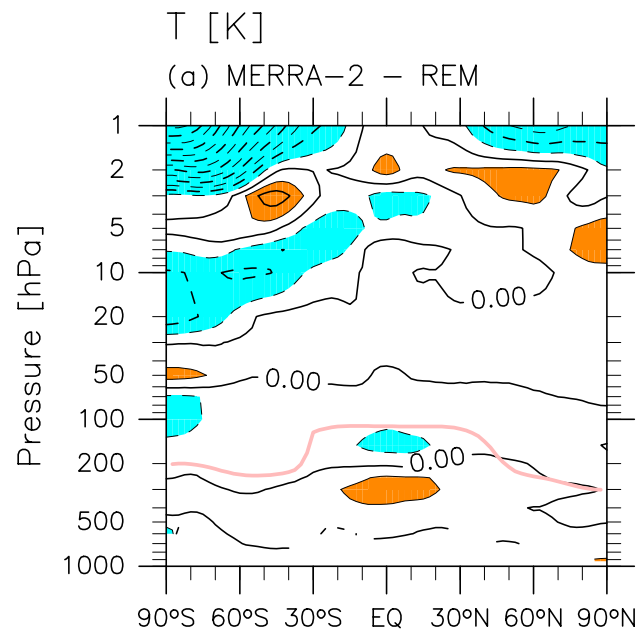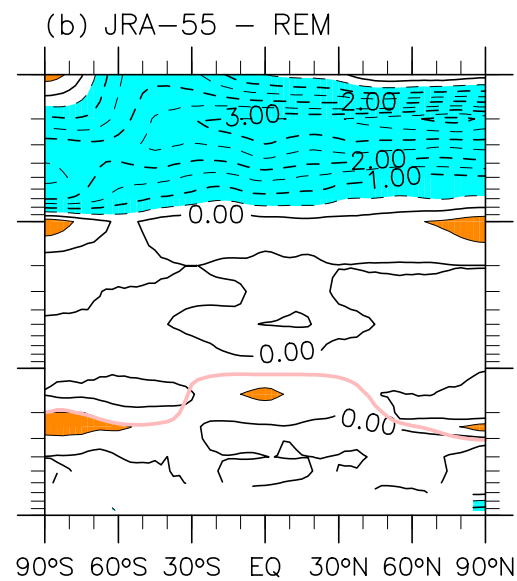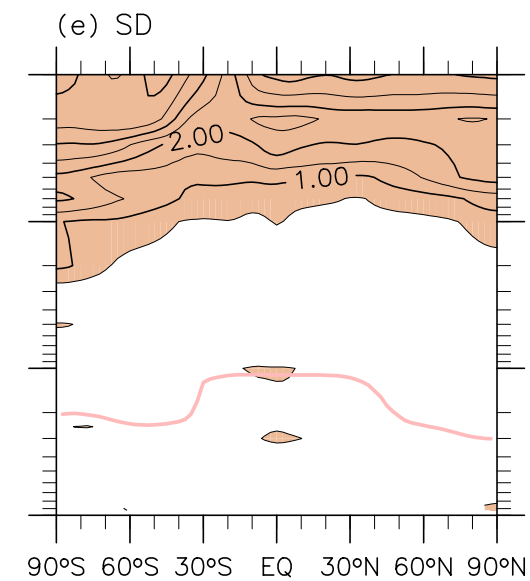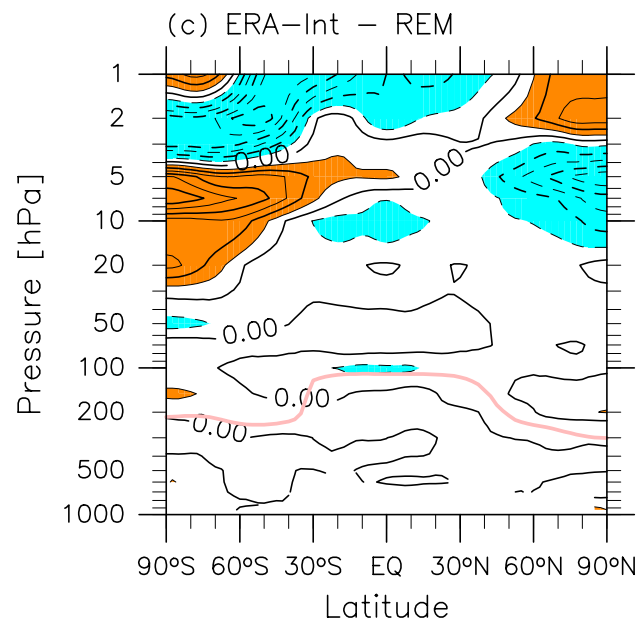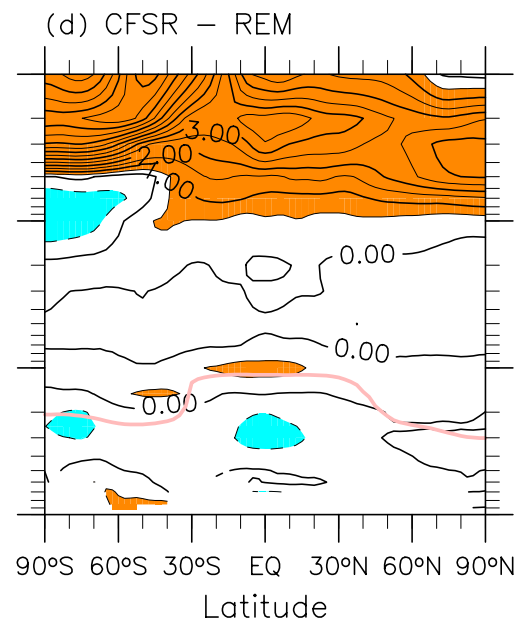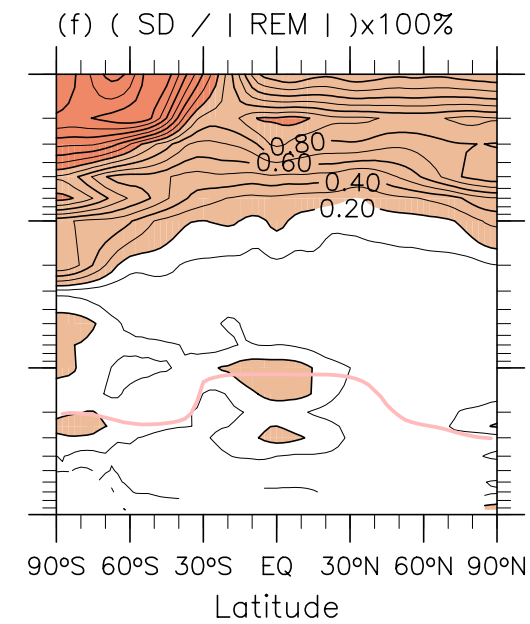

JJA (81-10)

u [m/s]

(a) MERRA-2 - REM

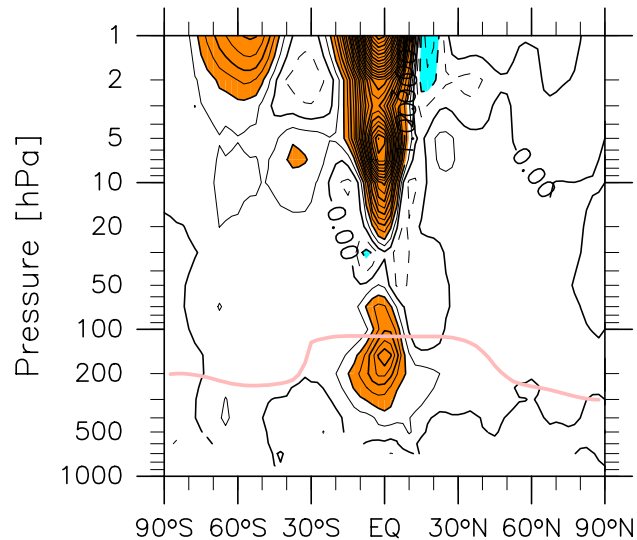

(b) JRA-55 - REM

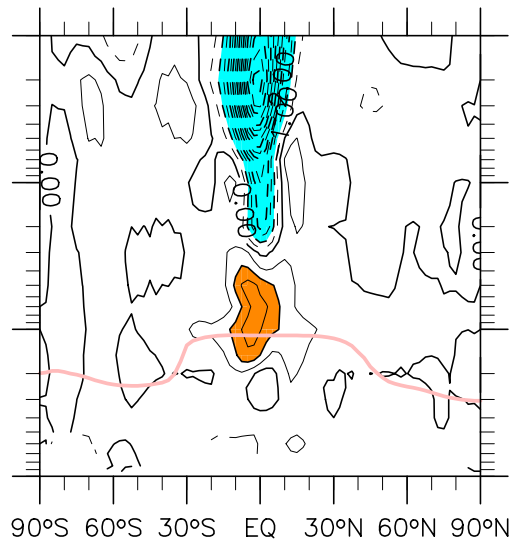

(e) SD

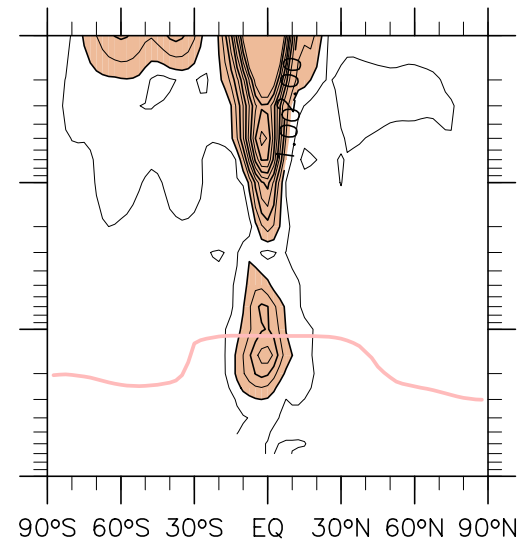

(c) ERA-Int - REM

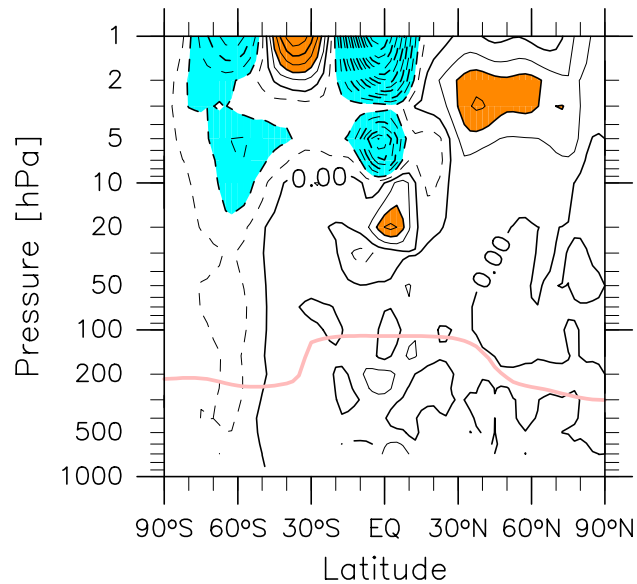

(d) CFSR - REM

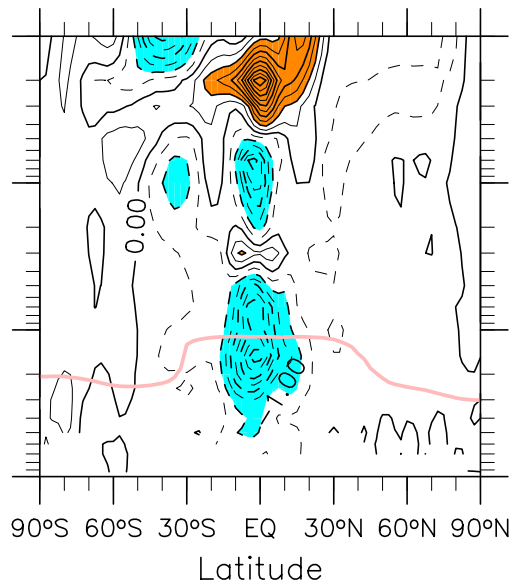

(f) ( SD / | REM | ) x 100%

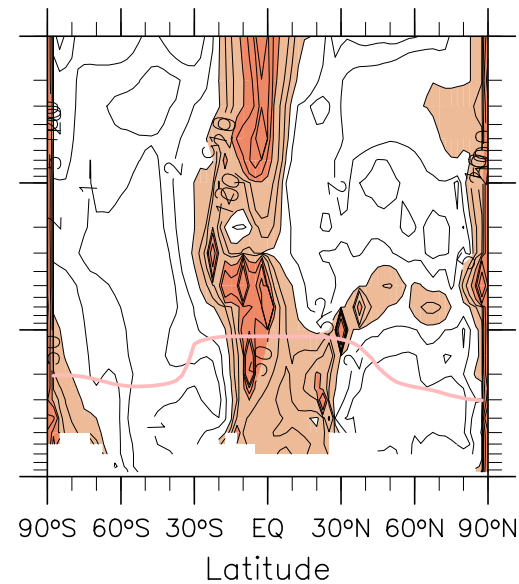

JJA (81–10)

$v_{res}$  [m/s]

(a) MERRA-2 – REM

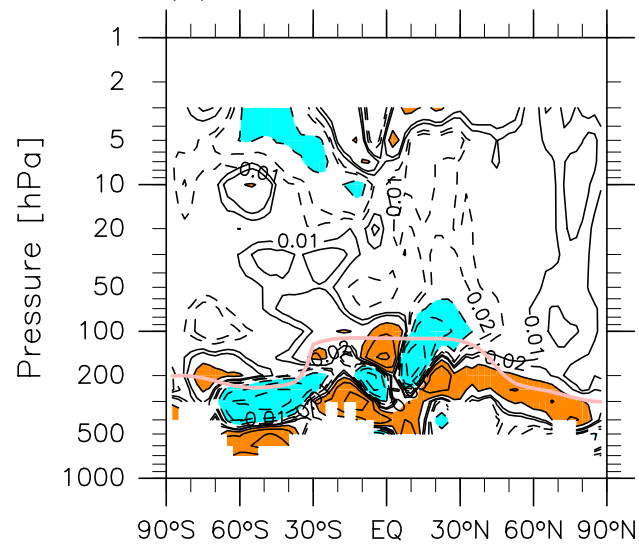

(b) JRA-55 – REM

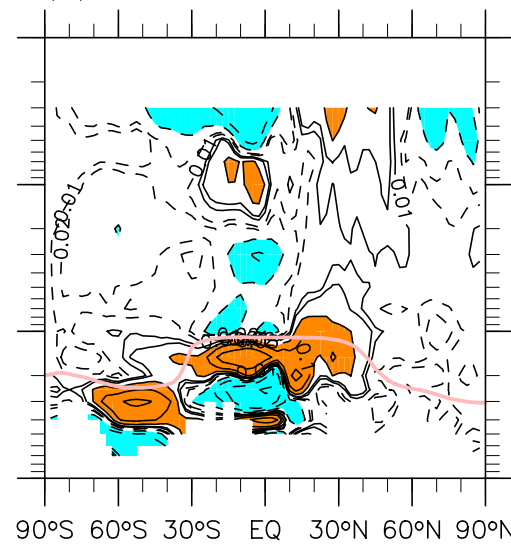

(e) SD

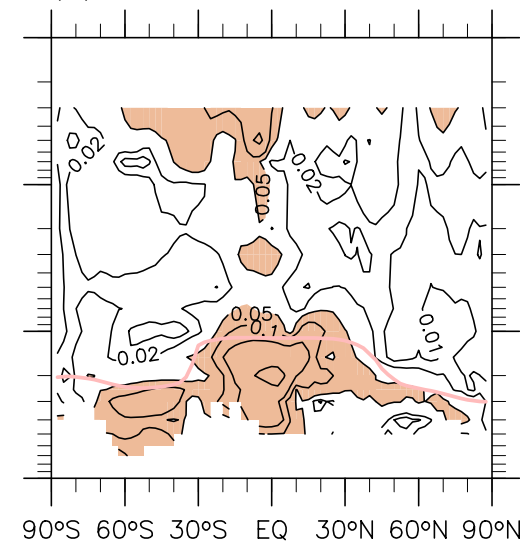

(c) ERA-Int – REM

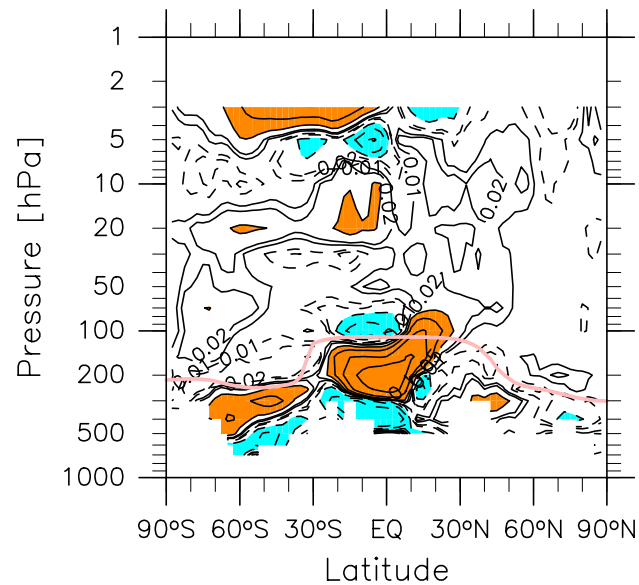

(d) CFSR – REM

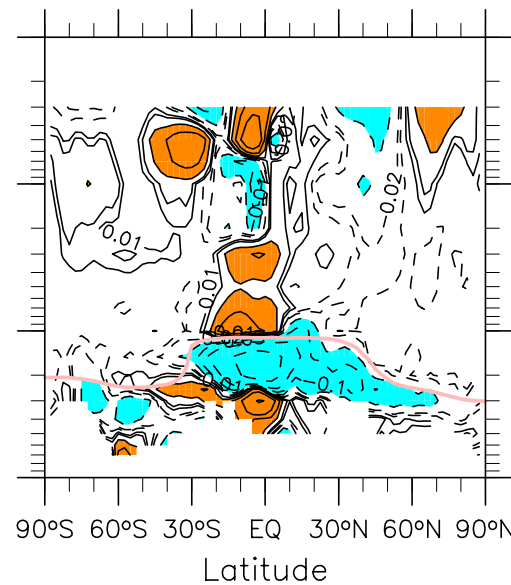

(f)  $(SD / |REM|) \times 100\%$

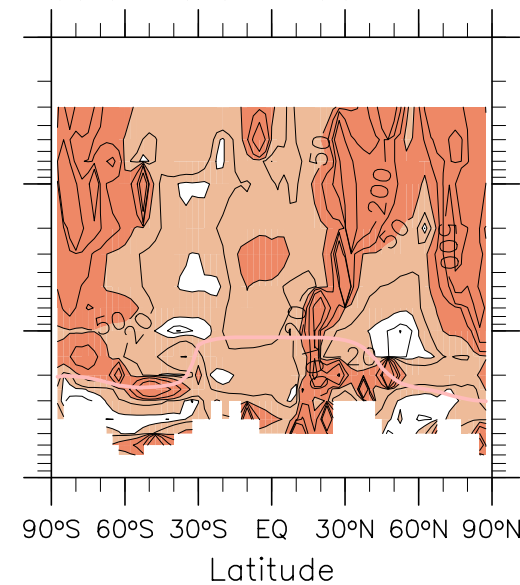

JJA (81–10)

$\omega_{\text{res}}$  [mPa/s]

(a) MERRA-2 – REM

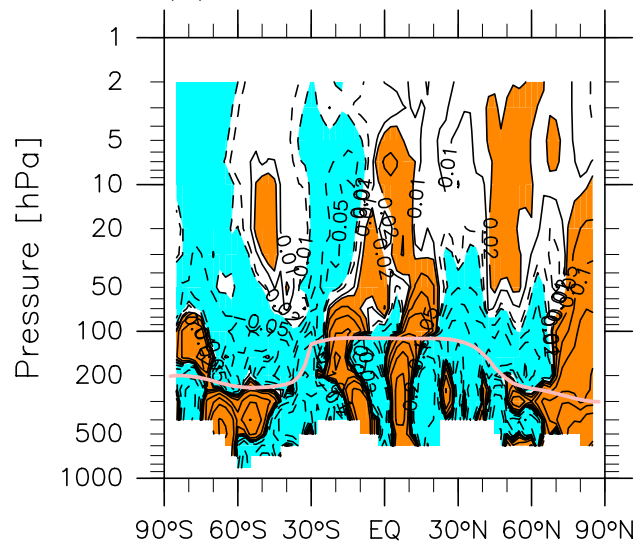

(b) JRA-55 – REM

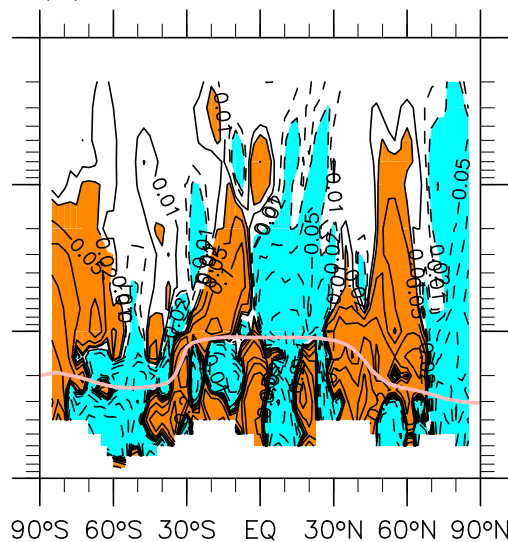

(e) SD

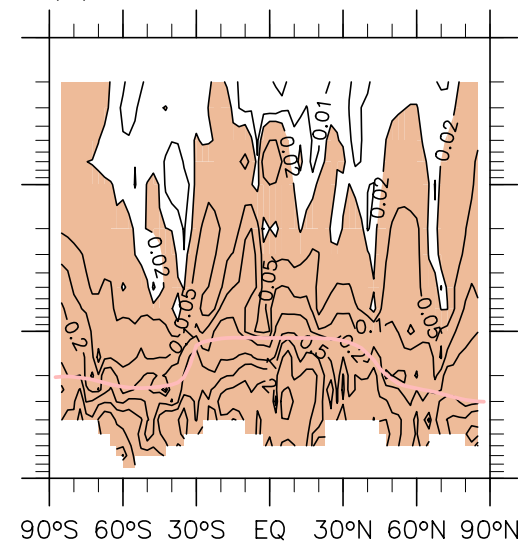

(c) ERA-Int – REM

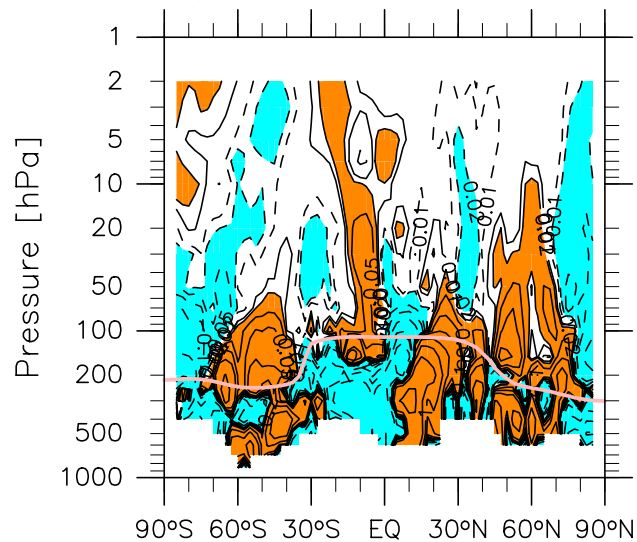

(d) CFSR – REM

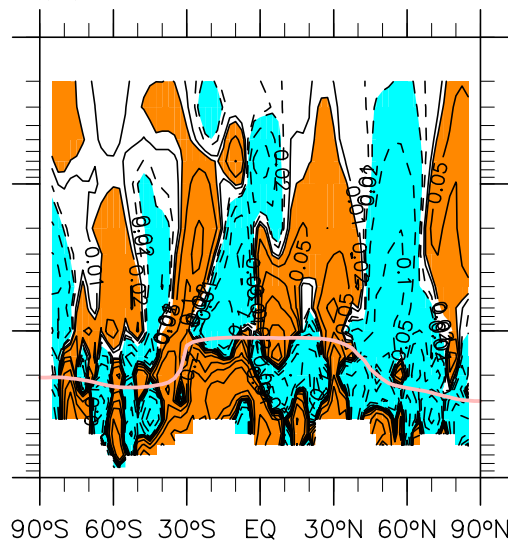

(f)  $(\text{SD} / |\text{REM}|) \times 100\%$

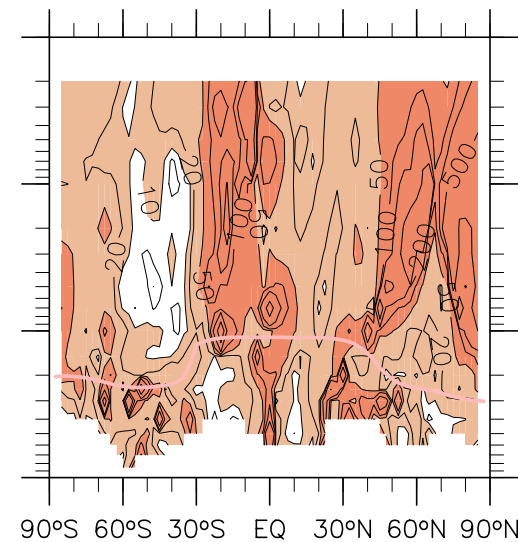

Latitude

Latitude

Latitude

$w_{res}$  [mm/s]

JJA (81–10)

(a) MERRA-2 – REM

(b) JRA-55 – REM

(e) SD

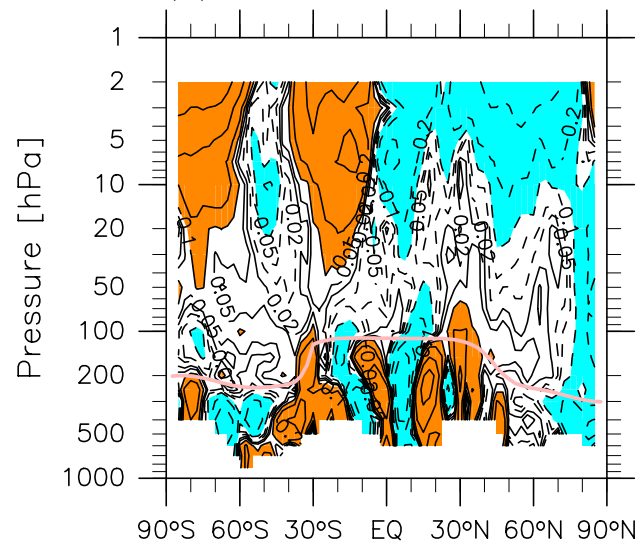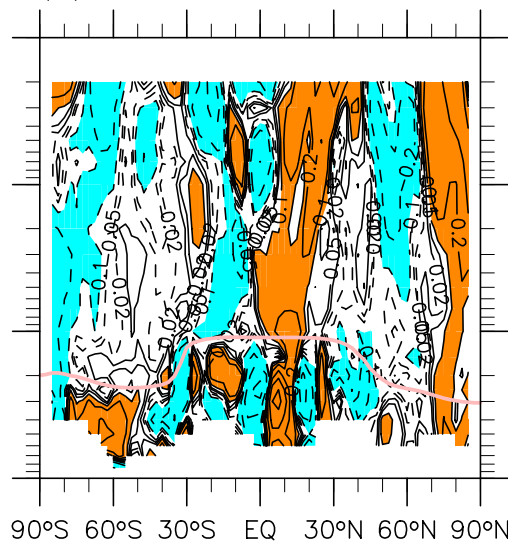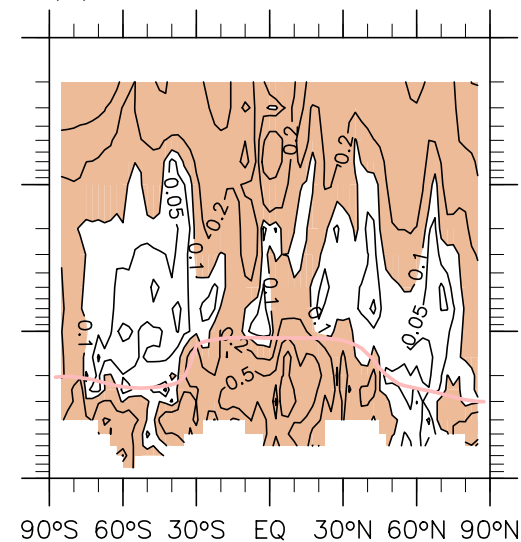

(c) ERA-Int – REM

(d) CFSR – REM

(f)  $(SD / |REM|) \times 100\%$

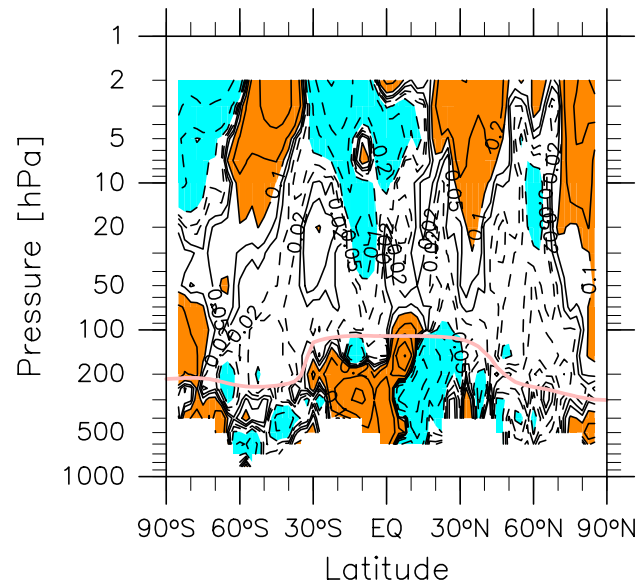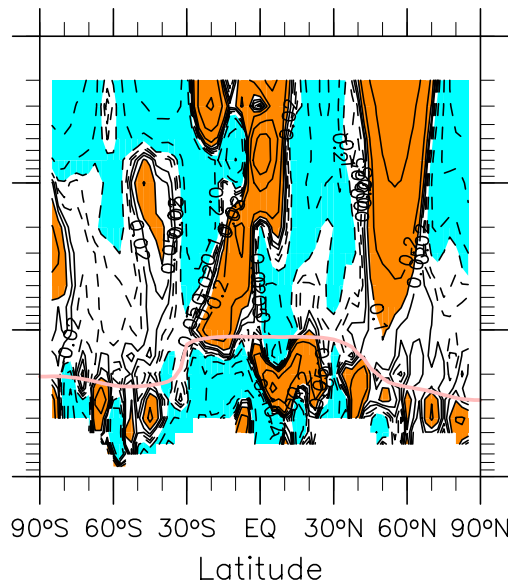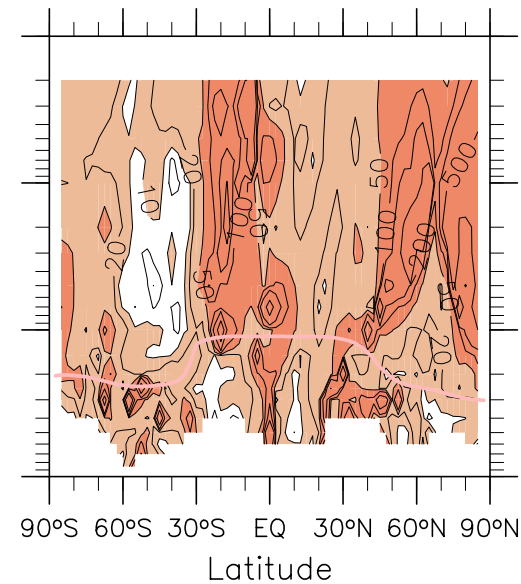



JJA (81–10)

$\psi_{\text{vres}}$  [kg/m/s]

(a) MERRA-2 – REM

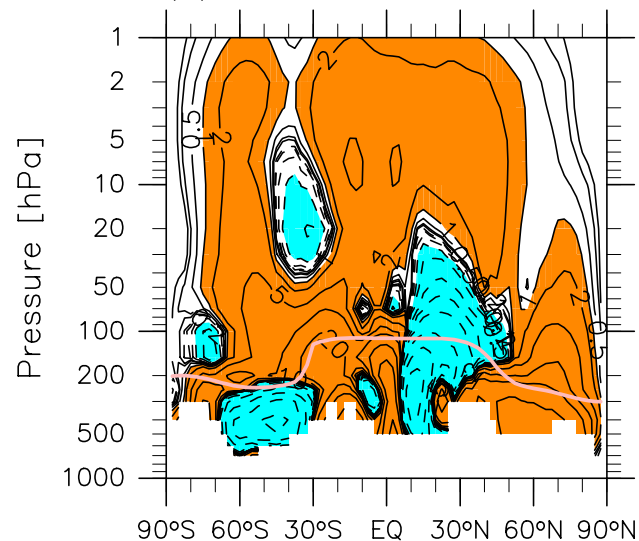

(b) JRA-55 – REM

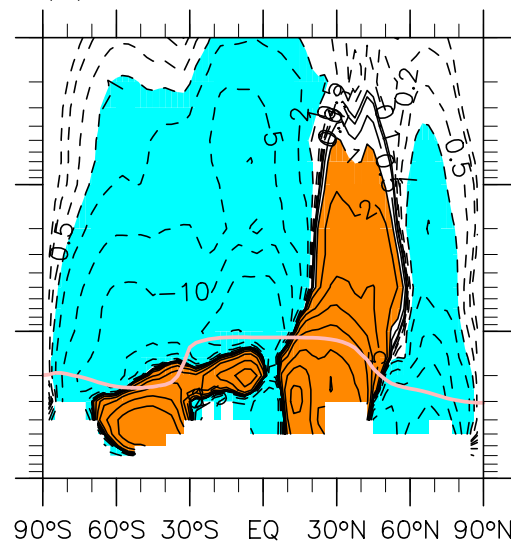

(e) SD

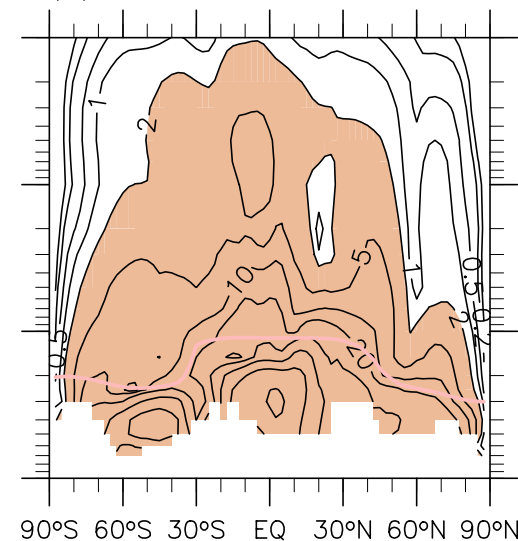

(c) ERA-Int – REM

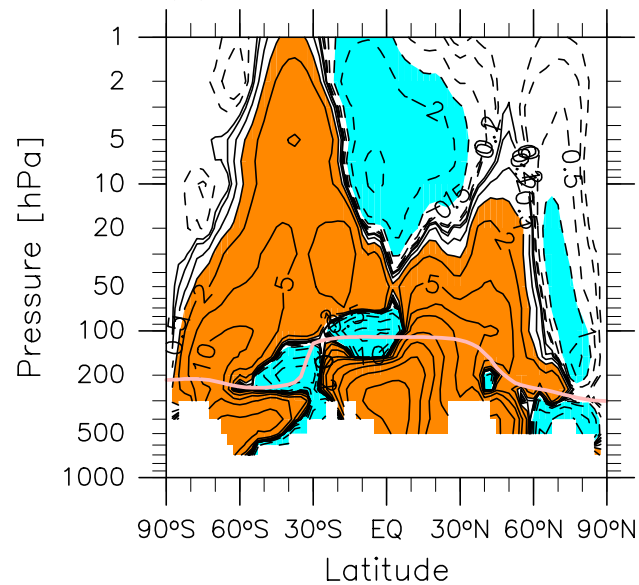

(d) CFSR – REM

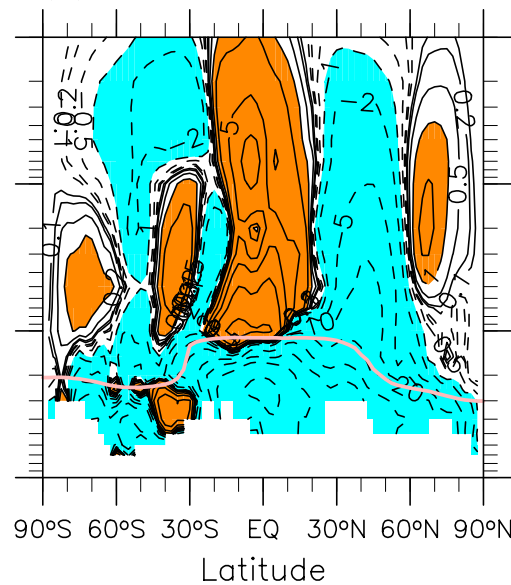

(f)  $(\text{SD} / |\text{REM}|) \times 100\%$

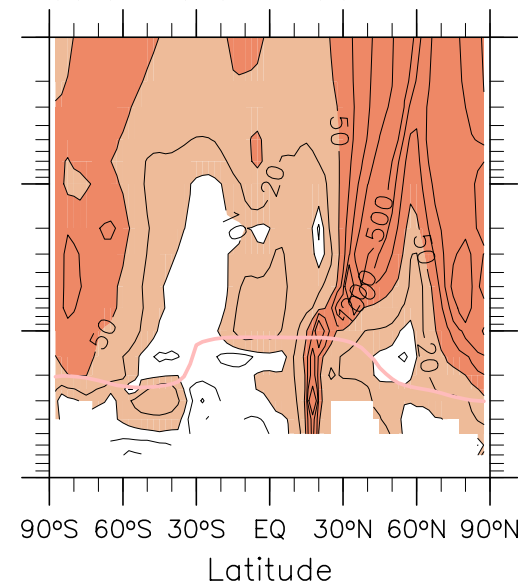

JJA (81–10)

$\psi_{\text{wres}}$  [kg/m/s]

(a) MERRA-2 – REM

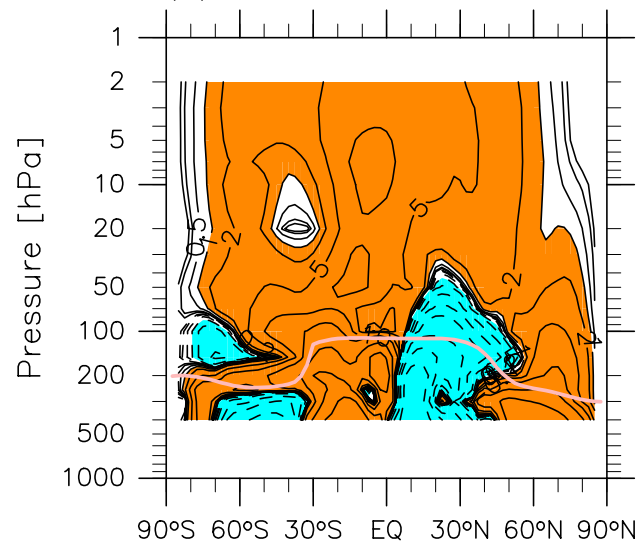

(b) JRA-55 – REM

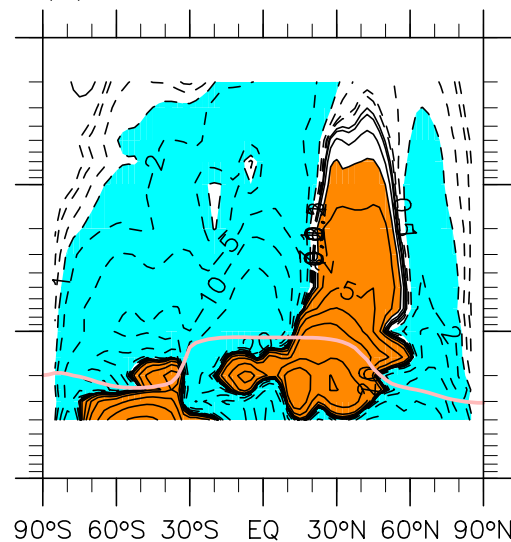

(e) SD

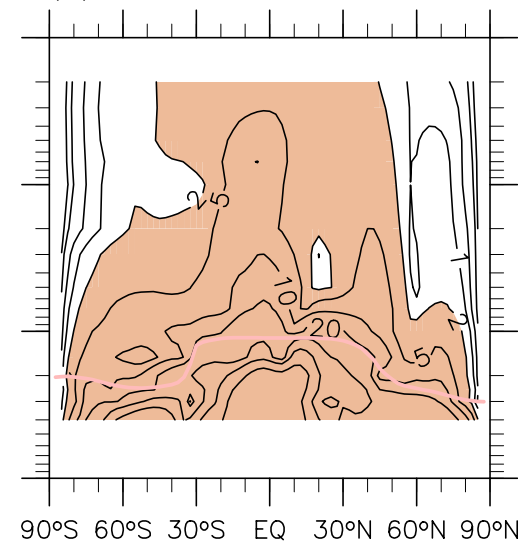

(c) ERA-Int – REM

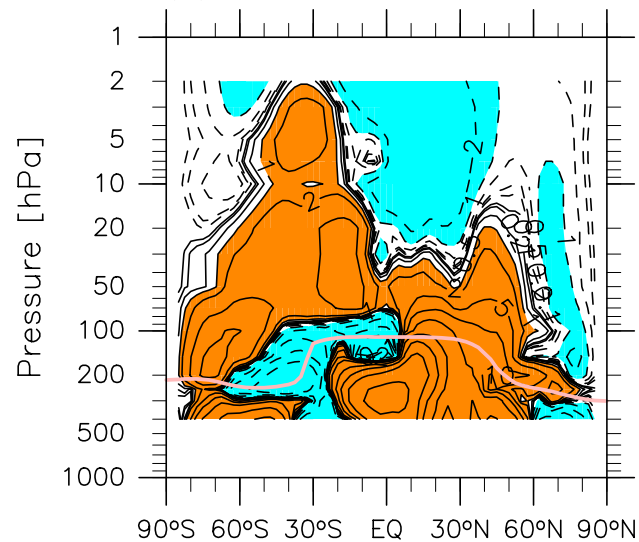

(d) CFSR – REM

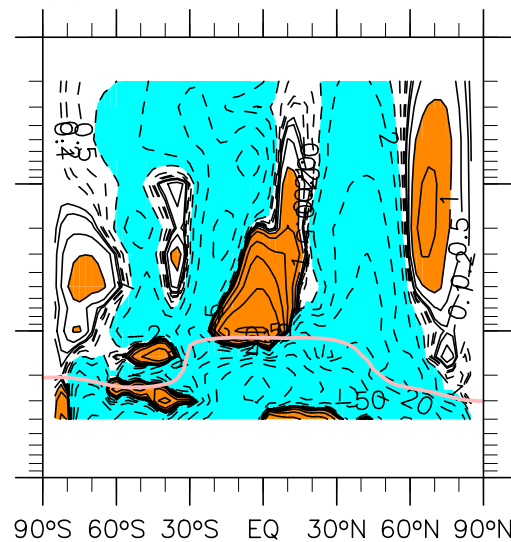

(f)  $(\text{SD} / |\text{REM}|) \times 100\%$

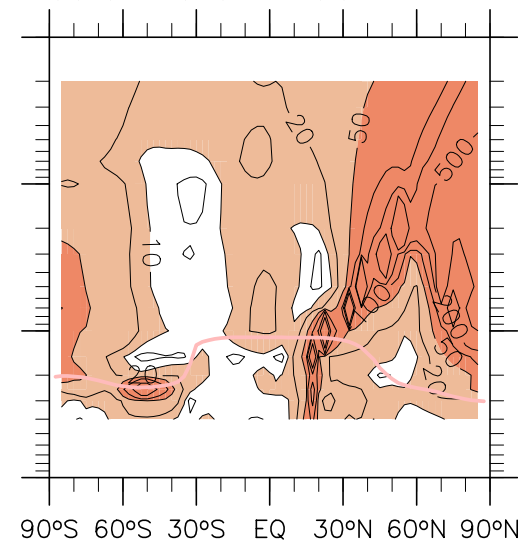

Latitude

Latitude

Latitude

Q\_longwave [K/d]

JJA (81-10)

(a) MERRA-2 - REM

(b) JRA-55 - REM

(e) SD

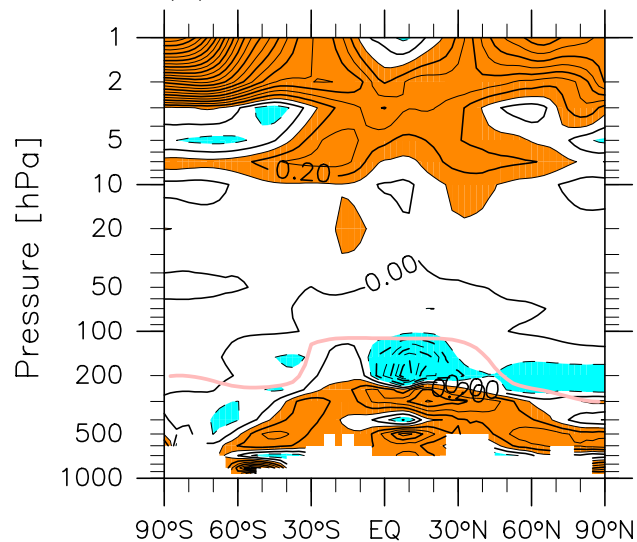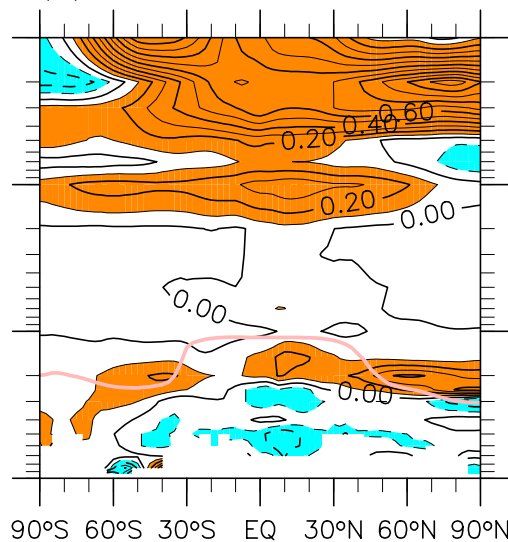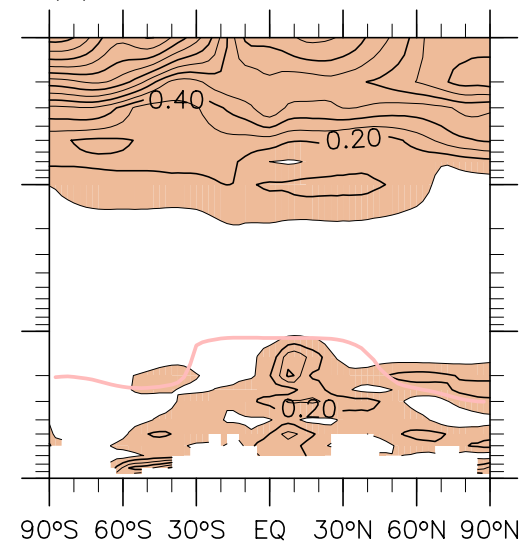

(c) ERA-Int - REM

(d) CFSR - REM

(f) ( SD / | REM | ) x 100%

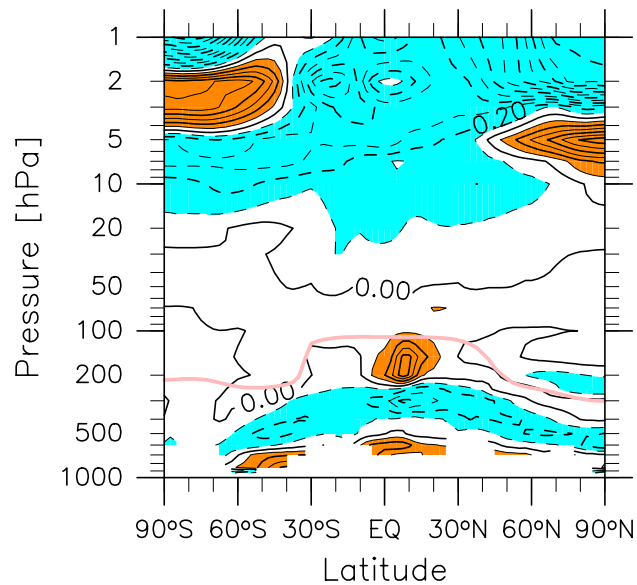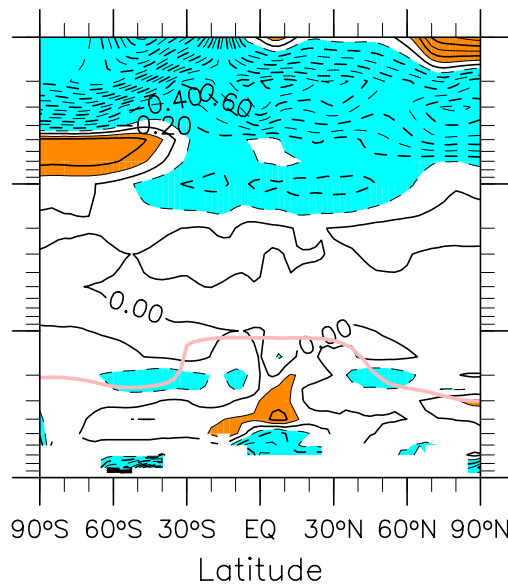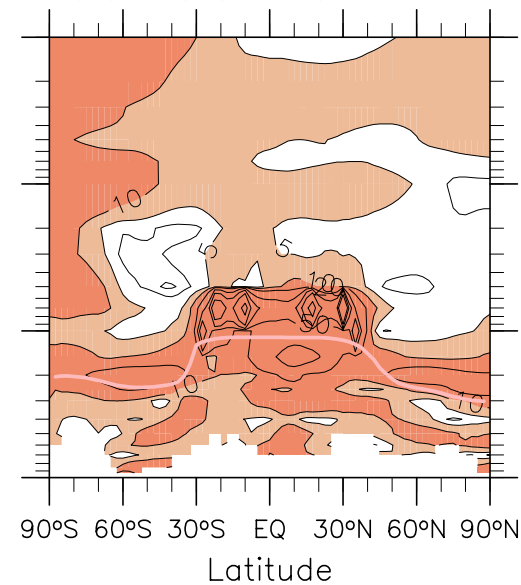



Q\_shortwave [K/d]

JJA (81-10)

(a) MERRA-2 - REM

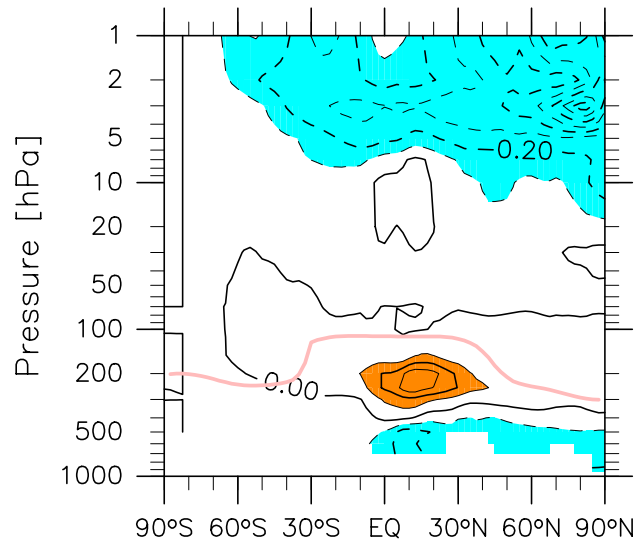

(b) JRA-55 - REM

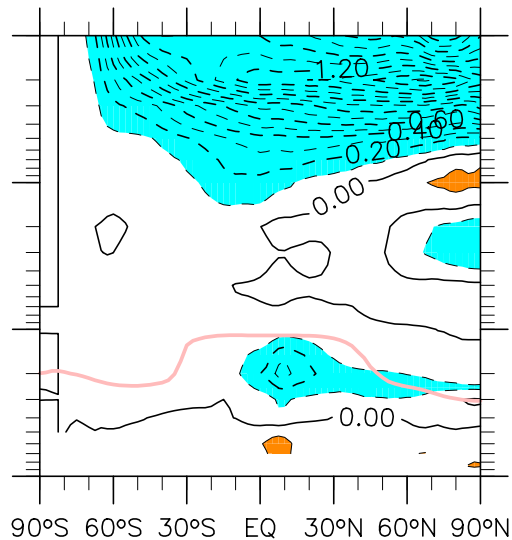

(e) SD

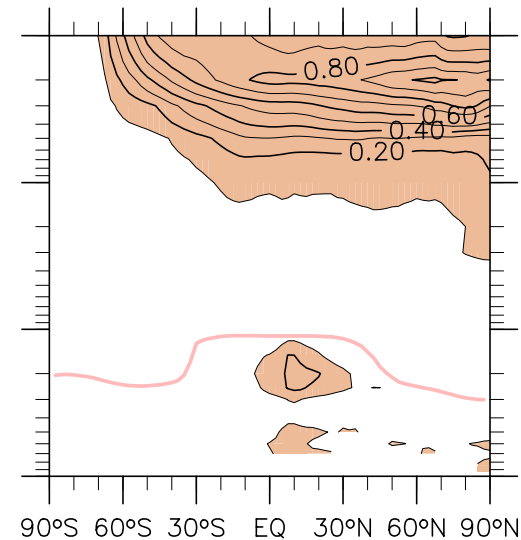

(c) ERA-Int - REM

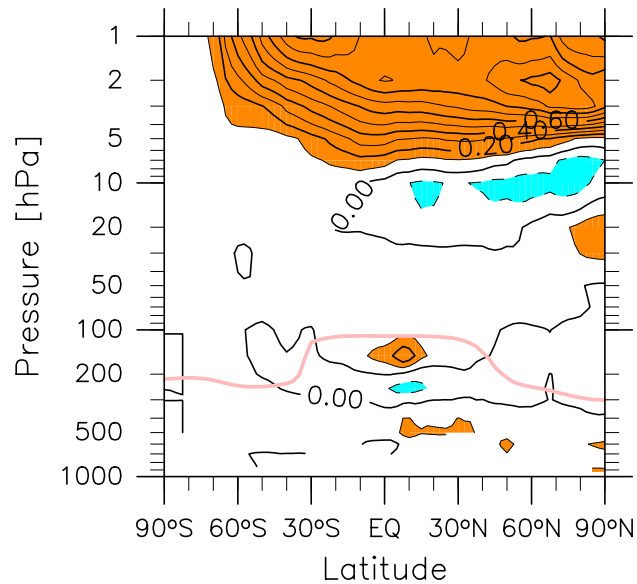

(d) CFSR - REM

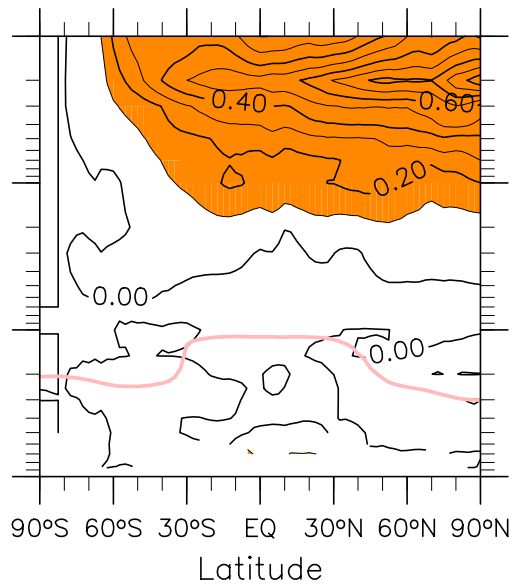

(f) ( SD / | REM | ) x 100%

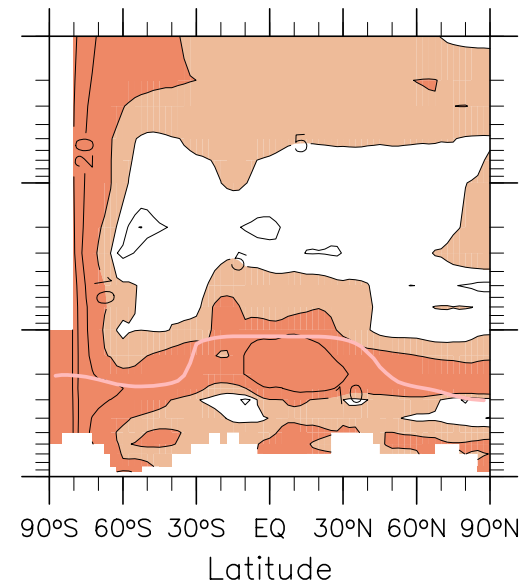

$Q_{\text{total}} - Q_{\text{rad}}$  [K/d]

JJA (81-10)

(a) MERRA-2 - REM

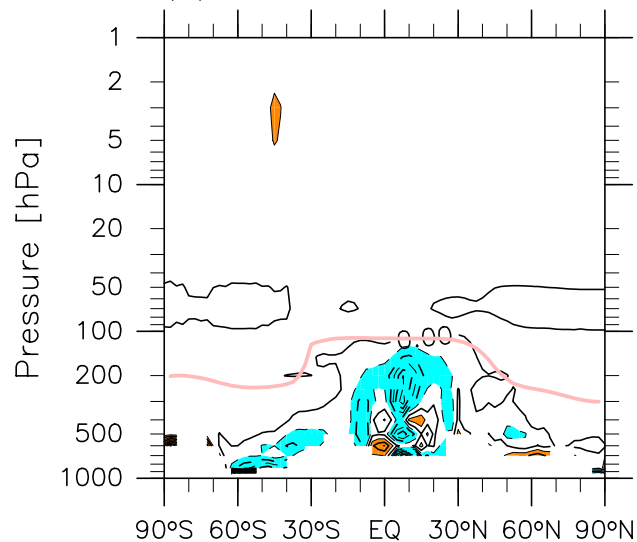

(b) JRA-55 - REM

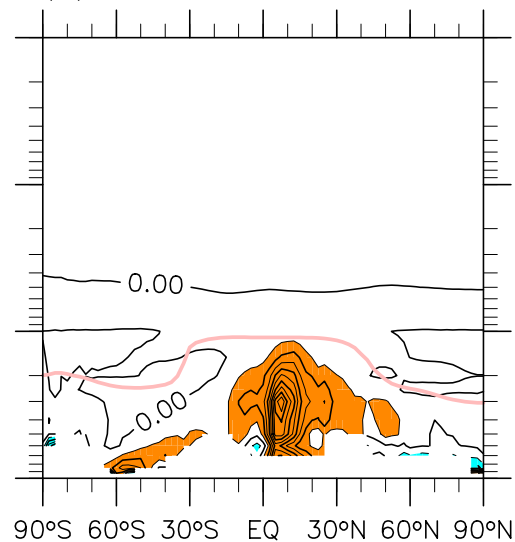

(e) SD

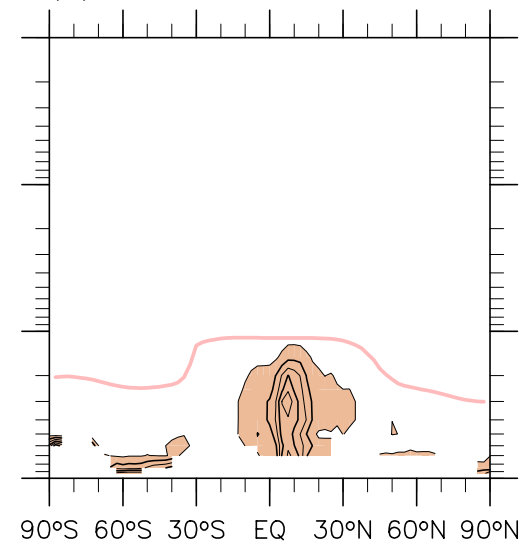

(c) ERA-Int - REM

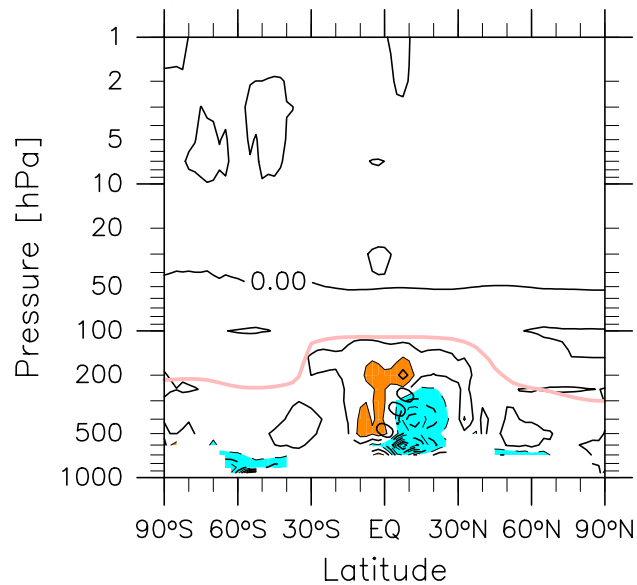

(d) CFSR - REM

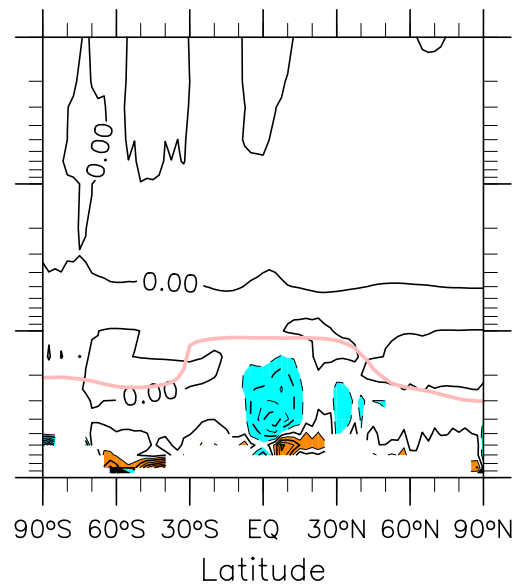

(f)  $(SD / |REM|) \times 100\%$

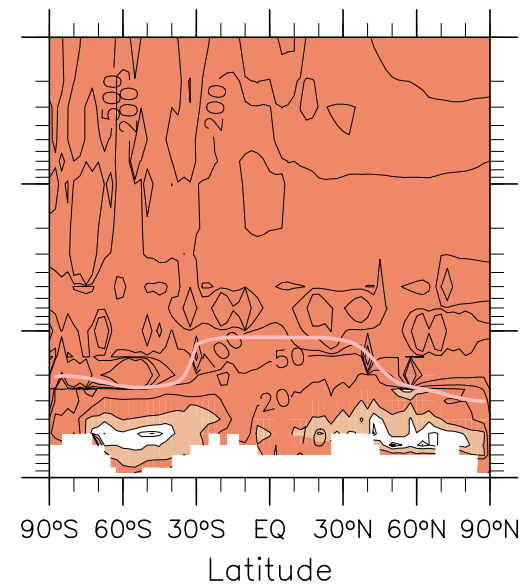

Ozone [ppmv]

JJA (81–10)

(a) MERRA-2 – REM

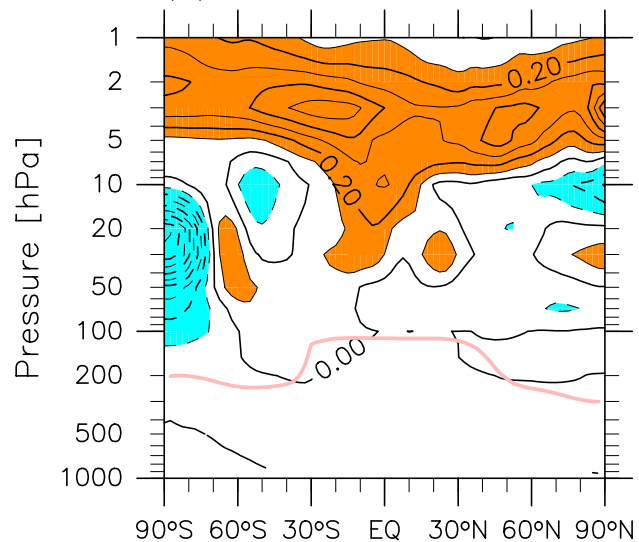

(b) JRA-55 – REM

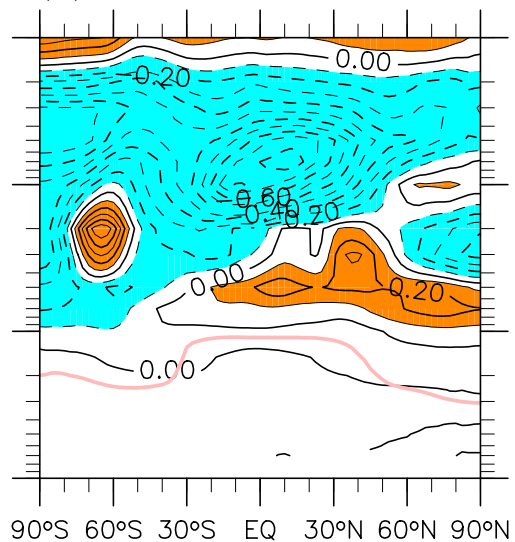

(e) SD

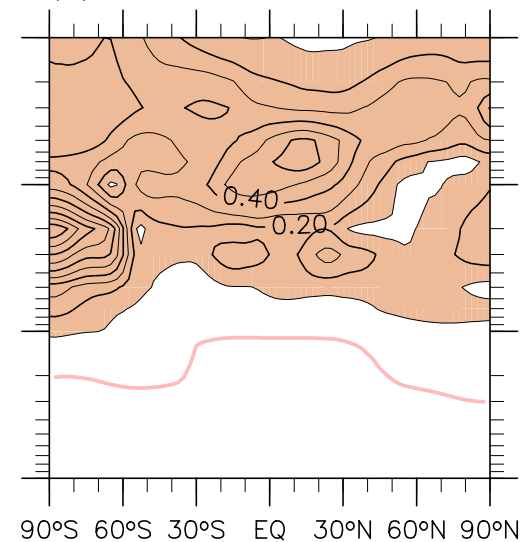

(c) ERA-Int – REM

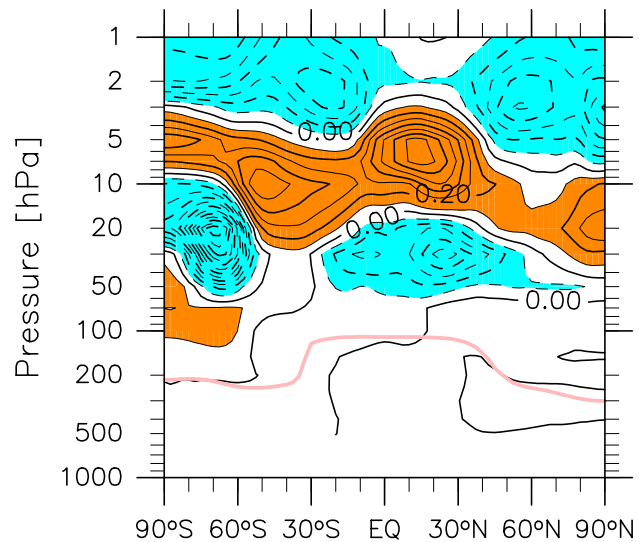

(d) CFSR – REM

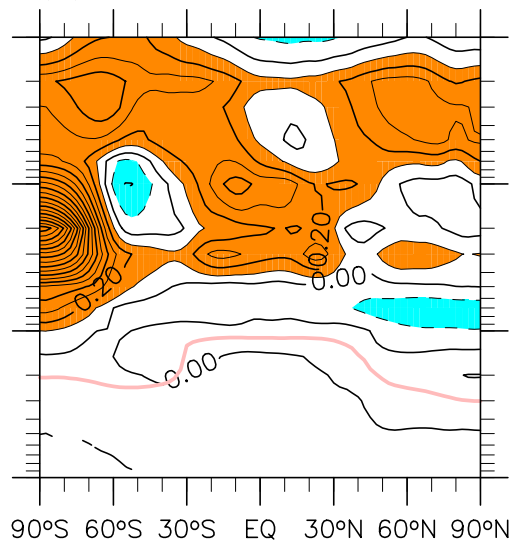

(f)  $(SD / |REM|) \times 100\%$

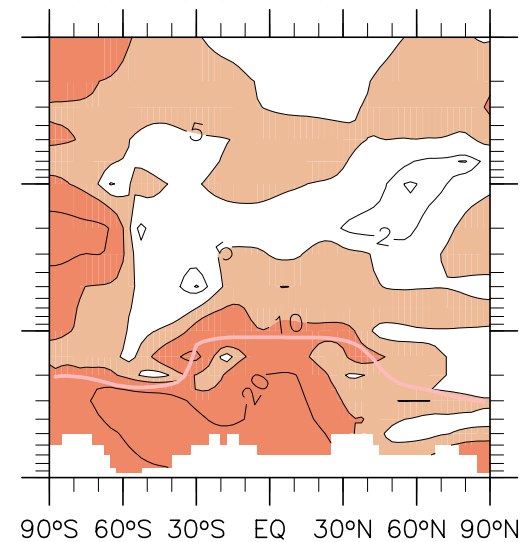

Pressure [hPa]

Pressure [hPa]

Latitude

Latitude

Latitude

$+f_v^*$

JJA (81-10)

(a) MERRA-2 - REM

(b) JRA-55 - REM

(e) SD

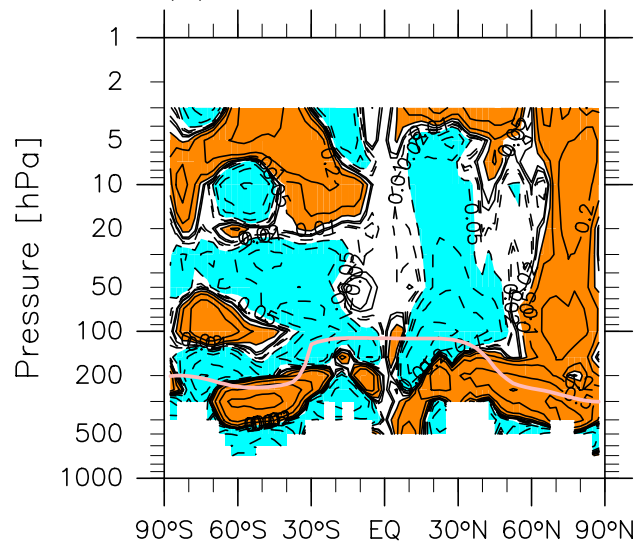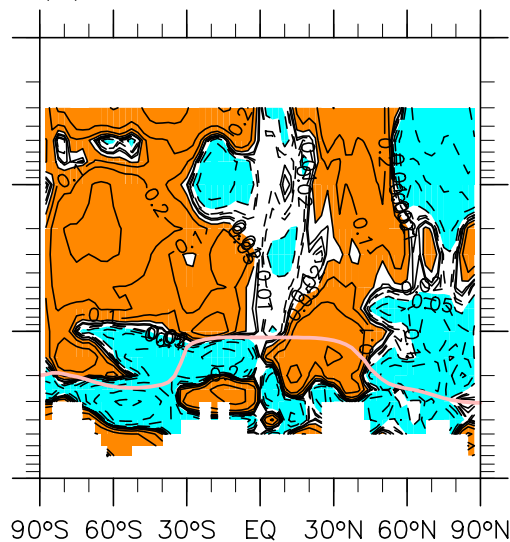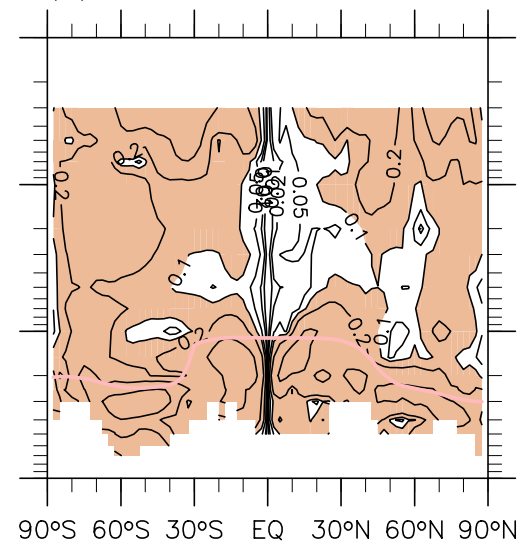

(c) ERA-Int - REM

(d) CFSR - REM

(f)  $(SD / |REM|) \times 100\%$

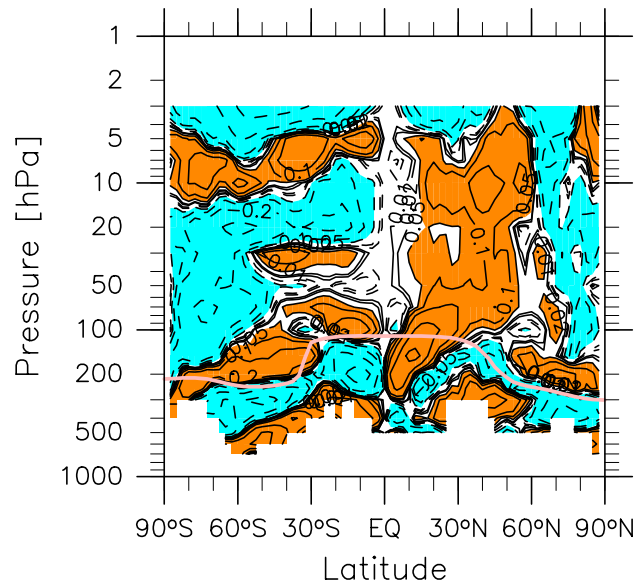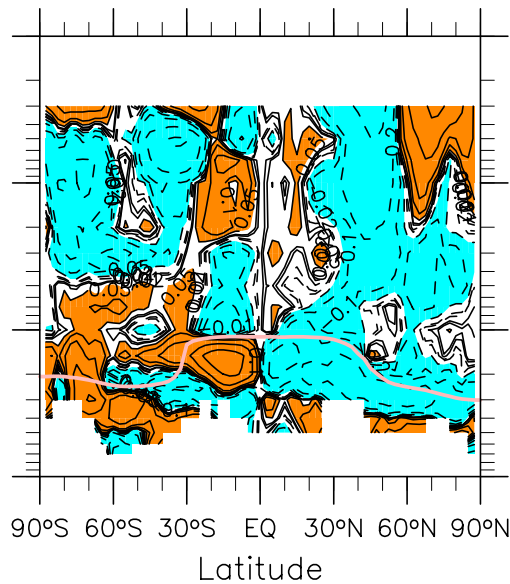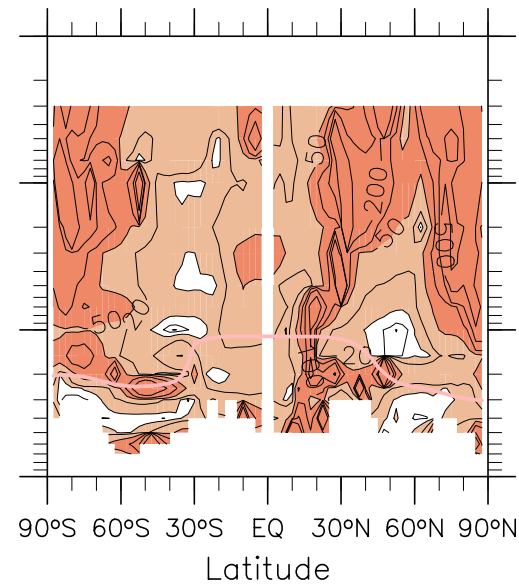

$$+fv^* - v^* \frac{\partial u}{\partial y} - \omega^* \frac{\partial u}{\partial p}$$

JJA (81–10)

(a) MERRA-2 – REM

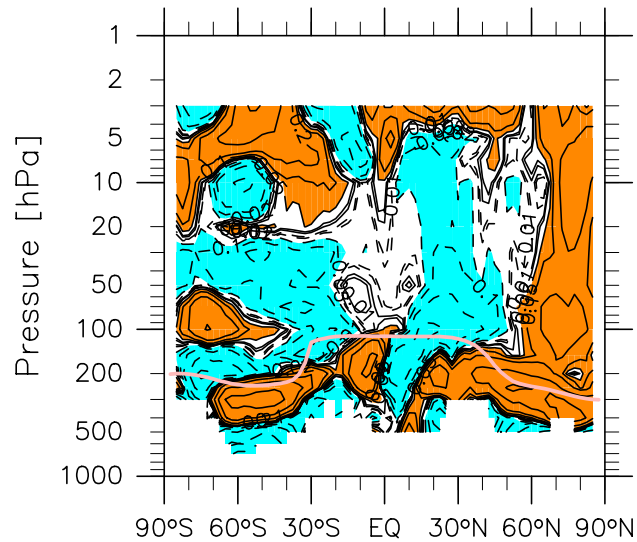

(b) JRA-55 – REM

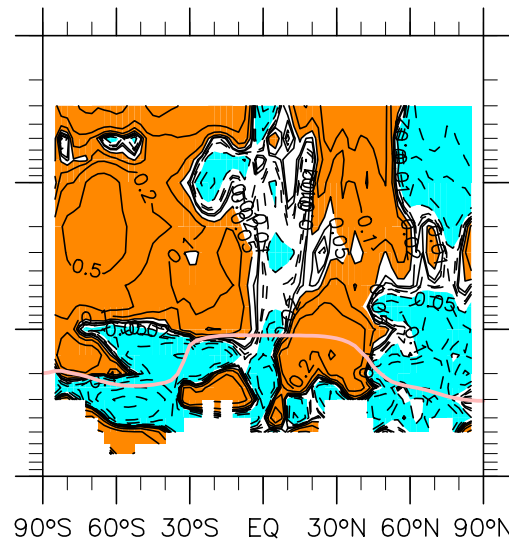

(e) SD

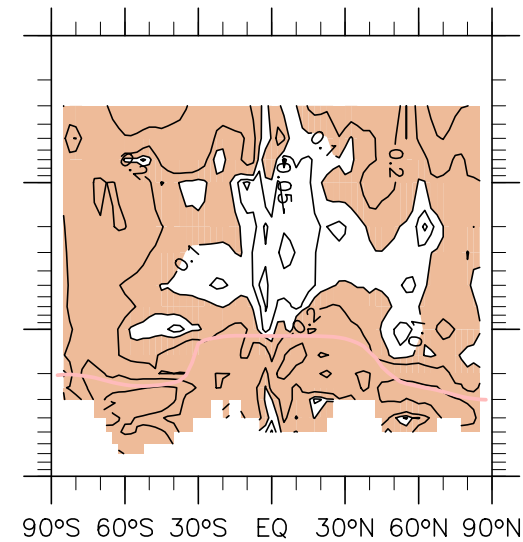

(c) ERA-Int – REM

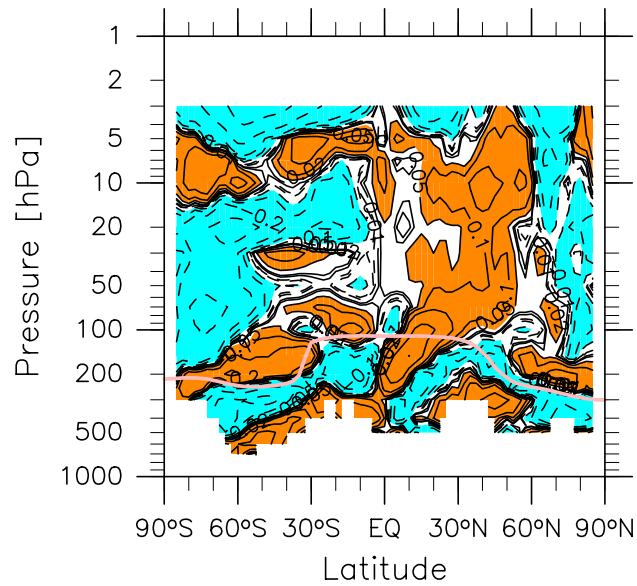

(d) CFSR – REM

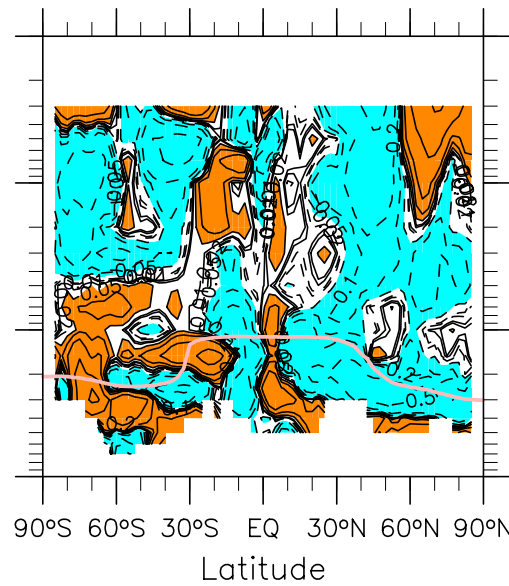

(f) ( SD / | REM | )x100%

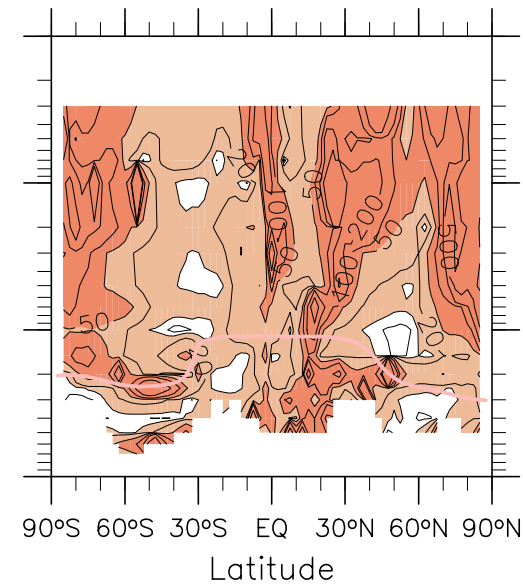



EPFD

JJA (81–10)

(a) MERRA-2 – REM

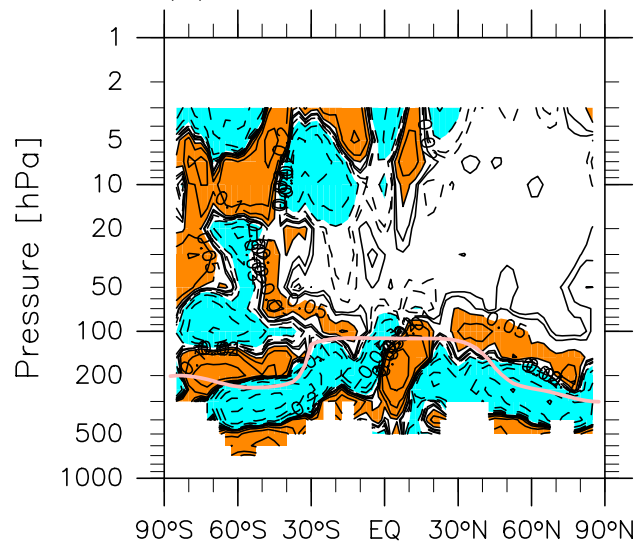

(b) JRA-55 – REM

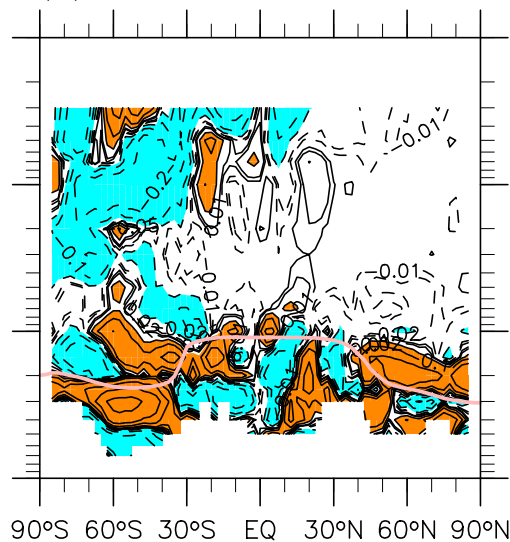

(e) SD

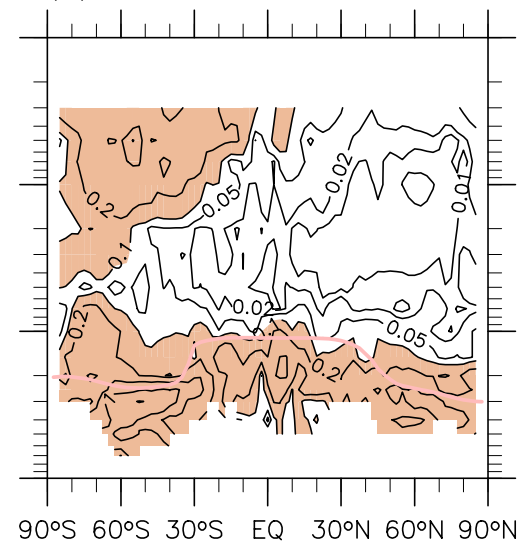

(c) ERA-Int – REM

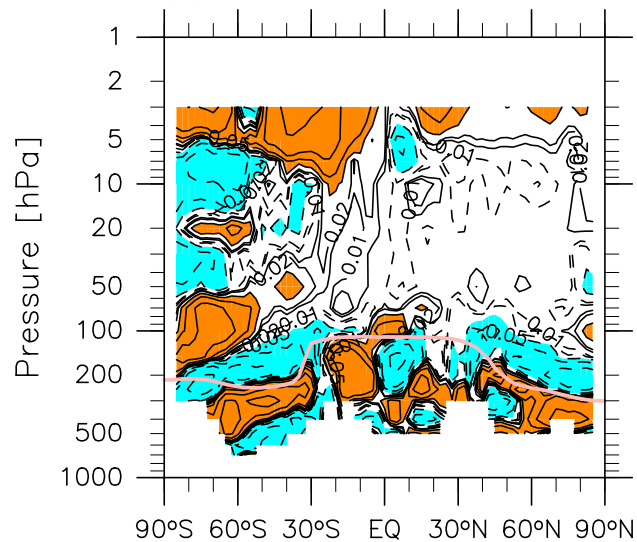

(d) CFSR – REM

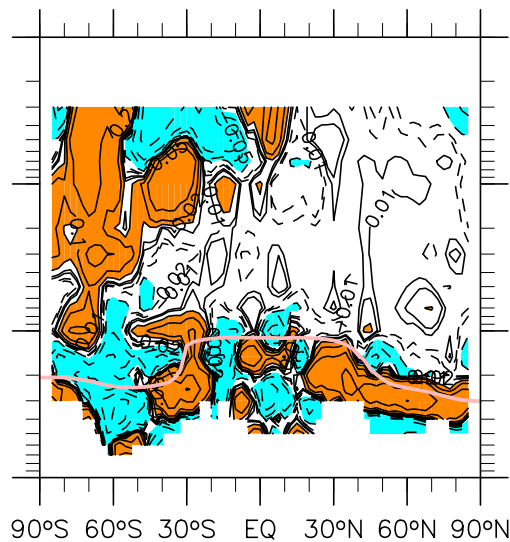

(f)  $(SD / |REM|) \times 100\%$

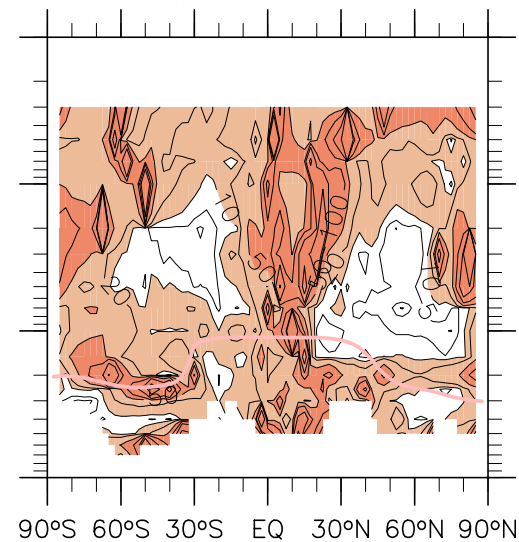

Latitude

Latitude

Latitude

Residual\_u

JJA (81-10)

(a) MERRA-2 - REM

(b) JRA-55 - REM

(e) SD

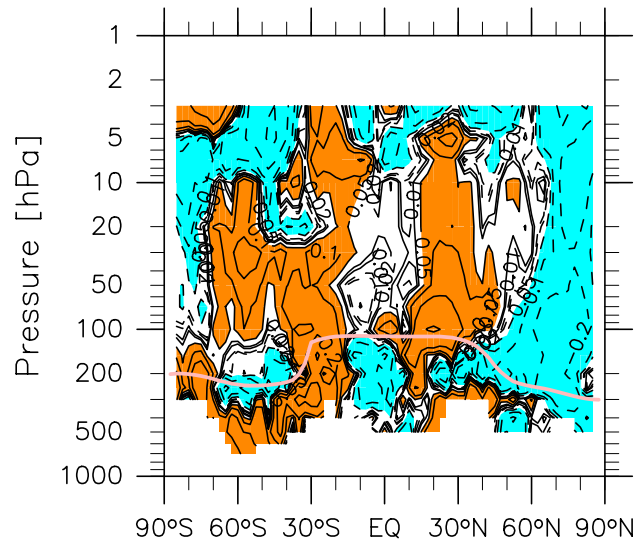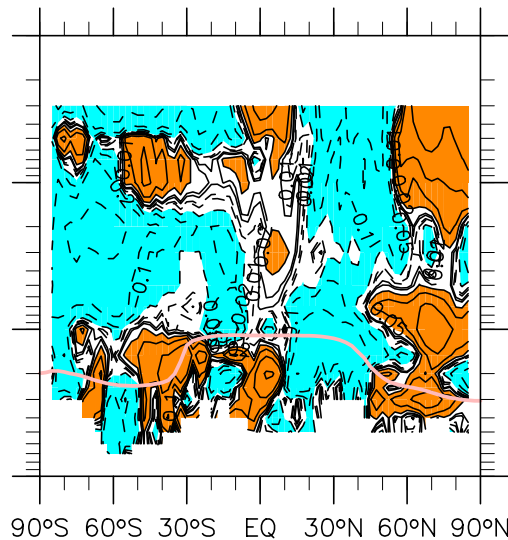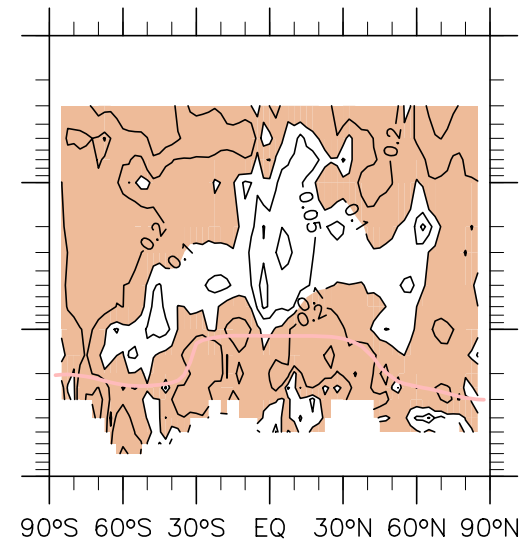

(c) ERA-Int - REM

(d) CFSR - REM

(f)  $(SD / |REM|) \times 100\%$

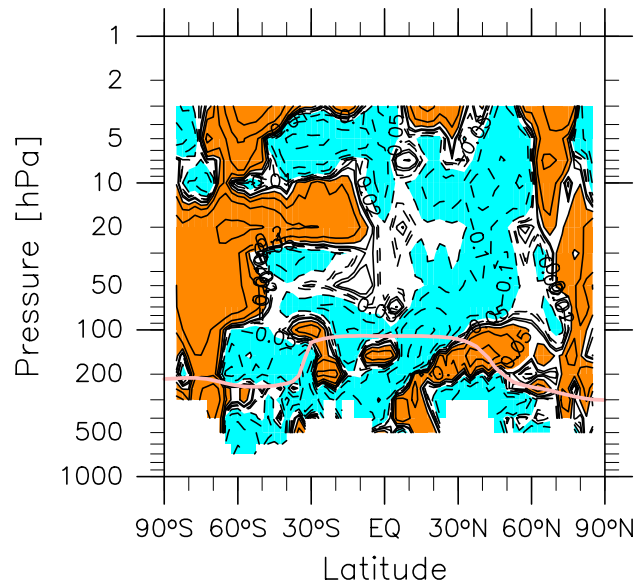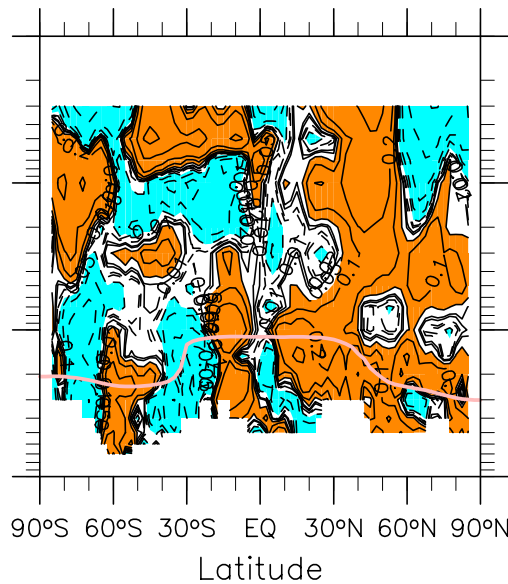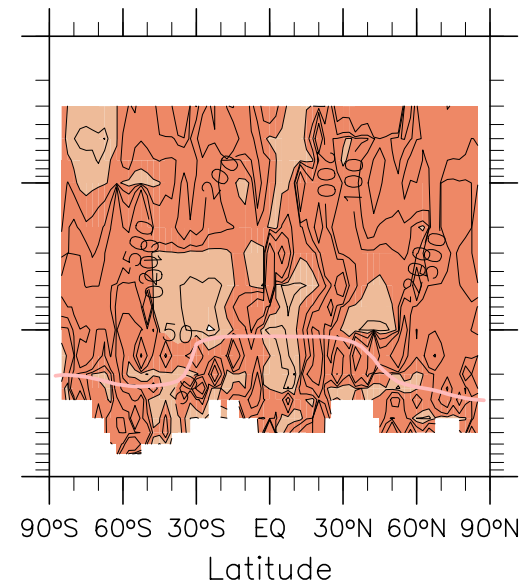

$$-\omega^* \partial\Theta/\partial p$$

JJA (81-10)

(a) MERRA-2 - REM

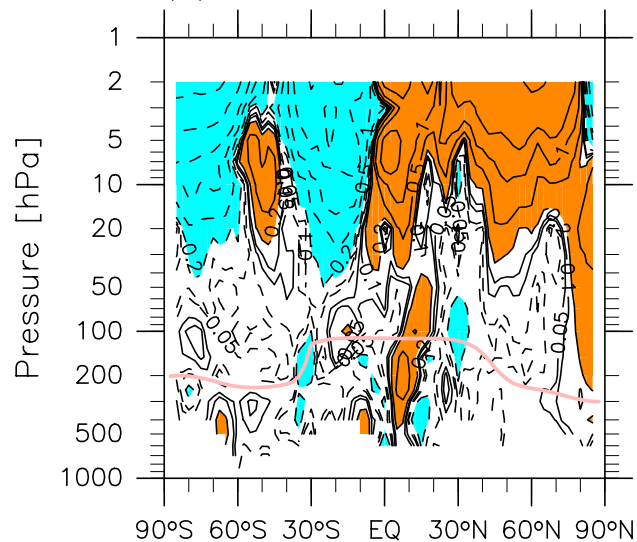

(b) JRA-55 - REM

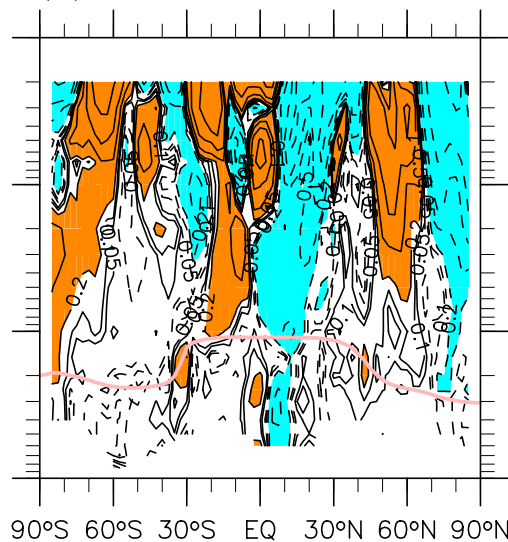

(e) SD

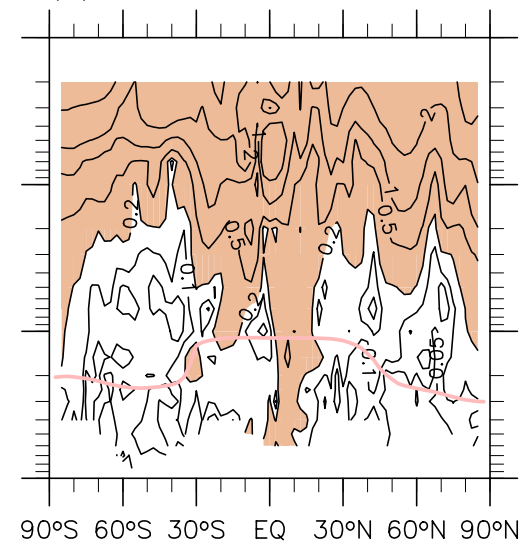

(c) ERA-Int - REM

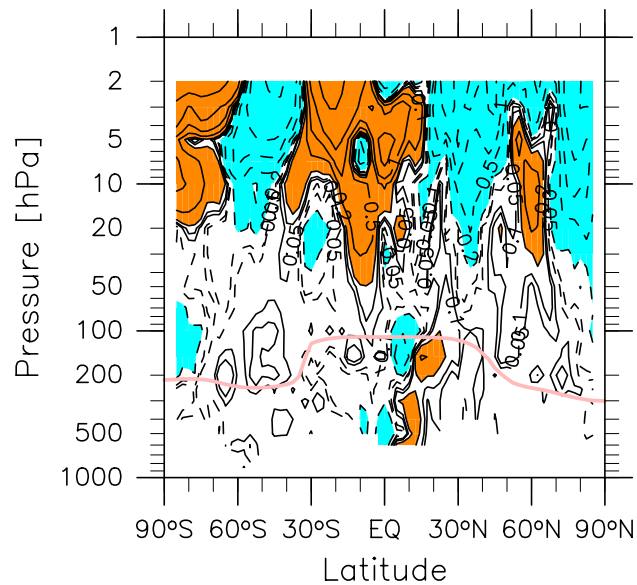

(d) CFSR - REM

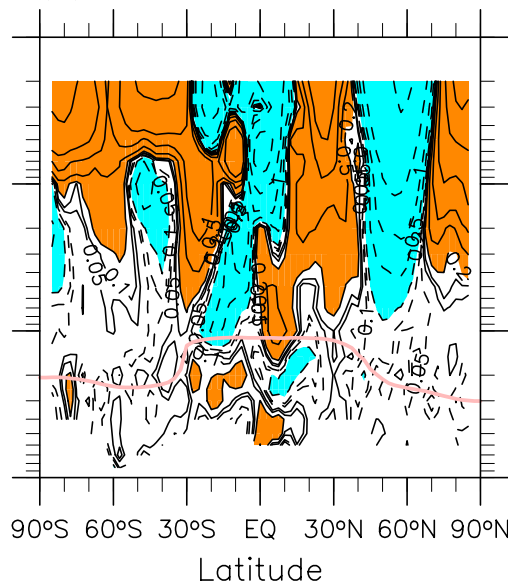

(f) ( SD / | REM | ) x 100%

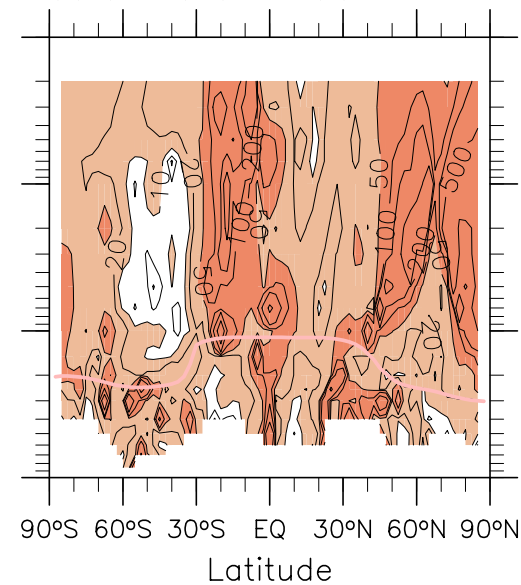

Q<sub>total</sub>

JJA (81–10)

(a) MERRA-2 – REM

(b) JRA-55 – REM

(e) SD

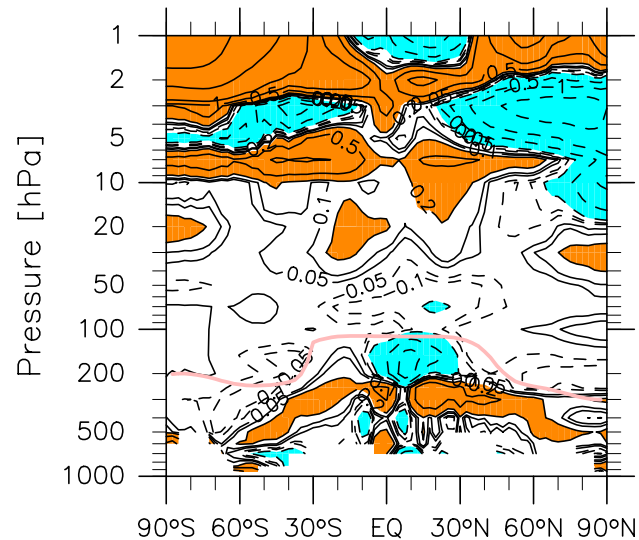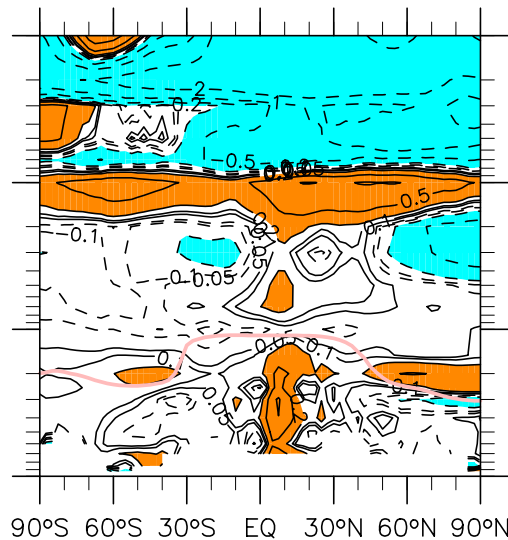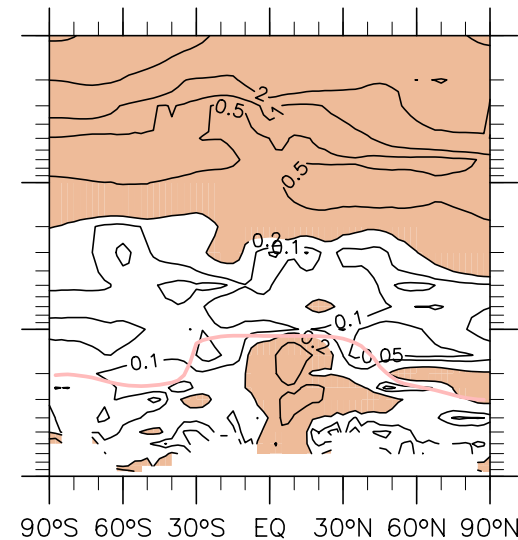

(c) ERA-Int – REM

(d) CFSR – REM

(f) ( SD / | REM | ) x 100%

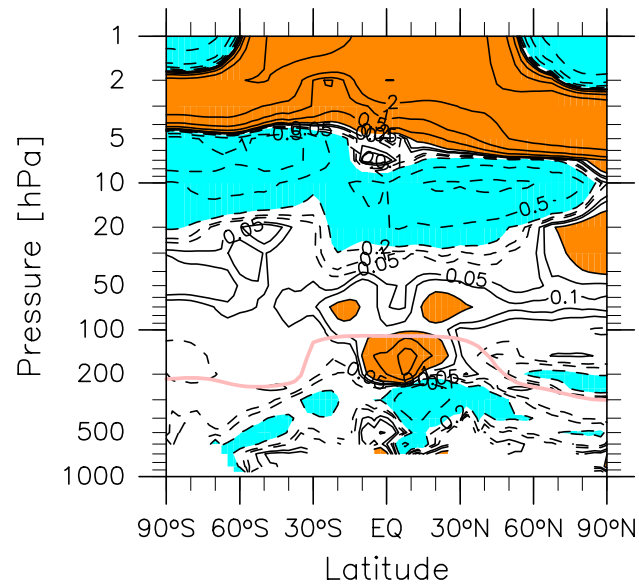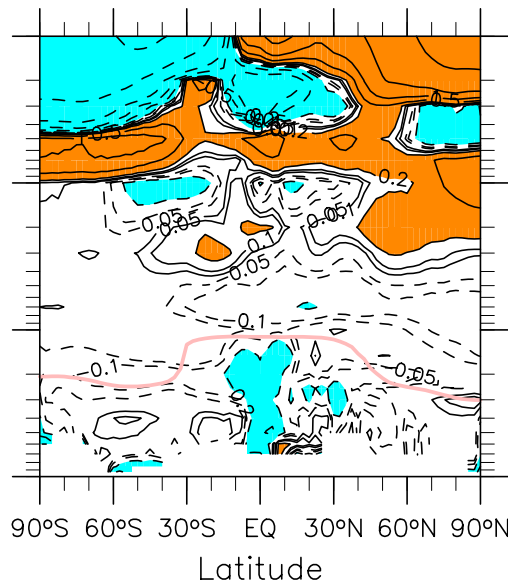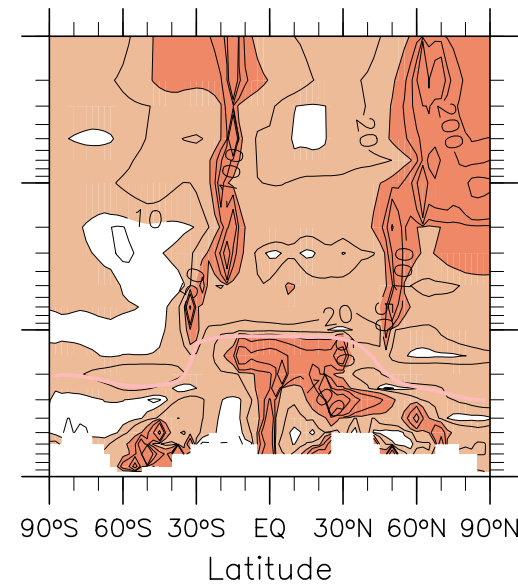



Residual\_Θ

JJA (81-10)

(a) MERRA-2 - REM

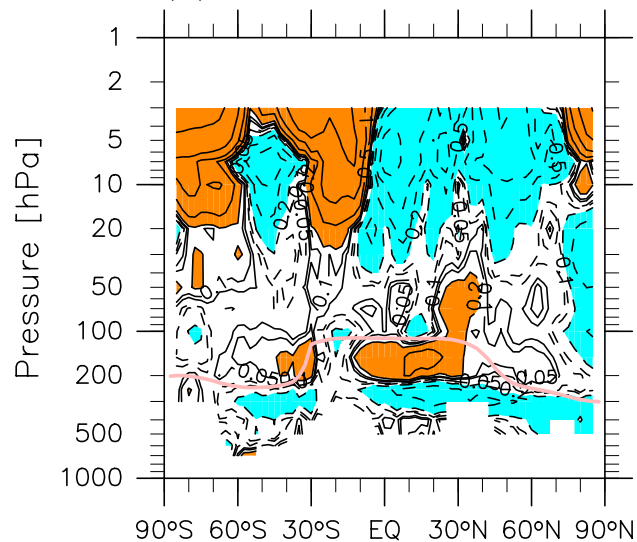

(b) JRA-55 - REM

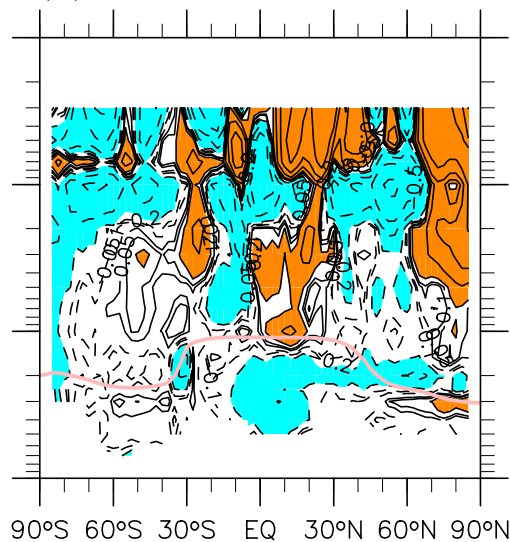

(e) SD

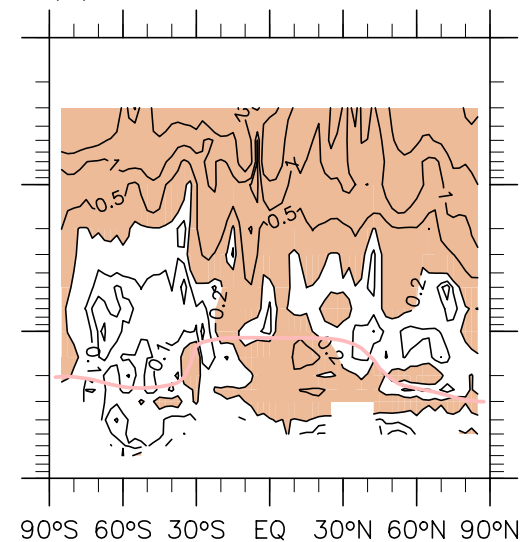

(c) ERA-Int - REM

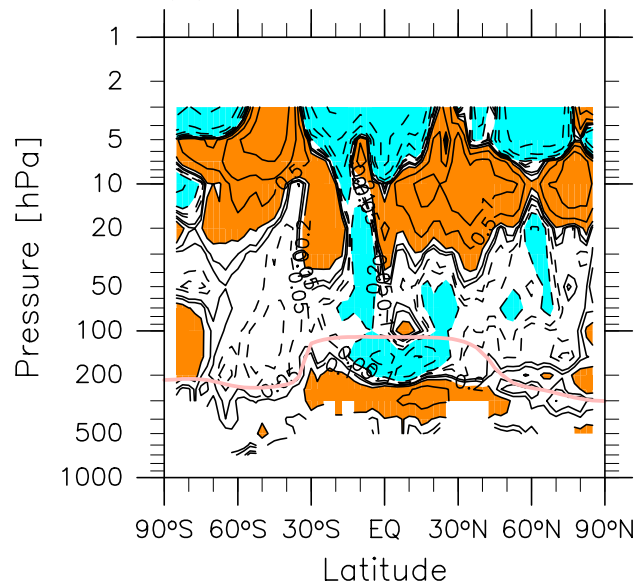

(d) CFSR – REM

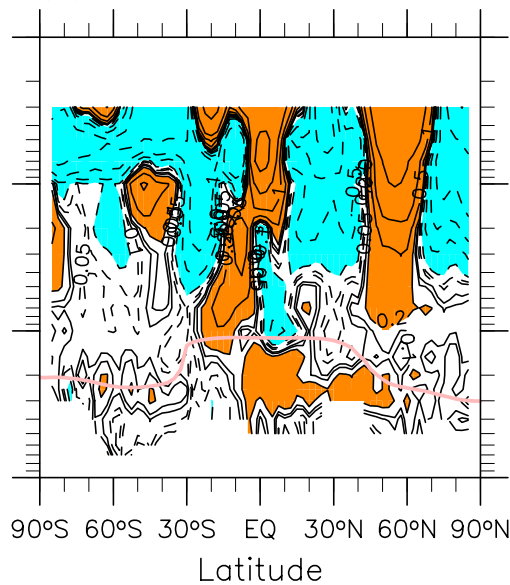
$$(f) \left( \frac{SD}{|REM|} \right) \times 100\%$$
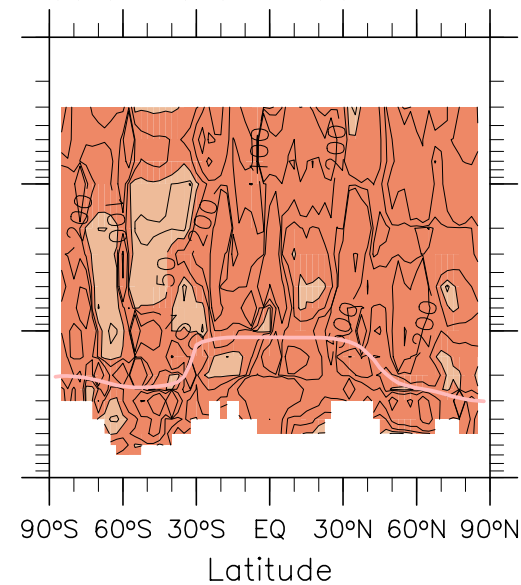

Supplement: Supplementary file 5 [file acp-24-7873-2024-supplement.zip]
