# Supplementary material for: Climatology of the terms and variables of transformed Eulerian-mean (TEM) equations from multiple reanalyses: MERRA-2, JRA-55, ERA-Interim, and CFSR
Source: Copernicus journal article supplement (doi:10.5194/acp-24-7873-2024), 2024-07-10

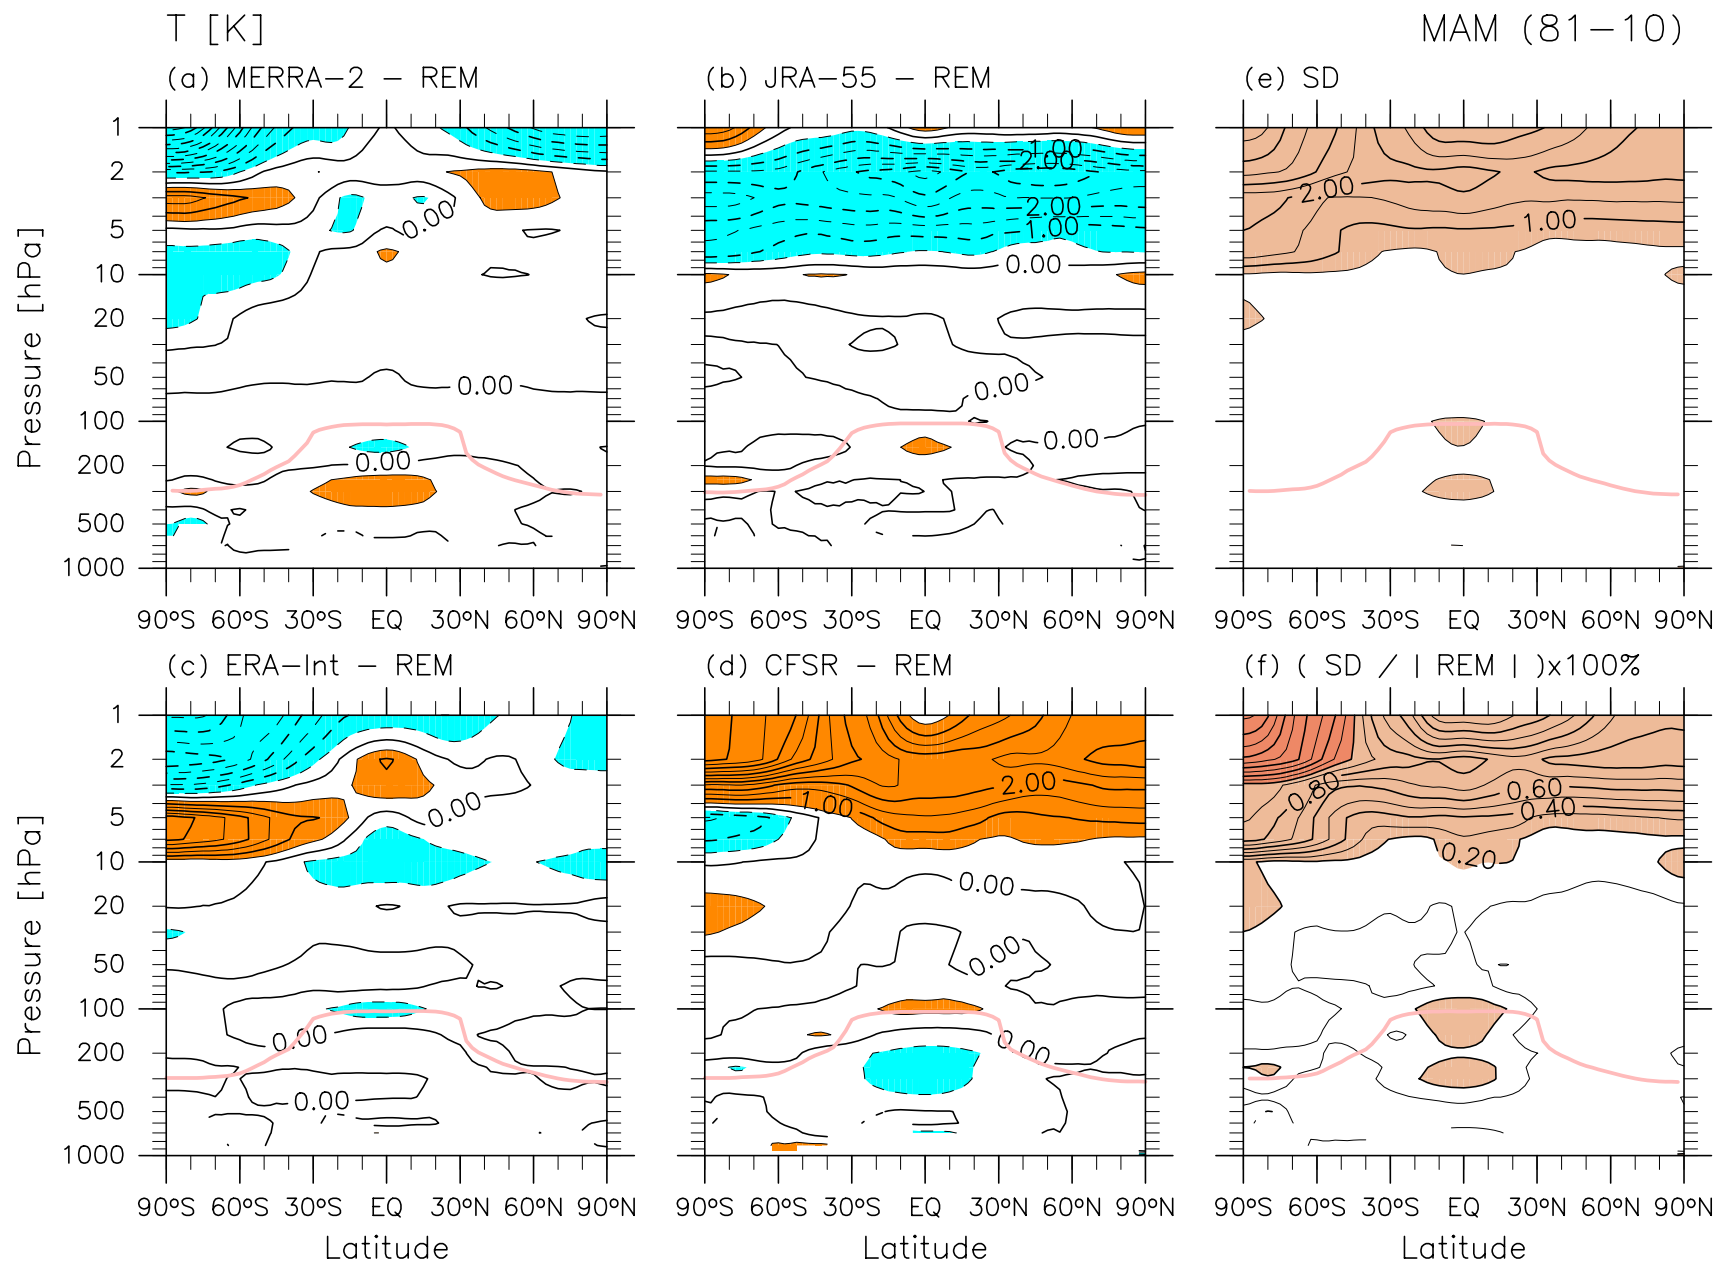

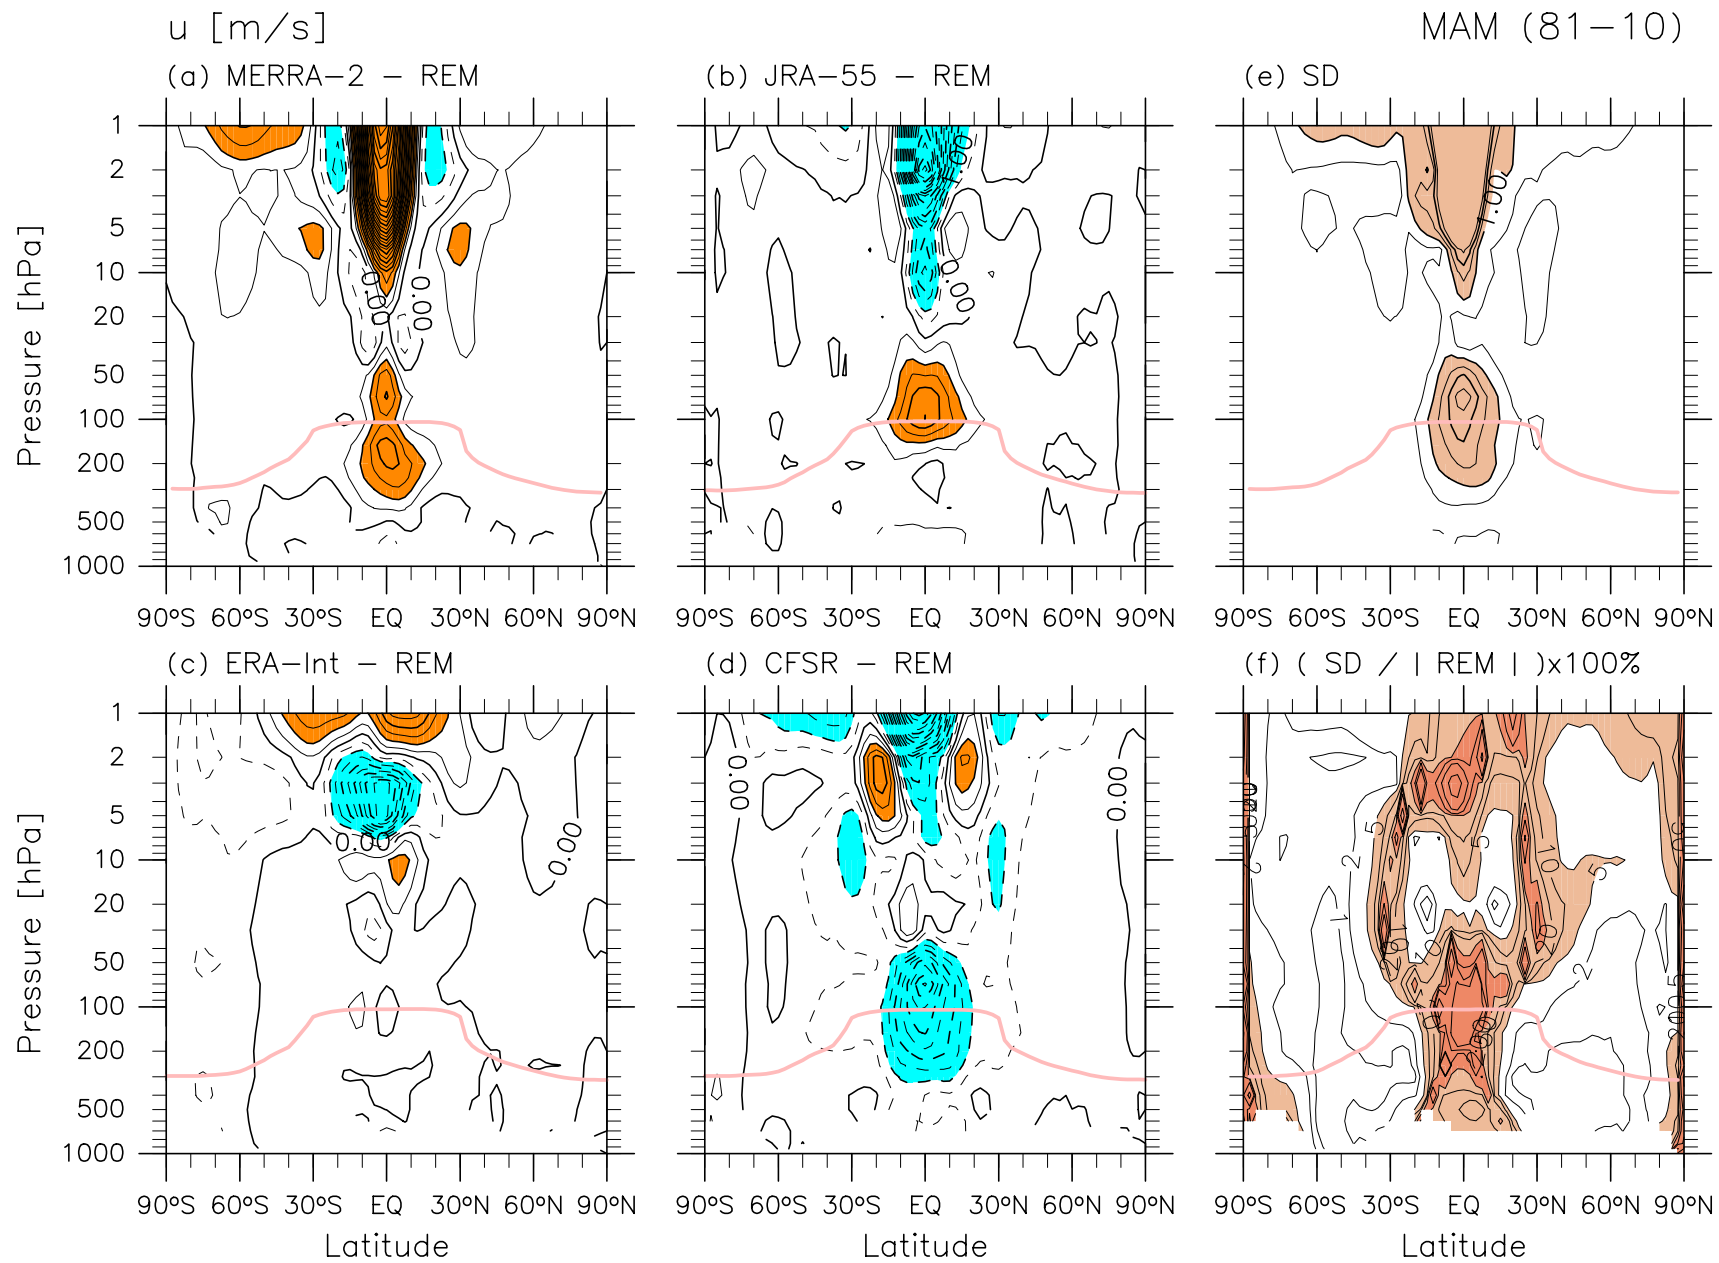

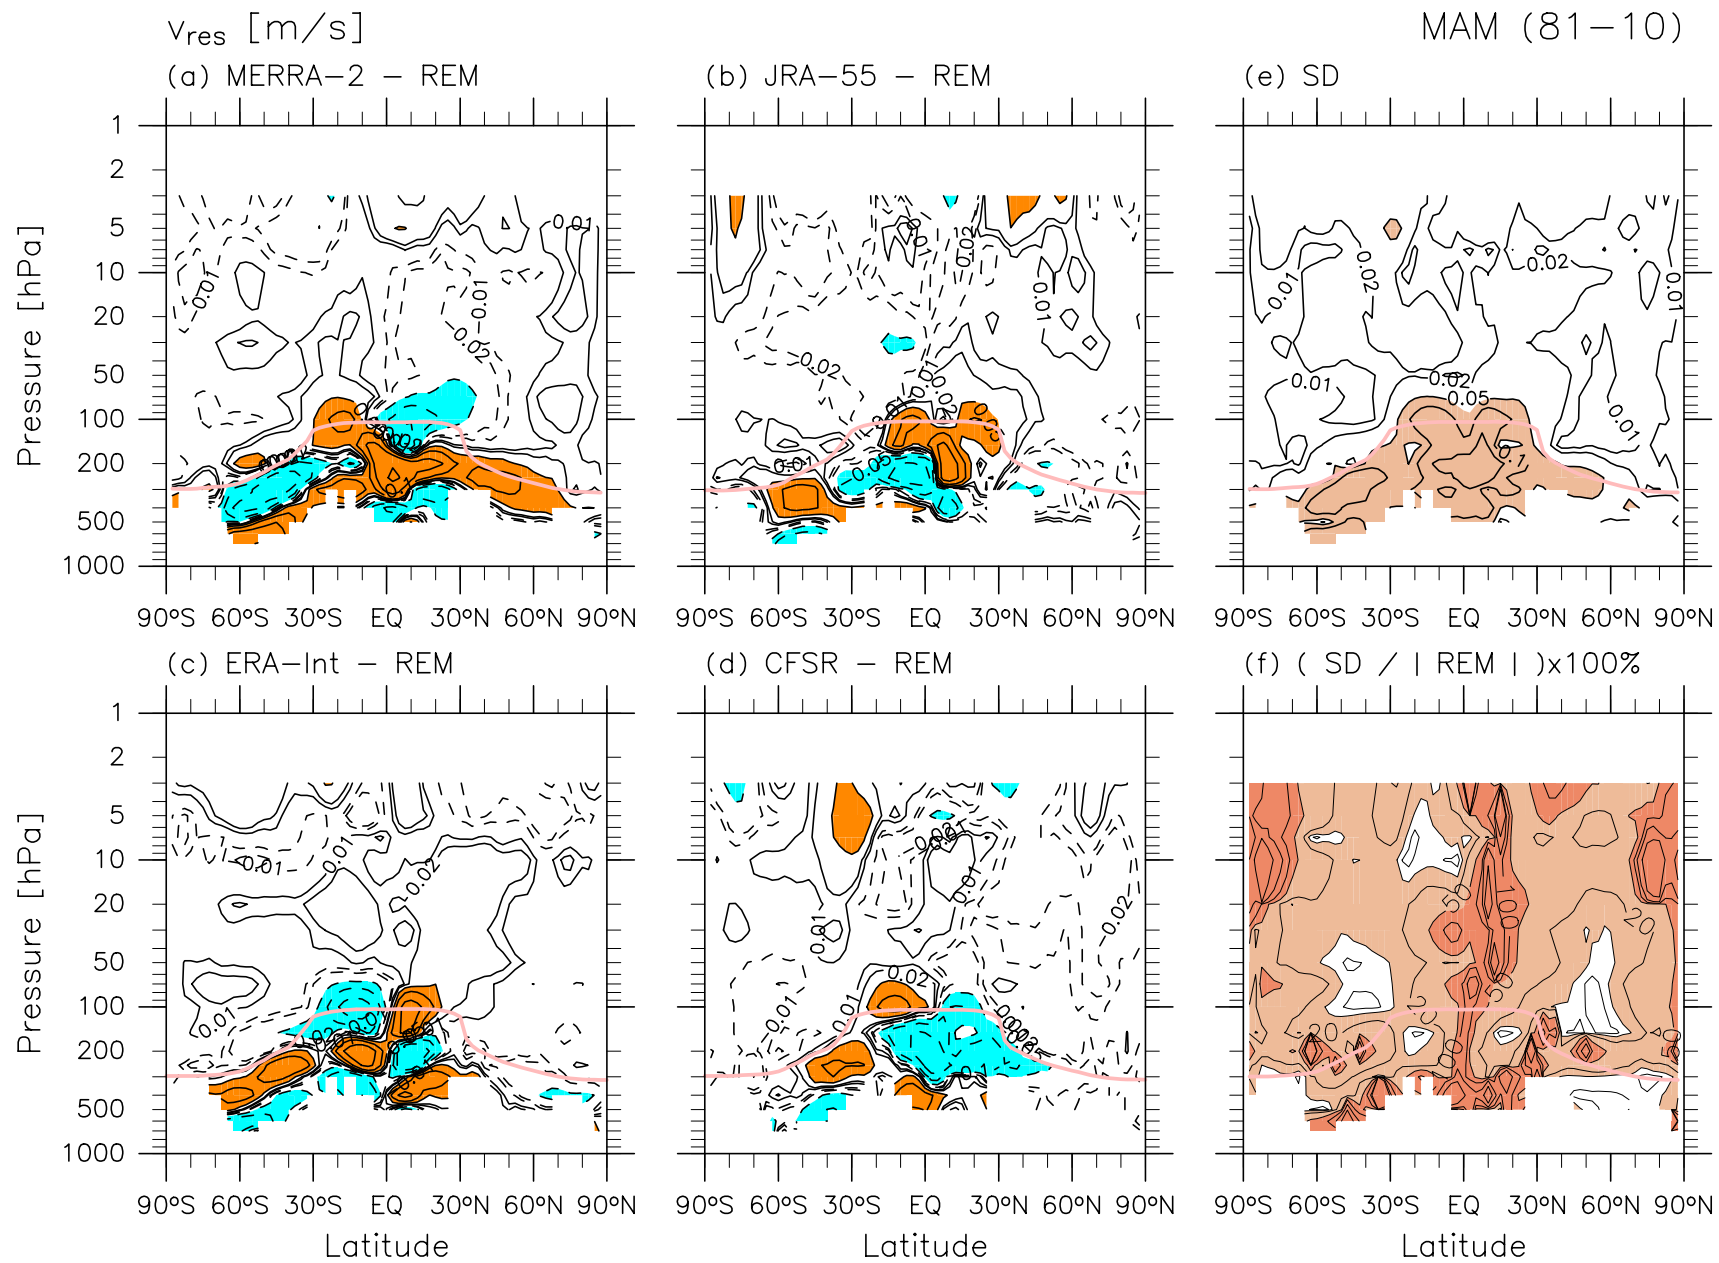

$\omega_{\text{res}}$  [mPa/s]

(a) MERRA-2 - REM

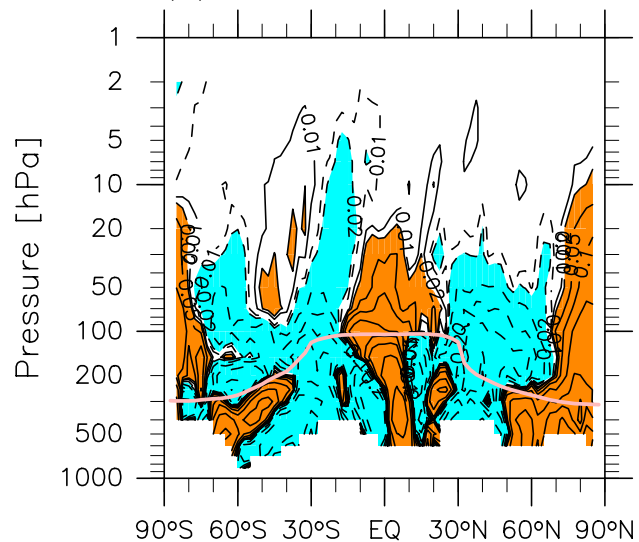

(b) JRA-55 - REM

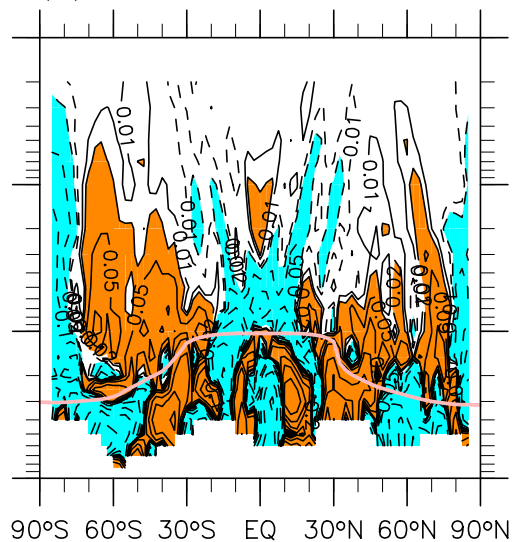

(e) SD

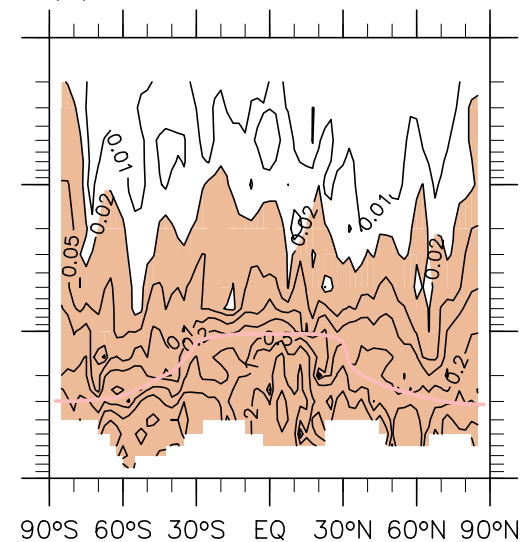

(c) ERA-Int - REM

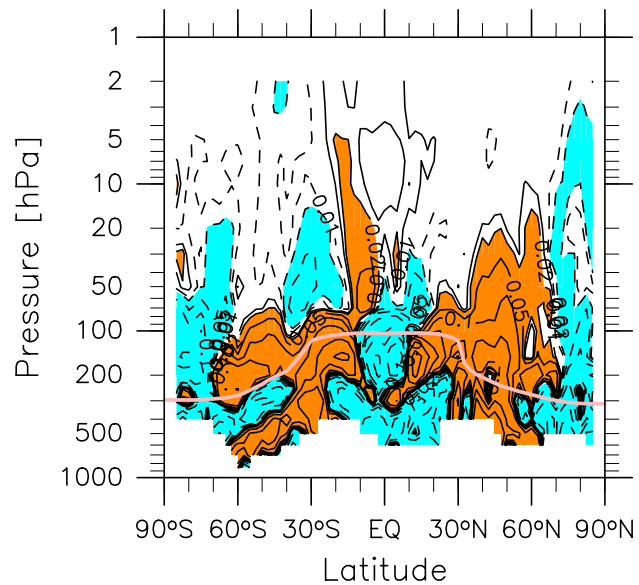

(d) CFSR - REM

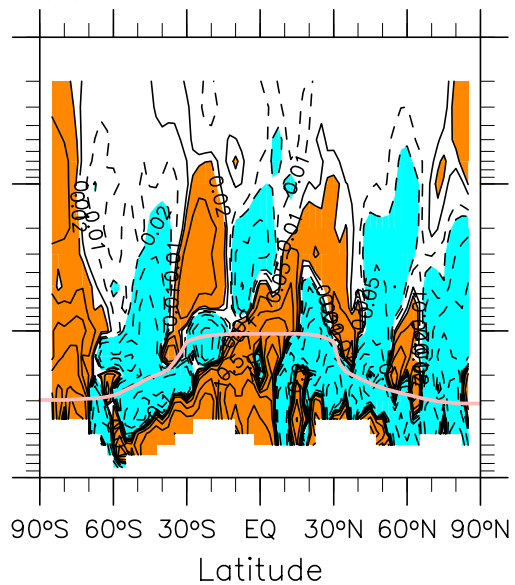

(f)  $(\text{SD} / |\text{REM}|) \times 100\%$

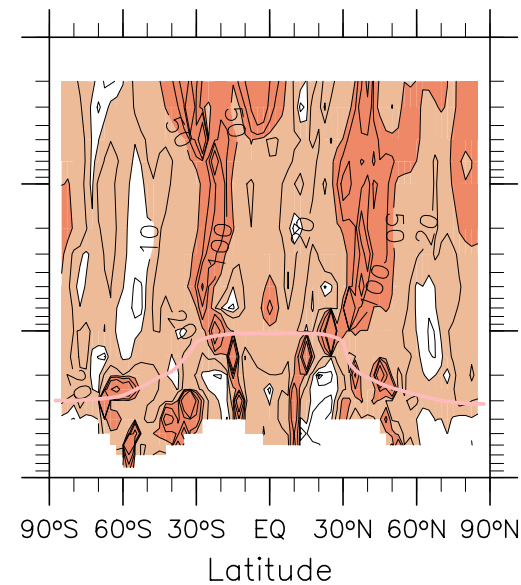

$w_{res}$  [mm/s]

(a) MERRA-2 - REM

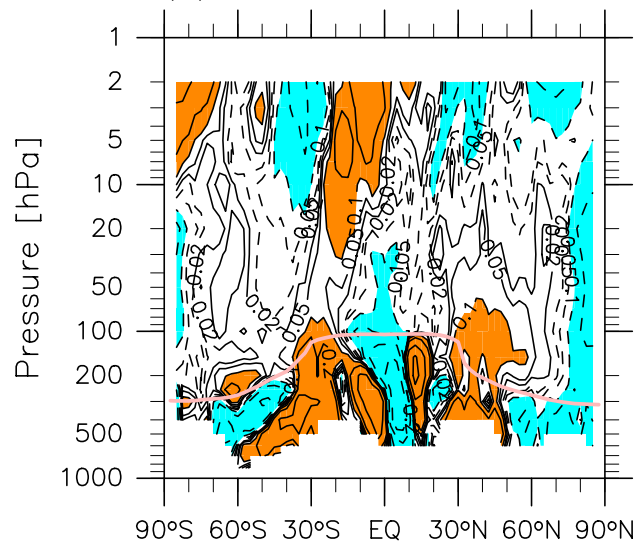

(b) JRA-55 - REM

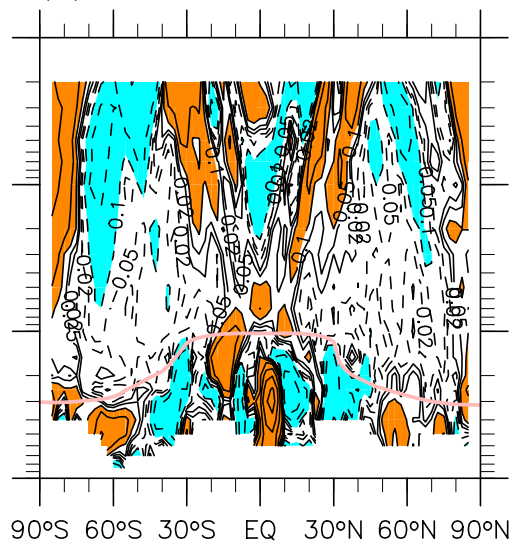

(e) SD

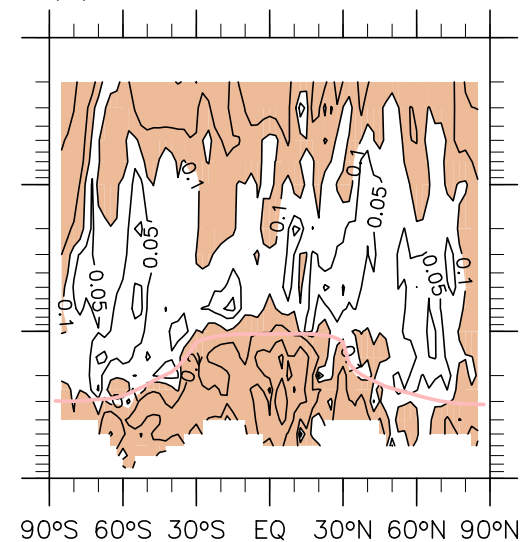

(c) ERA-Int - REM

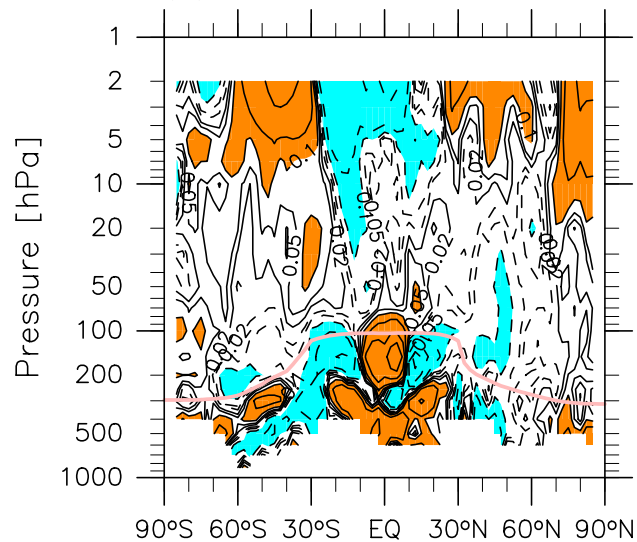

(d) CFSR - REM

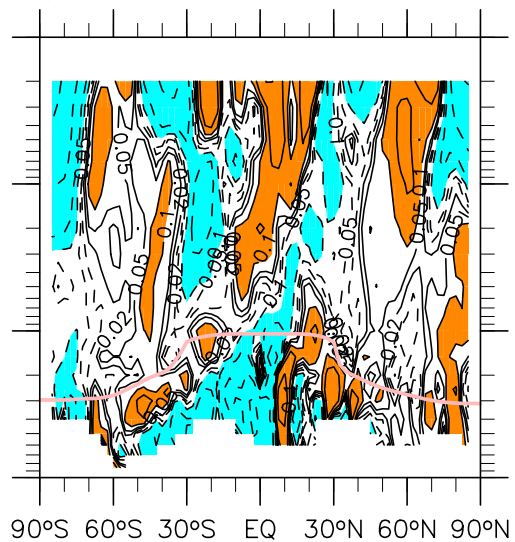

(f)  $(SD / |REM|) \times 100\%$

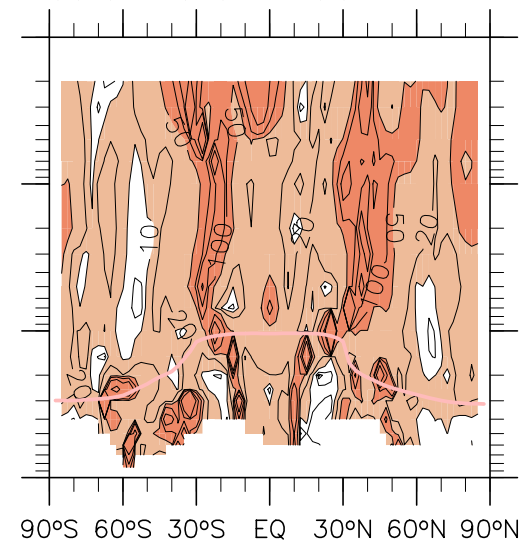

MAM (81-10)

Latitude

Latitude

Latitude



$\psi_{\text{vres}}$  [kg/m/s]

MAM (81–10)

(a) MERRA-2 – REM

(b) JRA-55 – REM

(e) SD

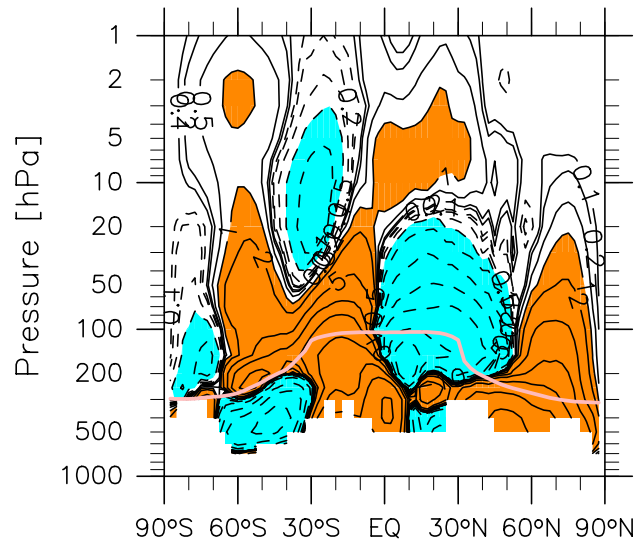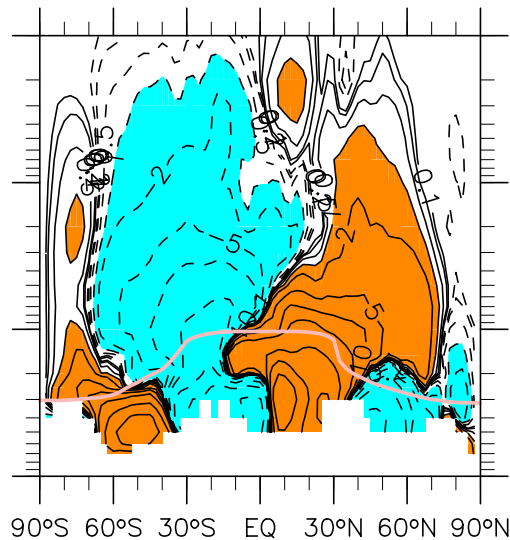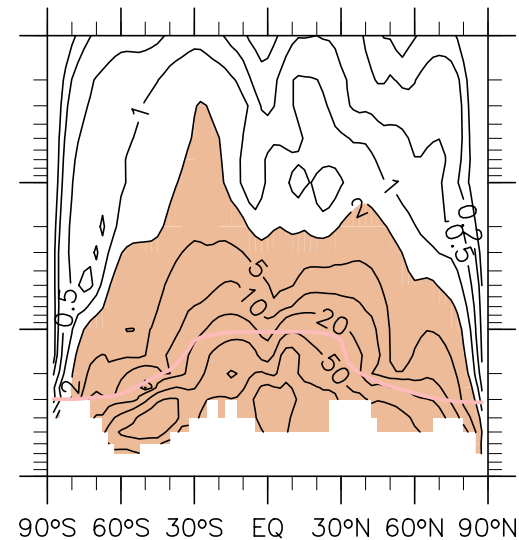

(c) ERA-Int – REM

(d) CFSR – REM

(f)  $(\text{SD} / |\text{REM}|) \times 100\%$

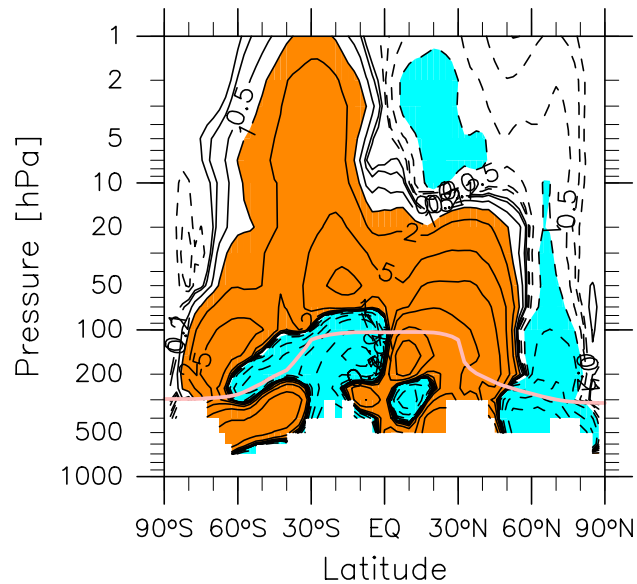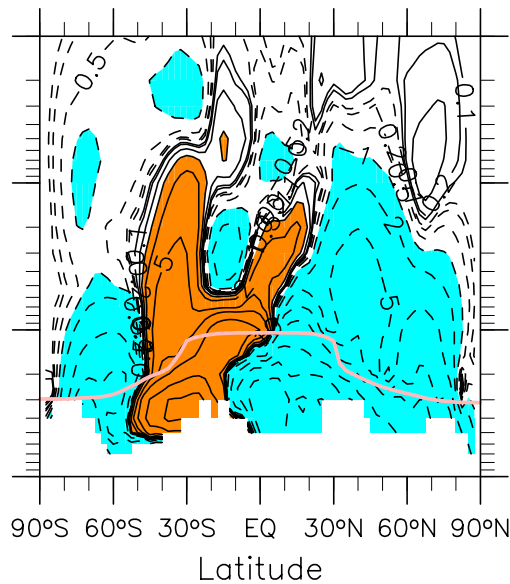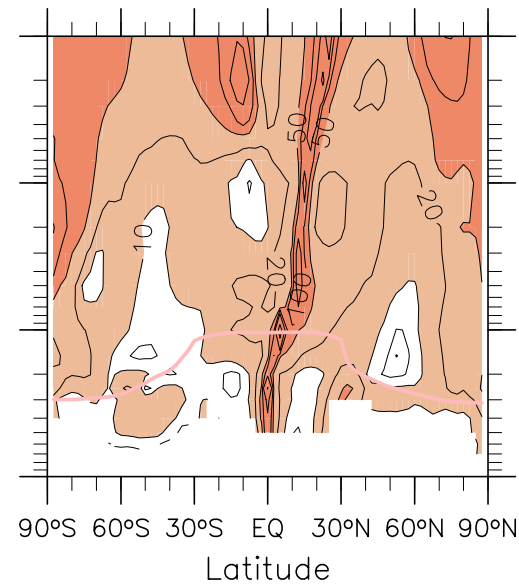

$\psi_{\text{wres}}$  [kg/m/s]

(a) MERRA-2 - REM

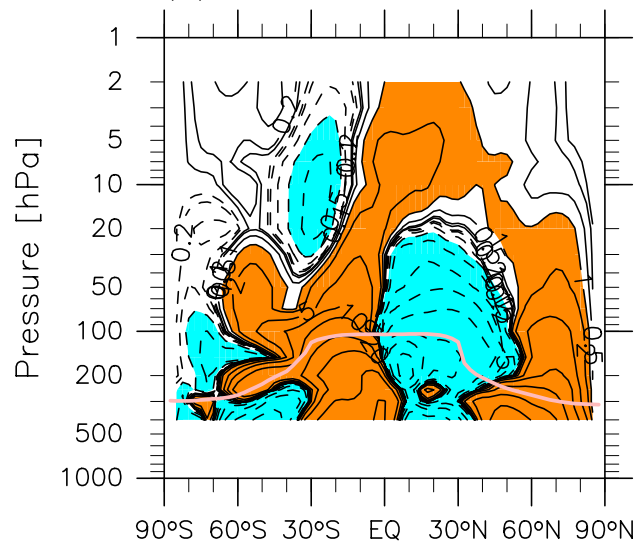

(b) JRA-55 - REM

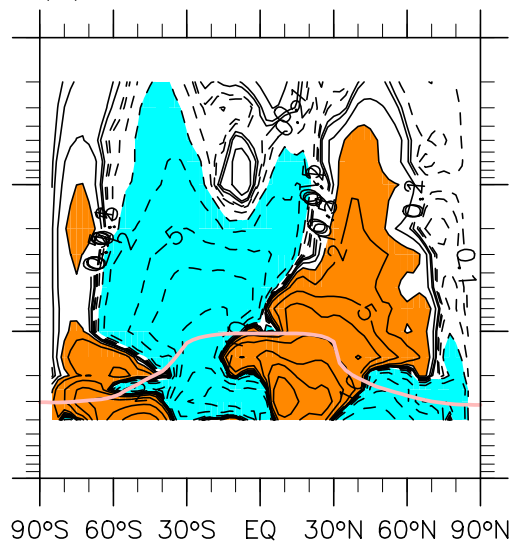

(e) SD

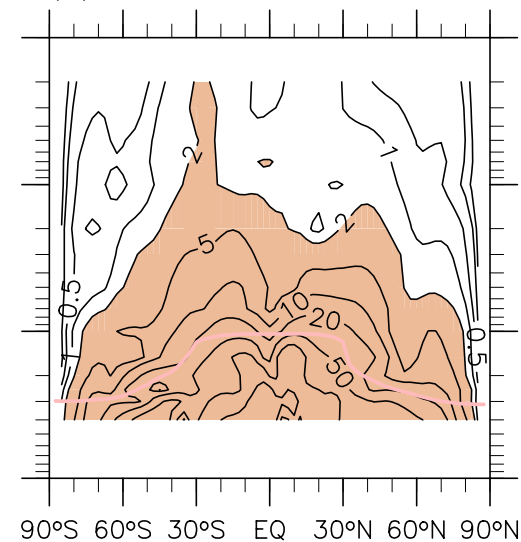

(c) ERA-Int - REM

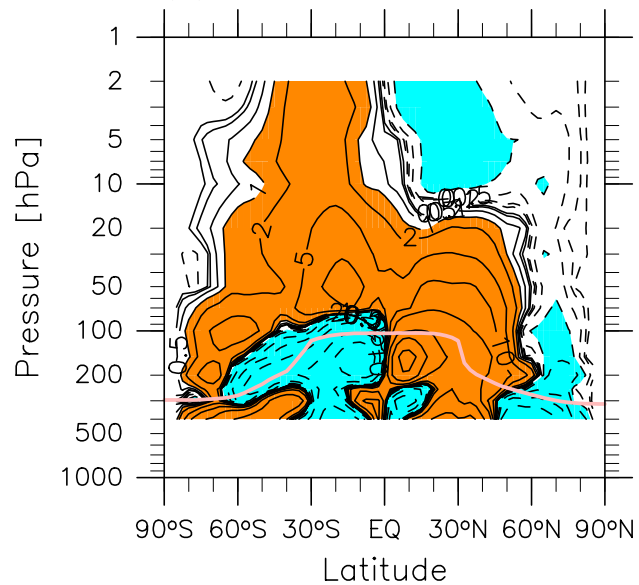

(d) CFSR - REM

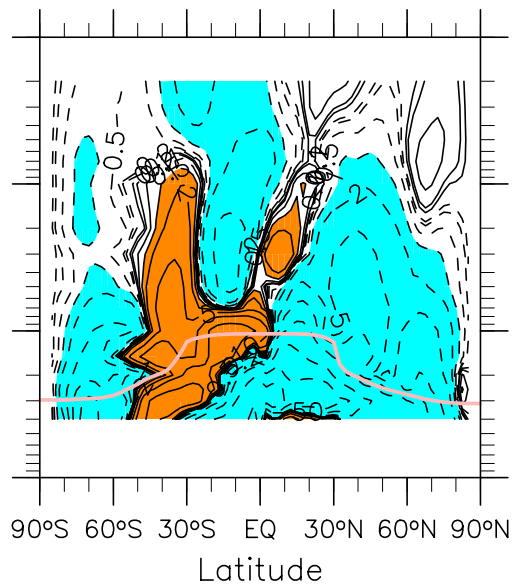

(f)  $(\text{SD} / |\text{REM}|) \times 100\%$

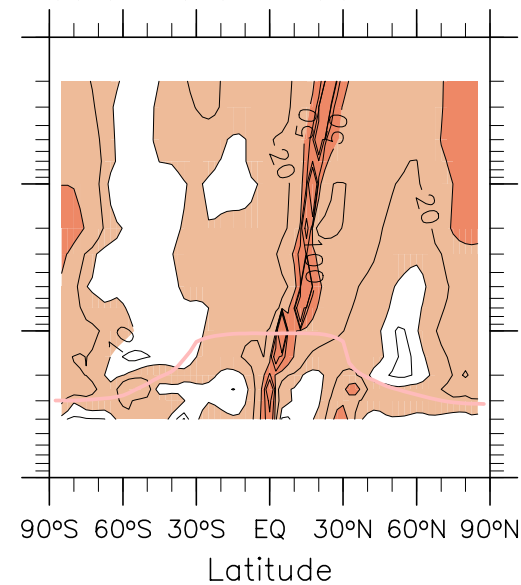

MAM (81-10)

Q\_longwave [K/d]

(a) MERRA-2 - REM

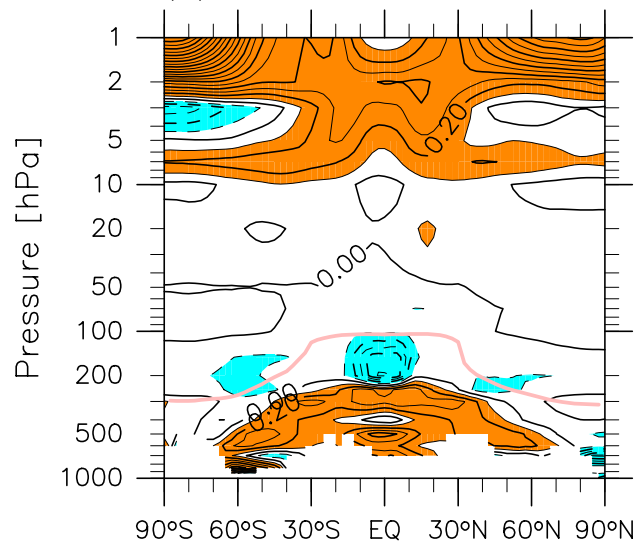

(b) JRA-55 - REM

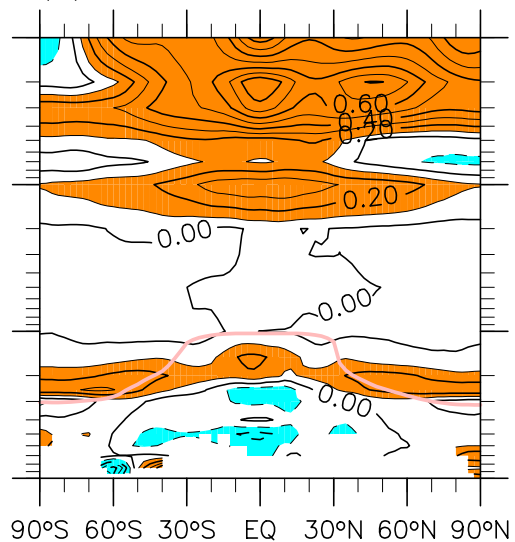

MAM (81-10)

(e) SD

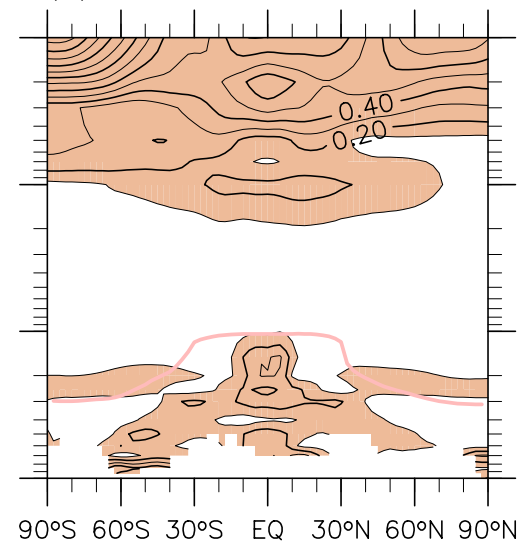

(c) ERA-Int - REM

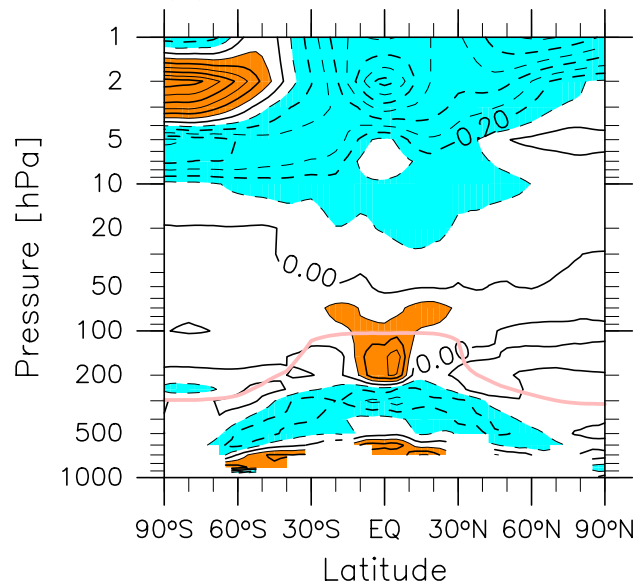

(d) CFSR - REM

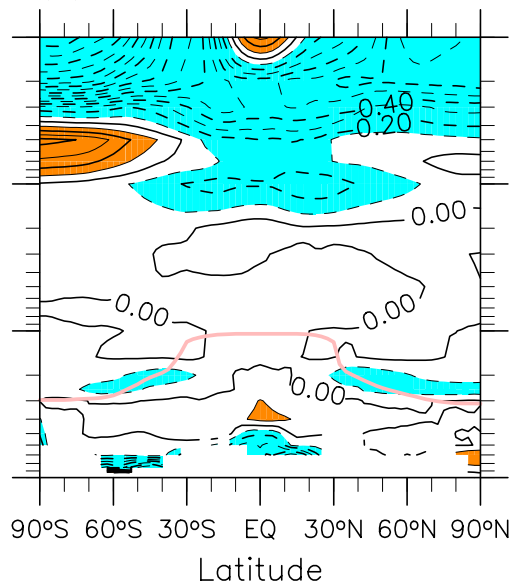

(f) ( SD / | REM | ) x 100%

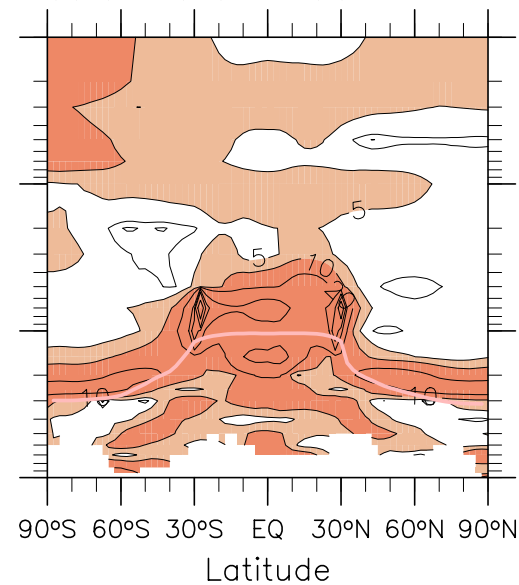



Q\_shortwave [K/d]

(a) MERRA-2 - REM

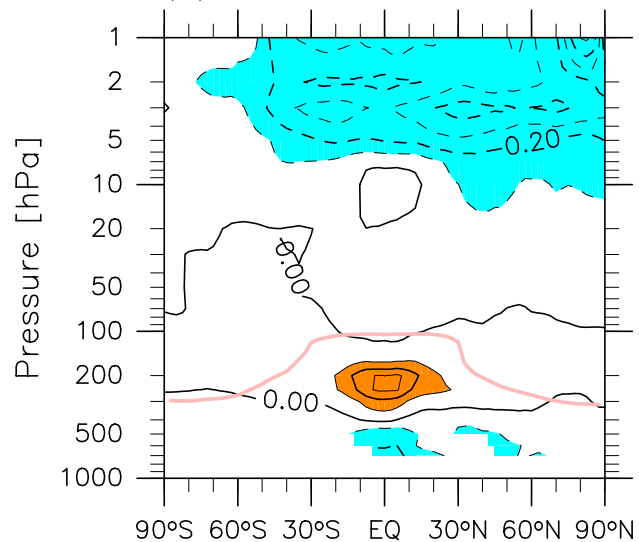

(b) JRA-55 - REM

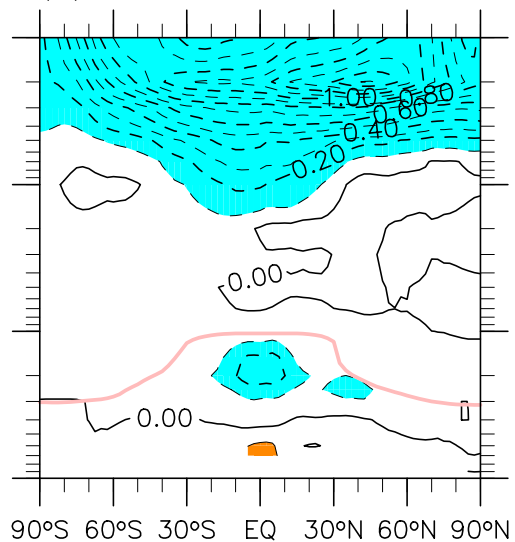

MAM (81-10)

(e) SD

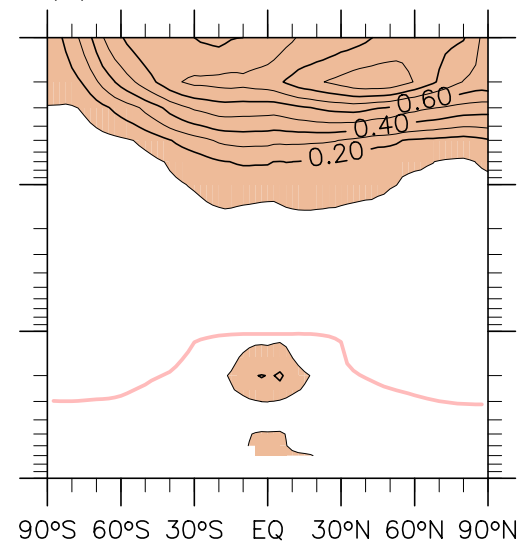

(c) ERA-Int - REM

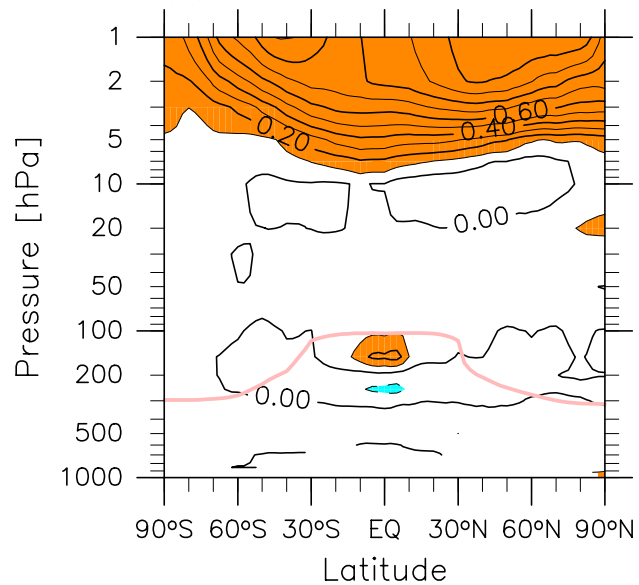

(d) CFSR - REM

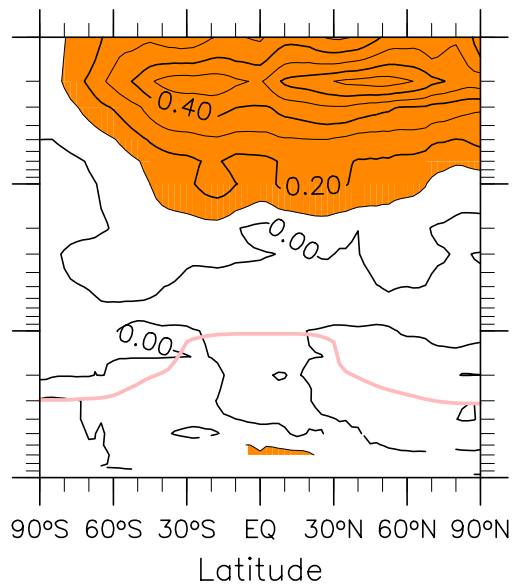

(f) ( SD / | REM | ) x 100%

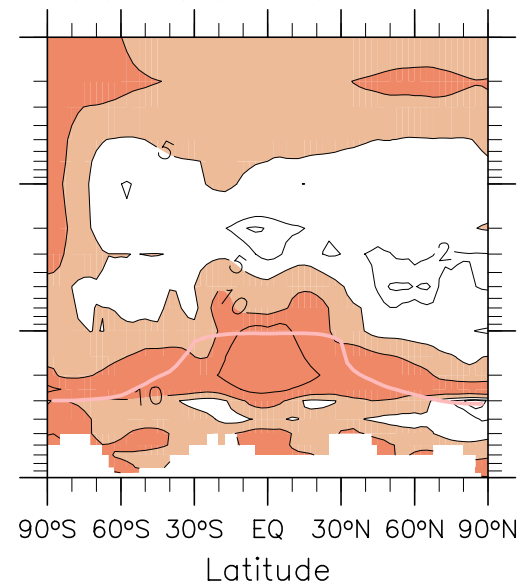

$Q_{\text{total}} - Q_{\text{rad}}$  [K/d]

(a) MERRA-2 - REM

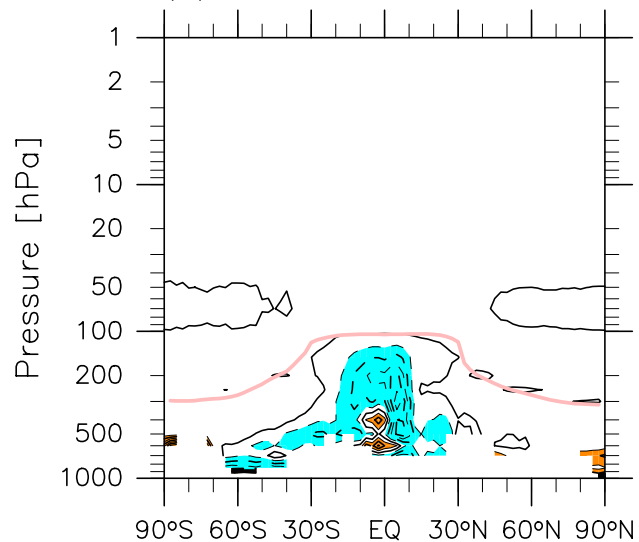

(b) JRA-55 - REM

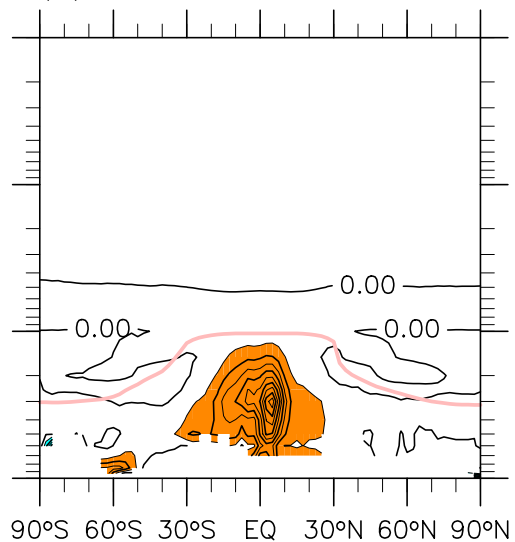

(e) SD

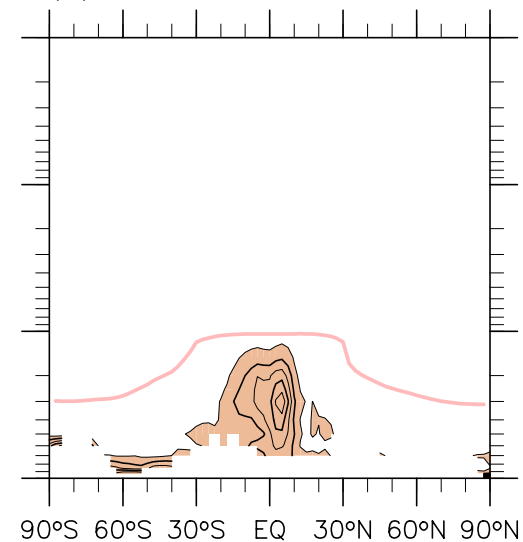

(c) ERA-Int - REM

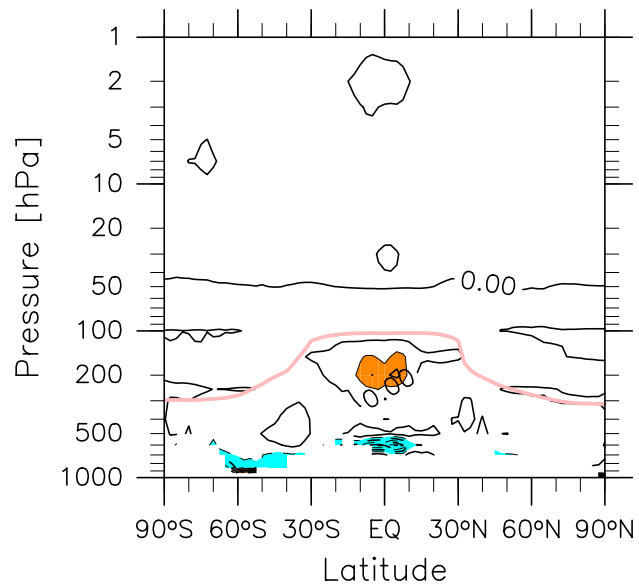

(d) CFSR - REM

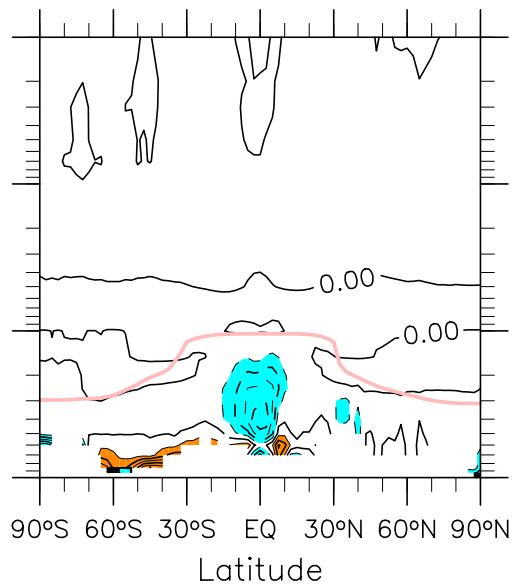

(f)  $(SD / |REM|) \times 100\%$

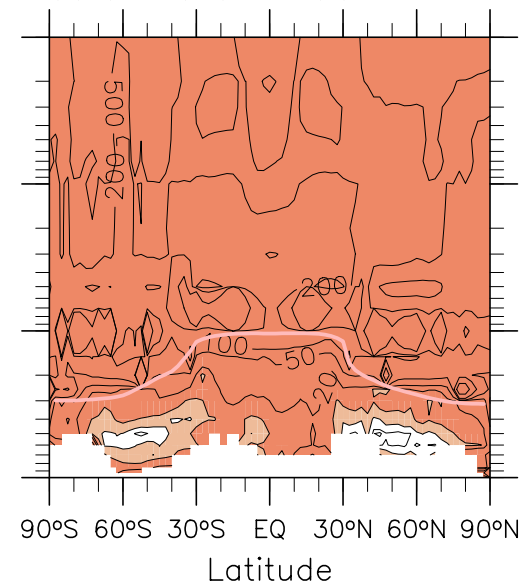

Ozone [ppmv]

(a) MERRA-2 - REM

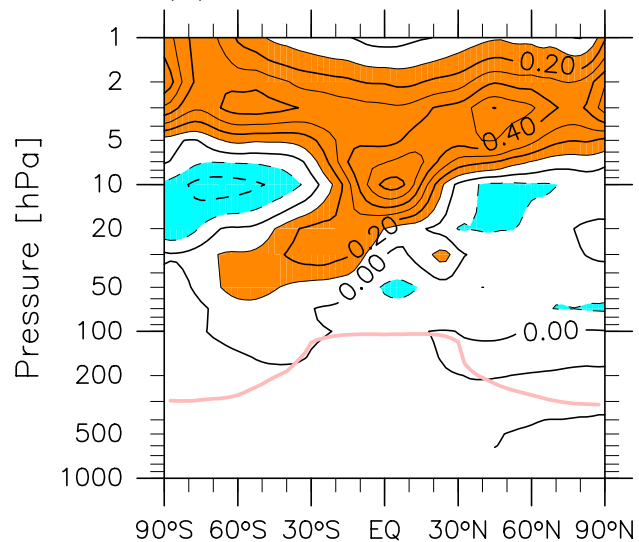

(b) JRA-55 - REM

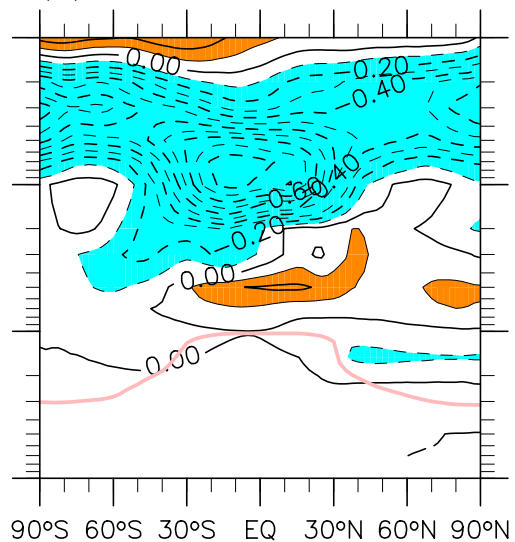

MAM (81-10)

(e) SD

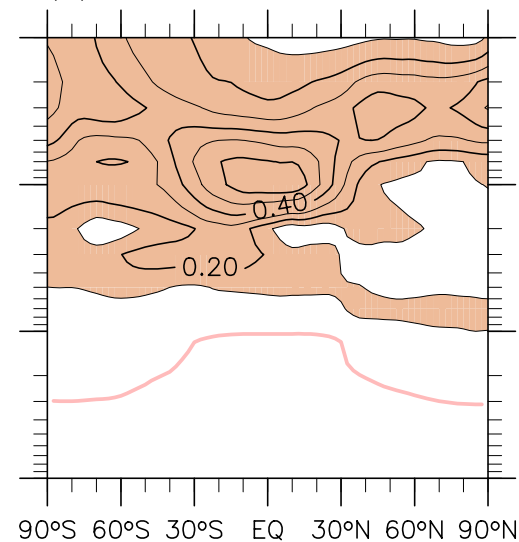

(c) ERA-Int - REM

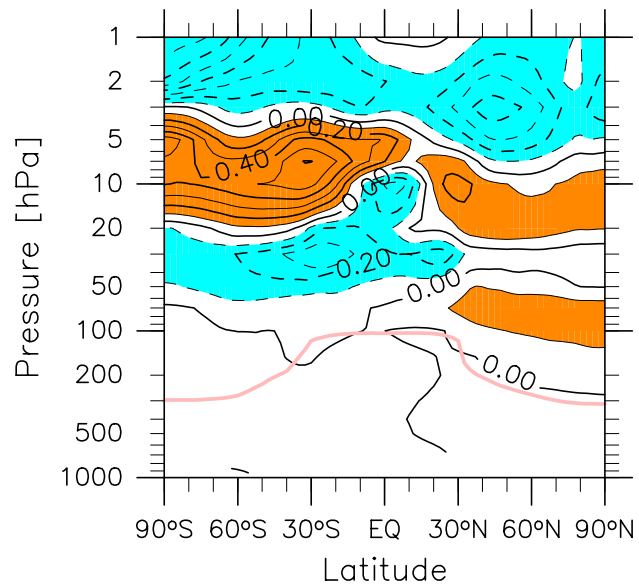

(d) CFSR - REM

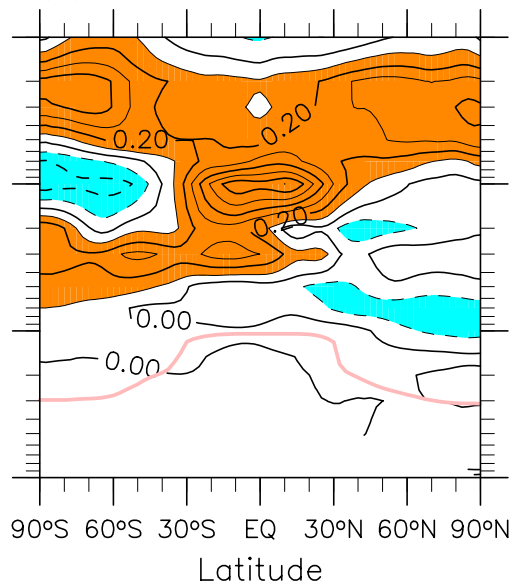

(f) ( SD / | REM | ) x 100%

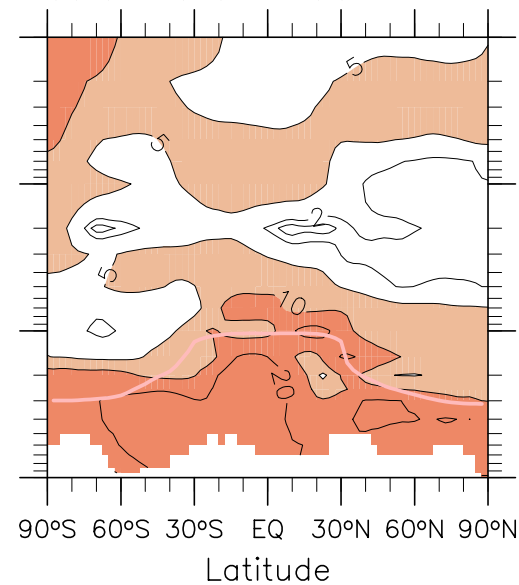

$+f_v^*$

MAM (81-10)

(a) MERRA-2 - REM

(b) JRA-55 - REM

(e) SD

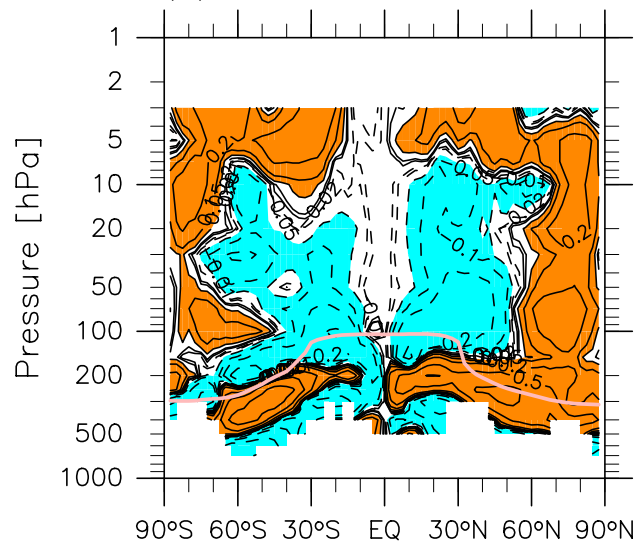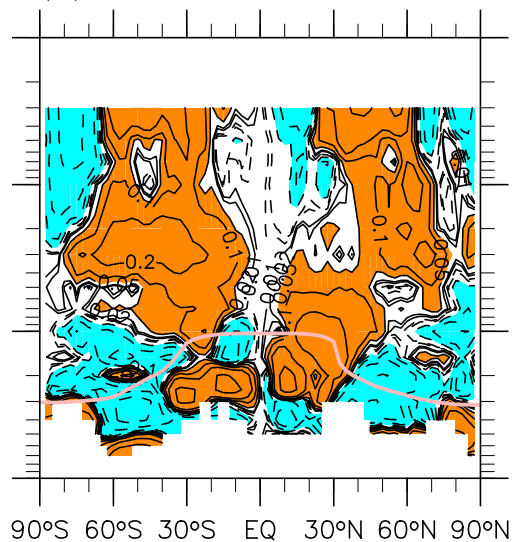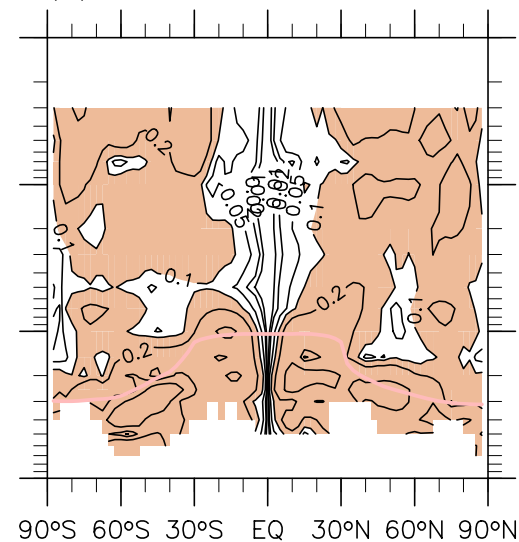

(c) ERA-Int - REM

(d) CFSR - REM

(f)  $(SD / |REM|) \times 100\%$

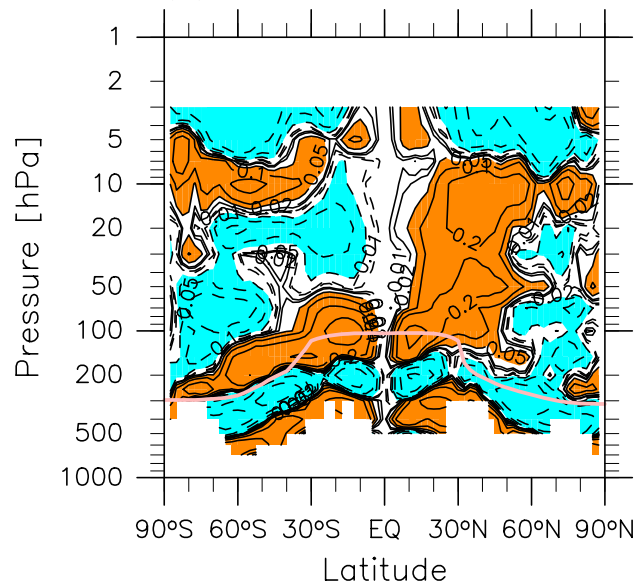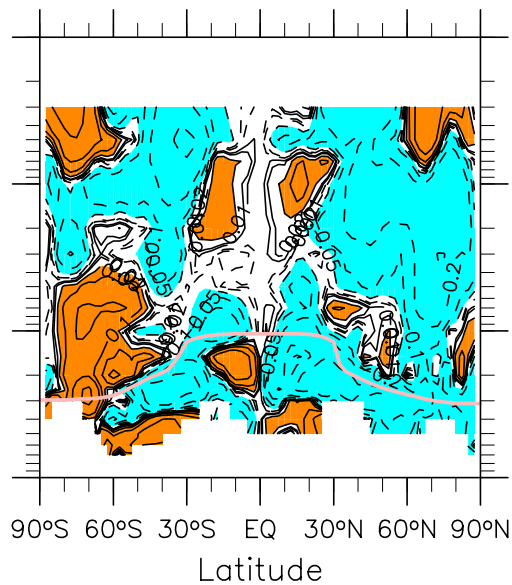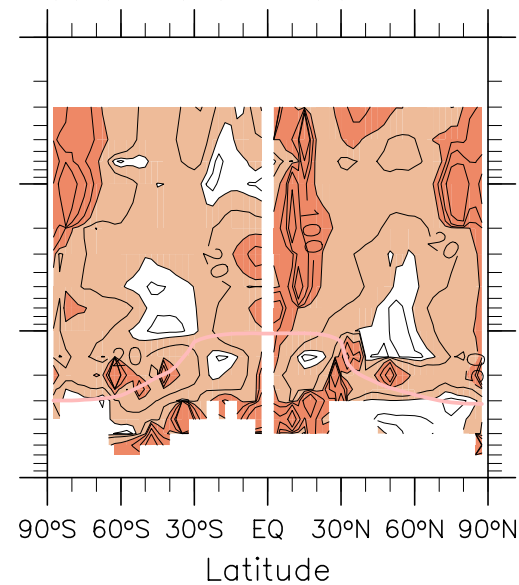

$$+fv^* - v^* \partial u / \partial y - \omega^* \partial u / \partial p$$

MAM (81–10)

(a) MERRA-2 – REM

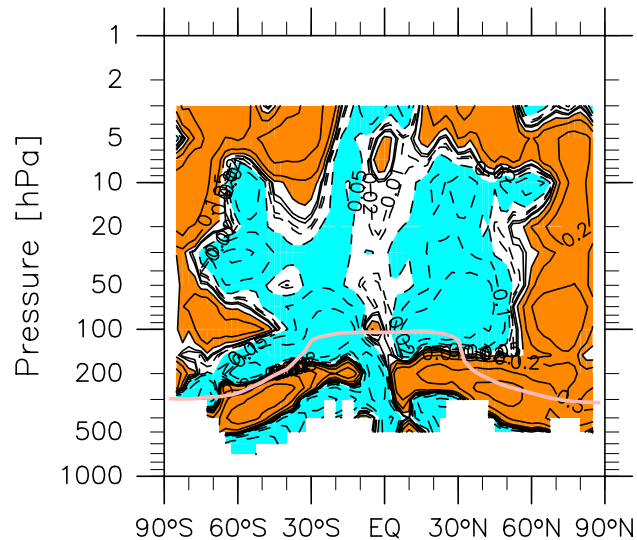

(b) JRA-55 – REM

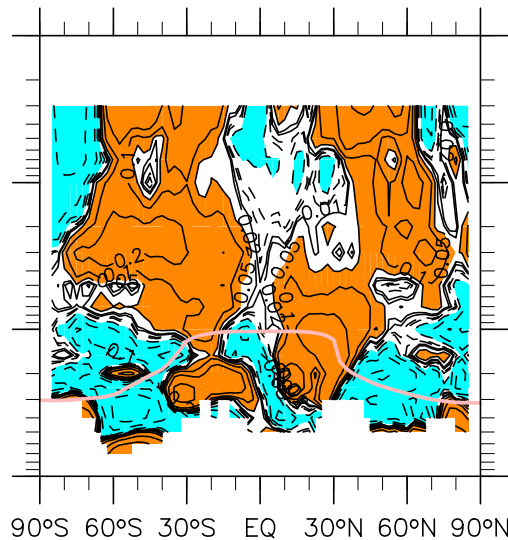

(e) SD

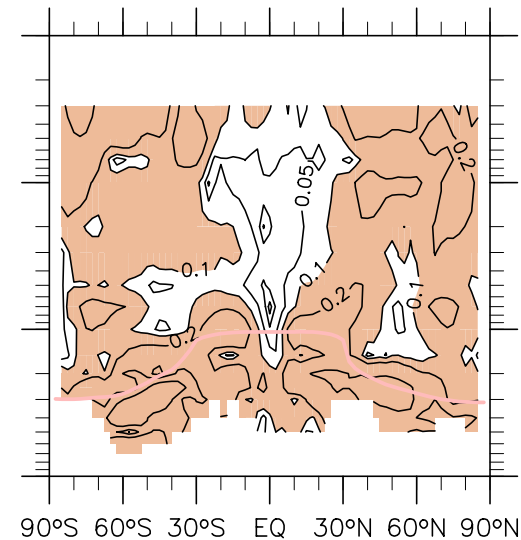

(c) ERA-Int – REM

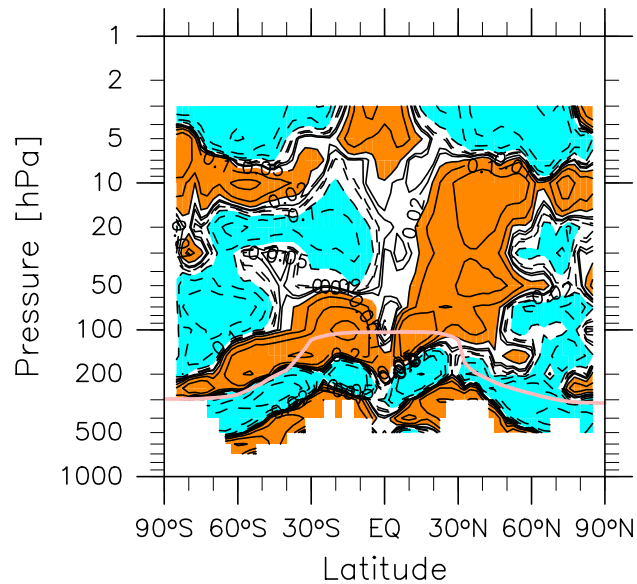

(d) CFSR – REM

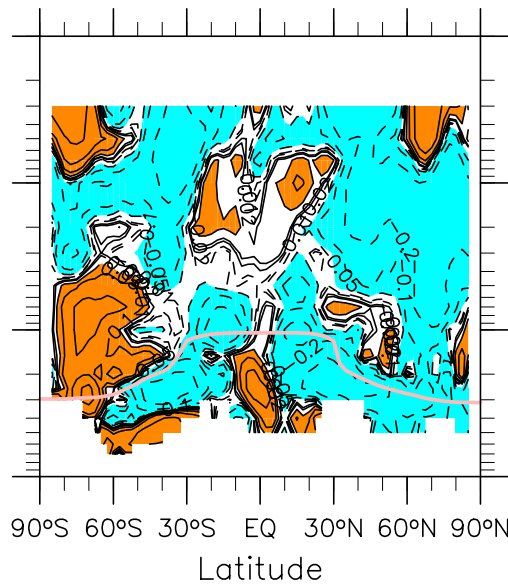

(f) ( SD / | REM | ) x 100%

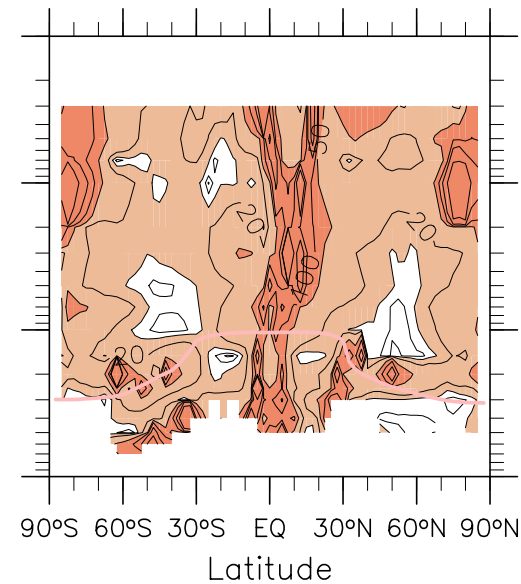



EPFD

(a) MERRA-2 — REM

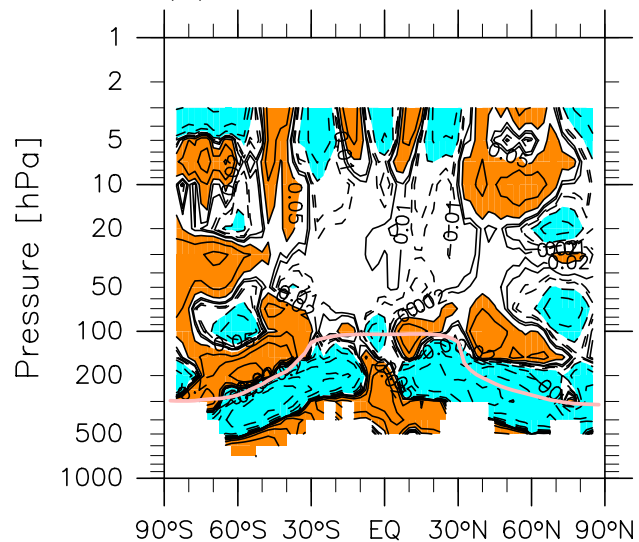

(b) JRA-55 — REM

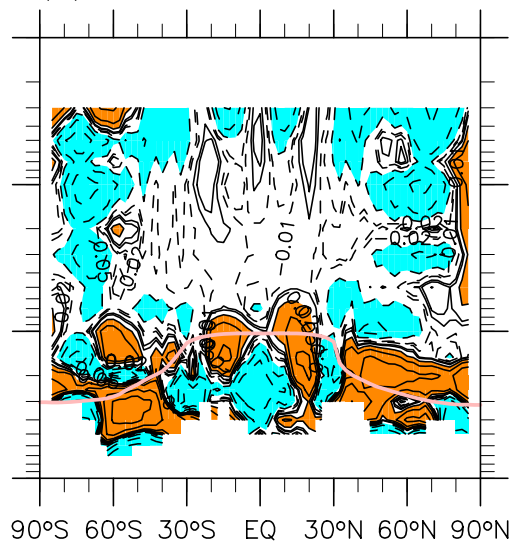

(c) ERA-Int — REM

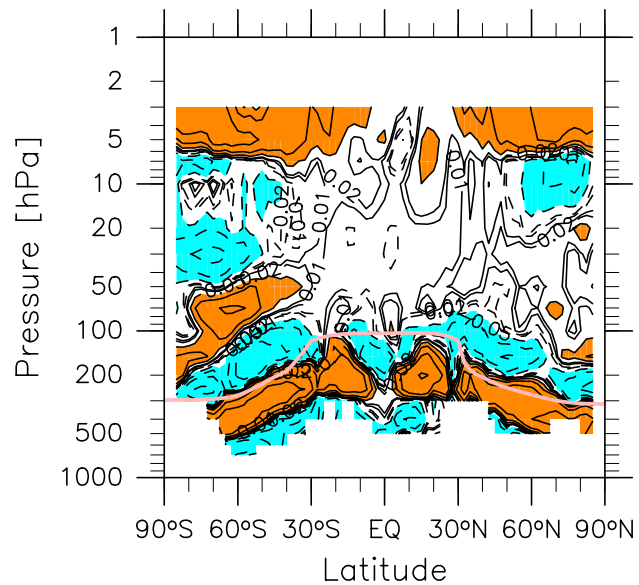

(d) CFSR — REM

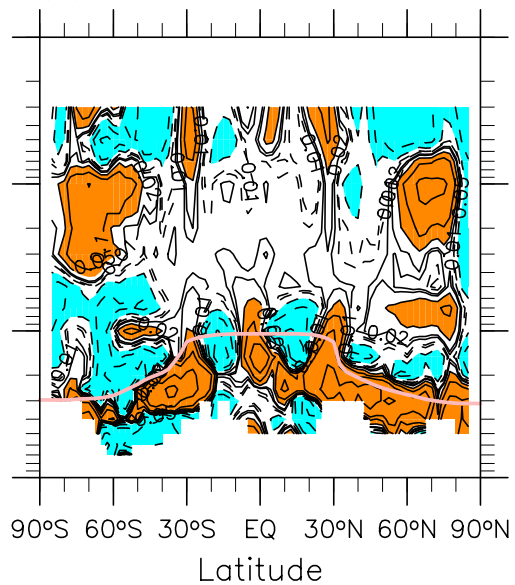

MAM (81—10)

(e) SD

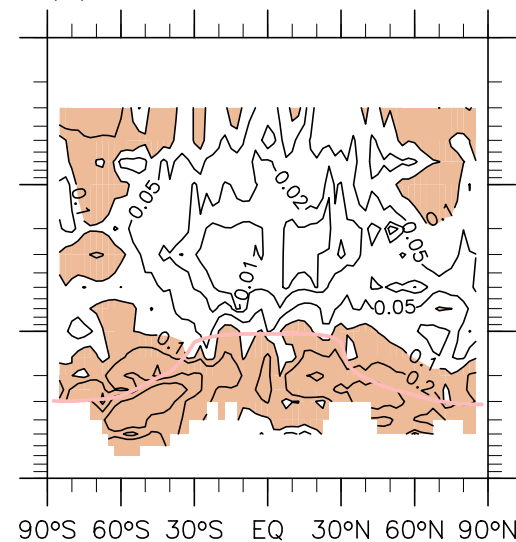

(f)  $(SD / |REM|) \times 100\%$

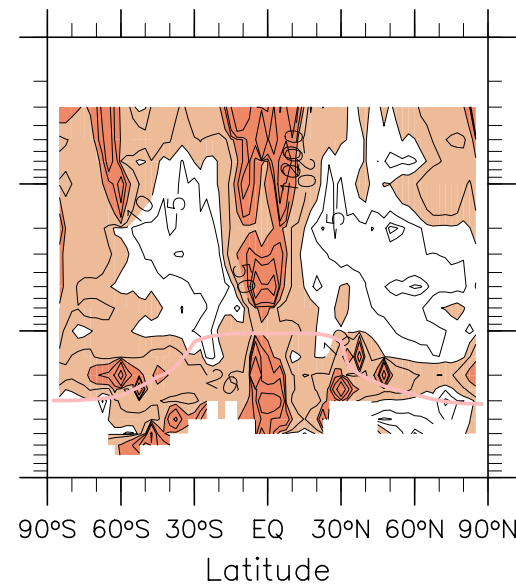

Residual\_u

MAM (81-10)

(a) MERRA-2 - REM

(b) JRA-55 - REM

(e) SD

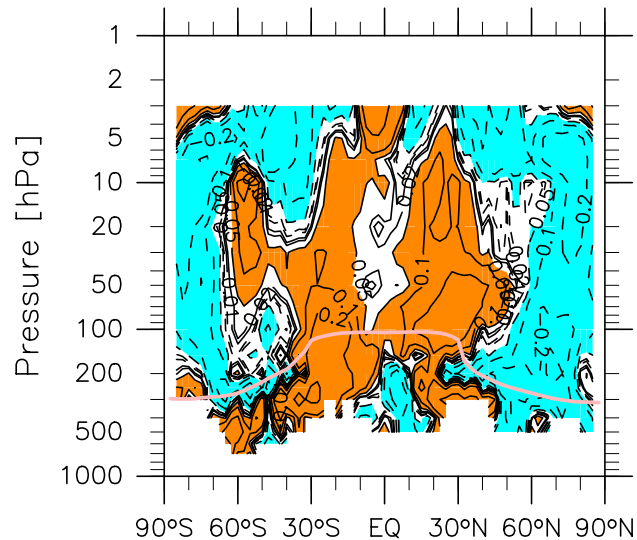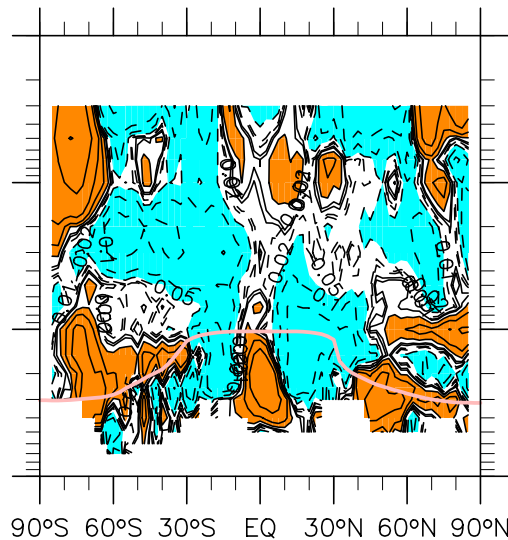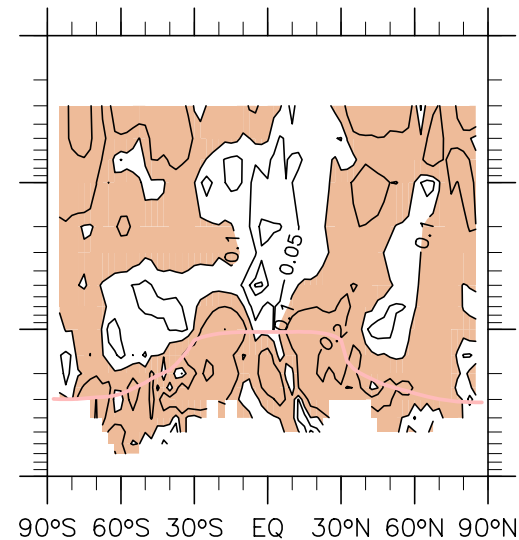

(c) ERA-Int - REM

(d) CFSR - REM

(f)  $(SD / |REM|) \times 100\%$

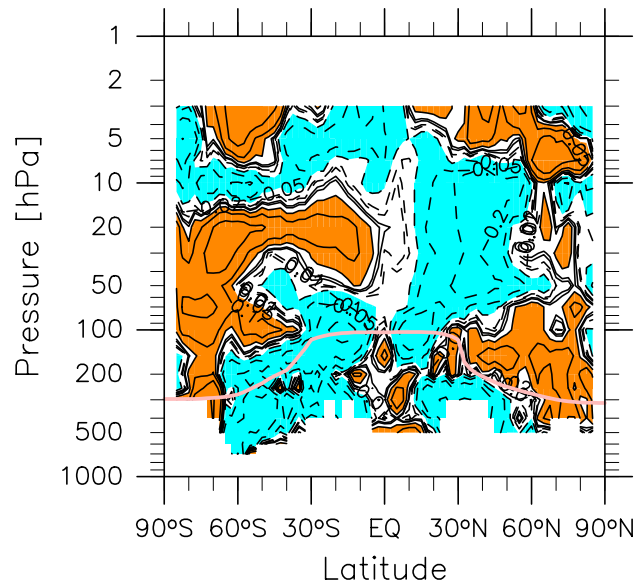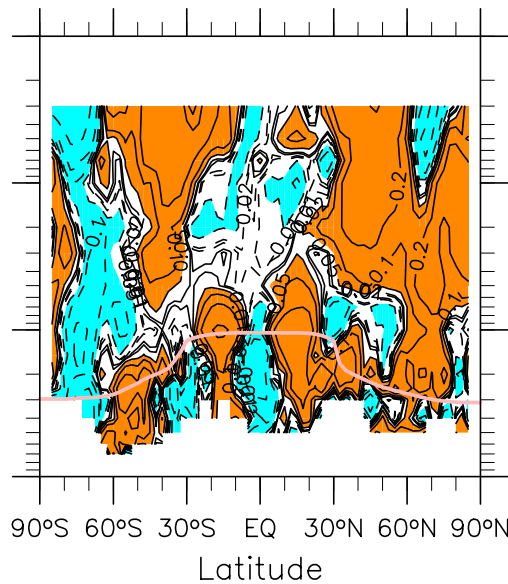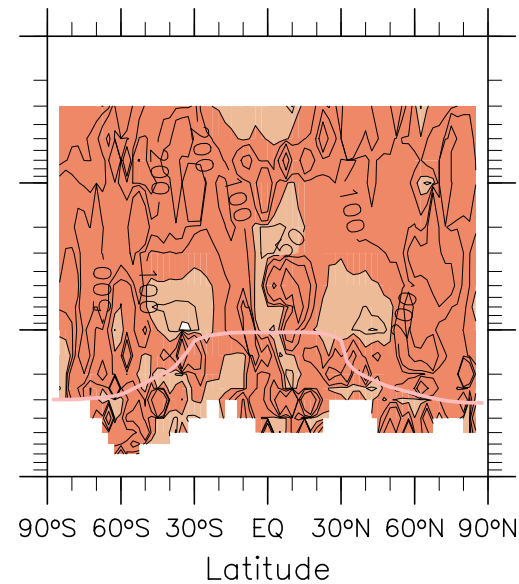

$$-\omega^* \partial\Theta/\partial p$$

MAM (81-10)

(a) MERRA-2 - REM

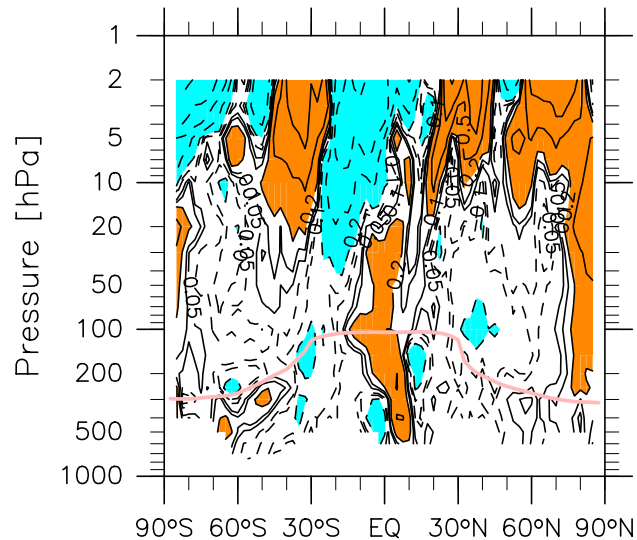

(b) JRA-55 - REM

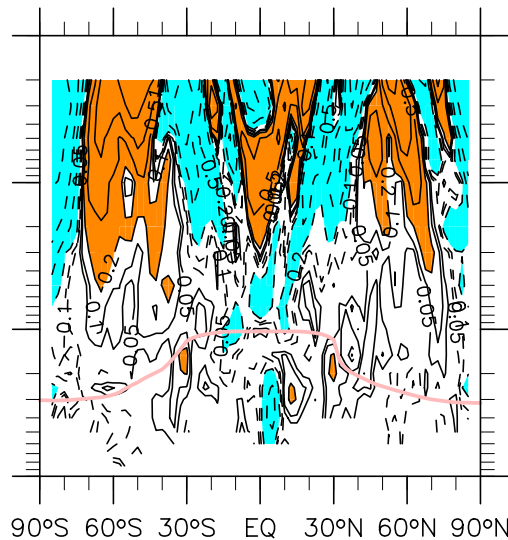

(e) SD

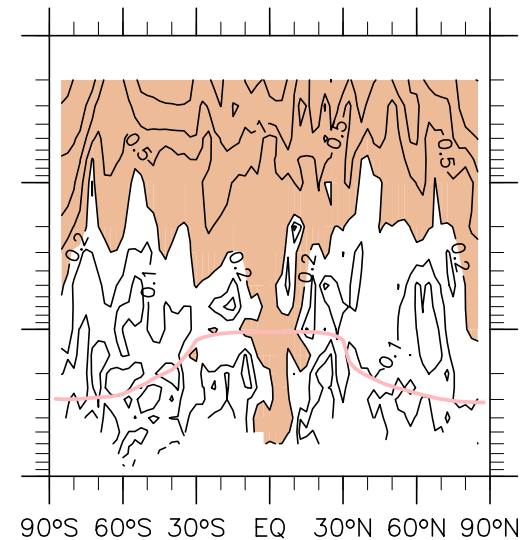

(c) ERA-Int - REM

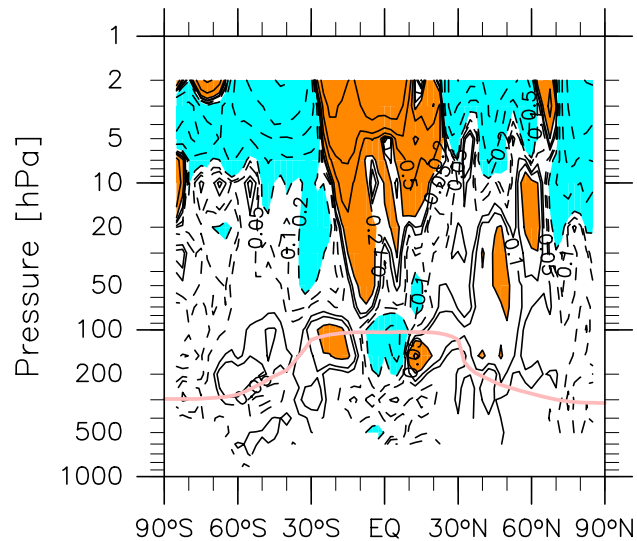

(d) CFSR - REM

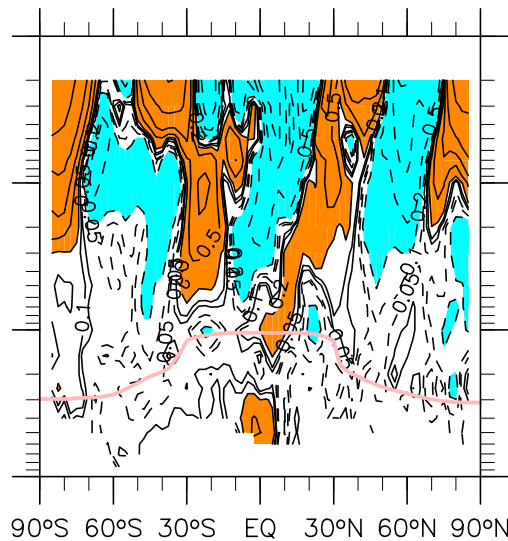

(f) ( SD / | REM | ) x 100%

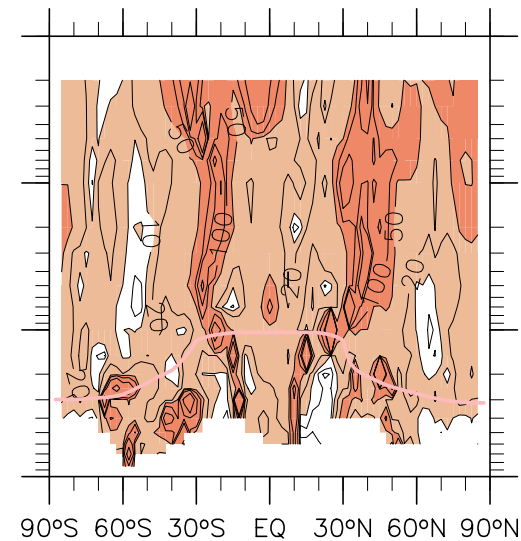

Latitude

Latitude

Latitude

Q<sub>total</sub>

MAM (81–10)

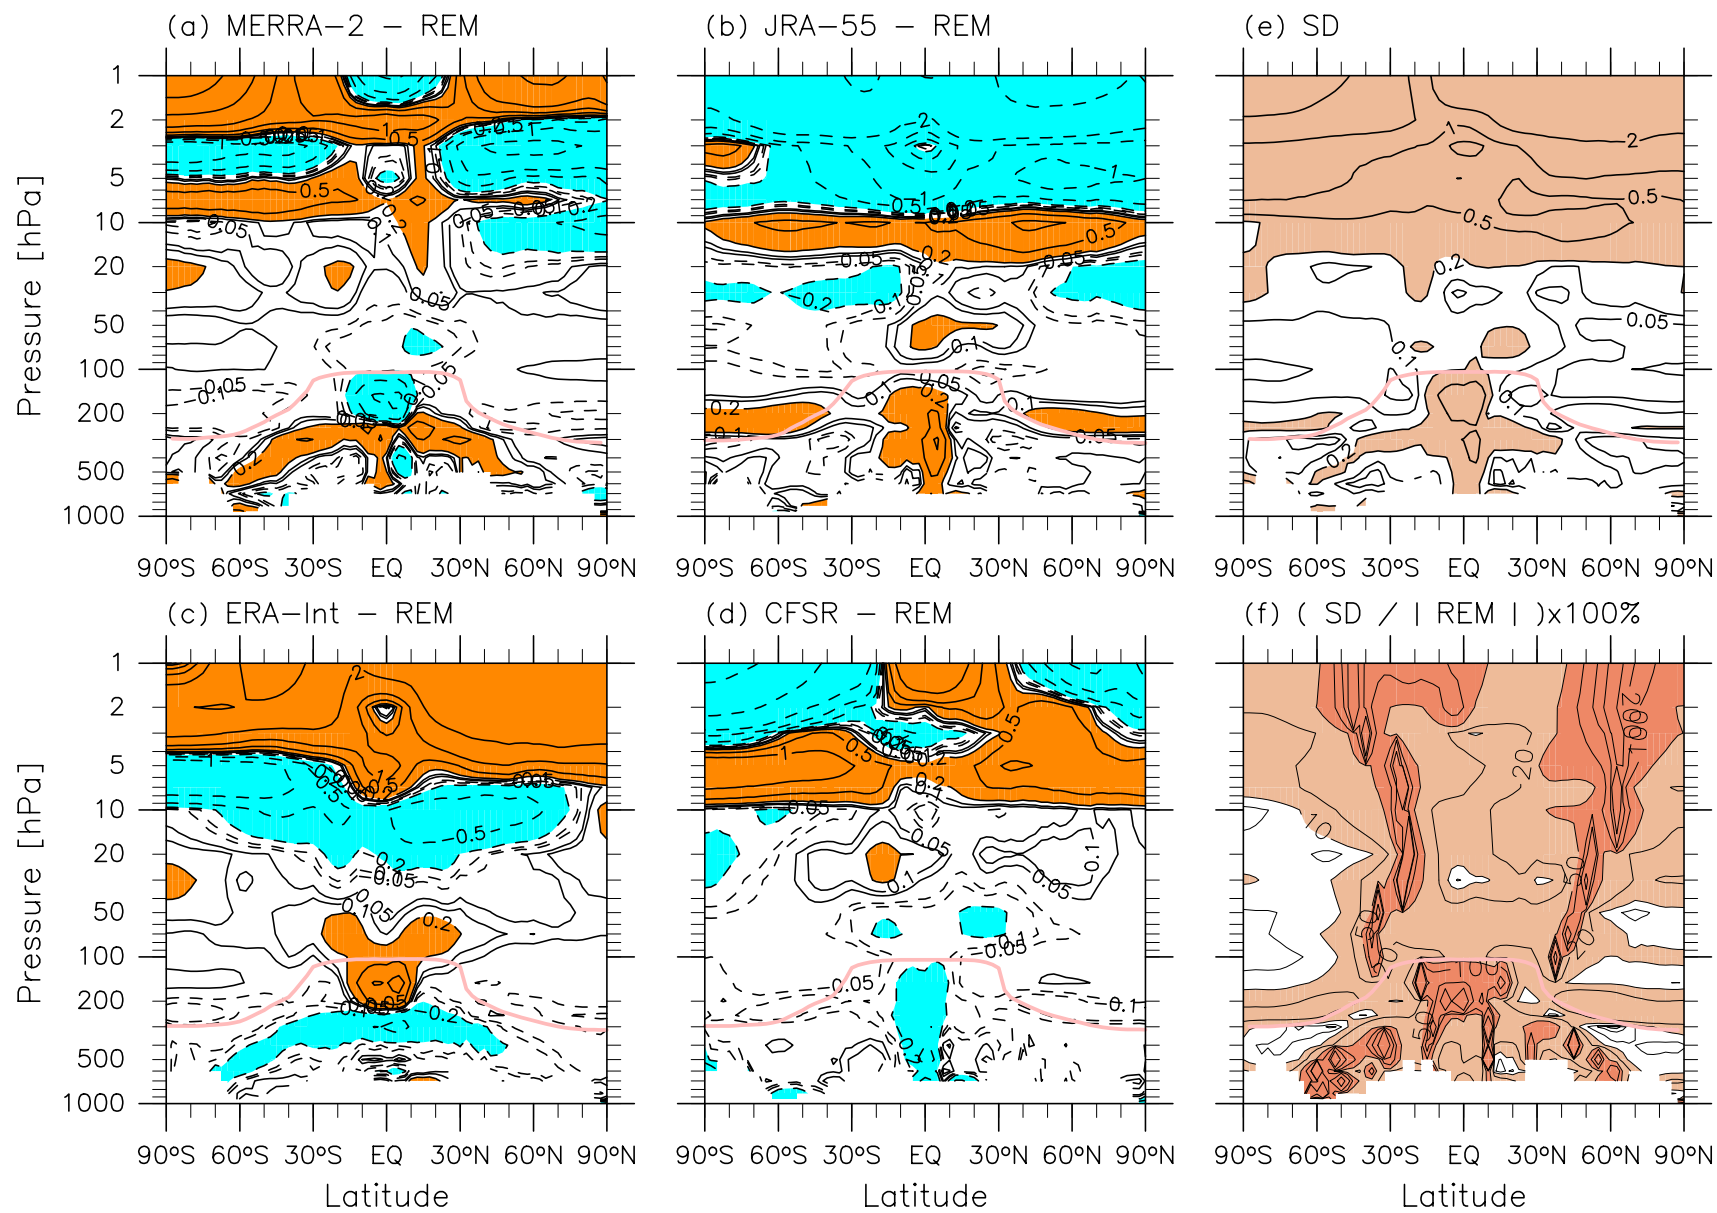



Residual\_Θ

(a) MERRA-2 - REM

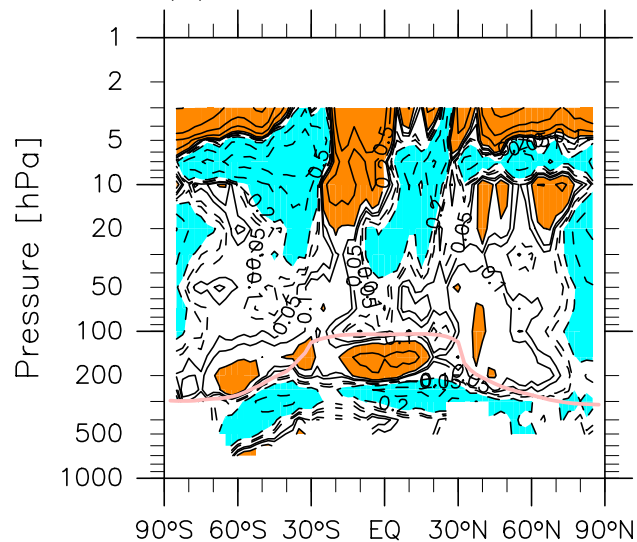

(b) JRA-55 - REM

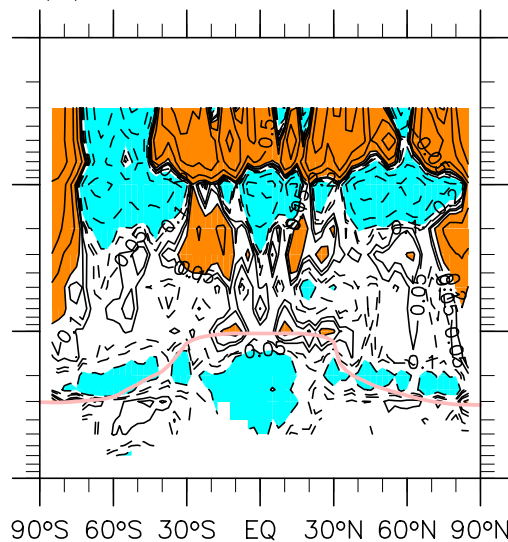

(c) ERA-Int - REM

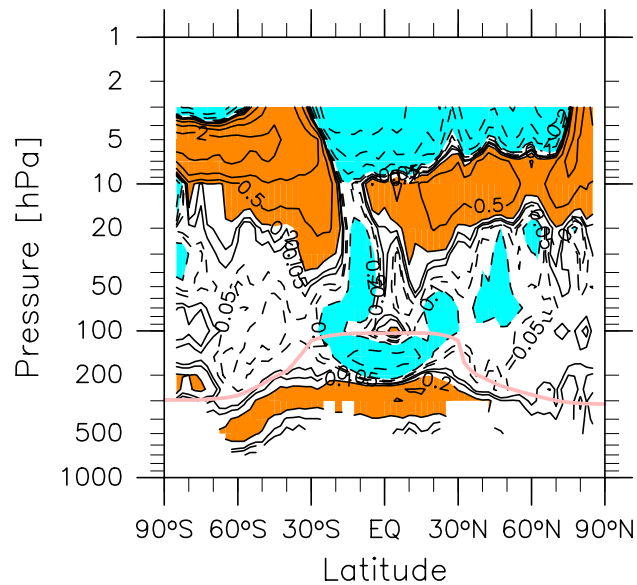

(d) CFSR - REM

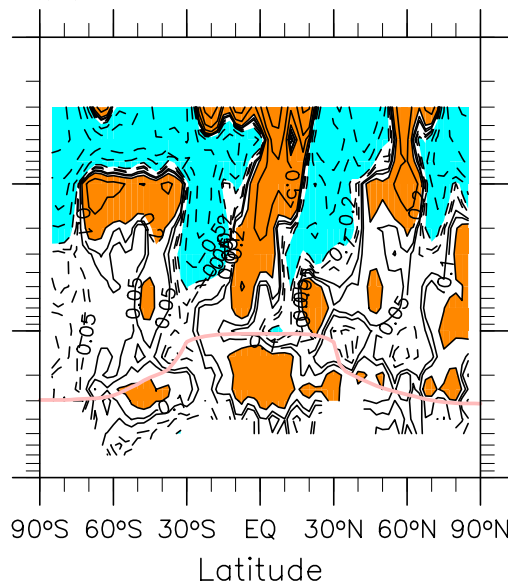

MAM (81-10)

(e) SD

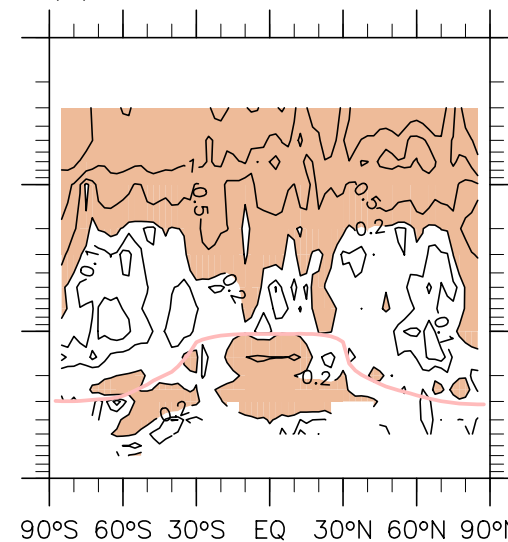

(f) ( SD / | REM | ) x 100%

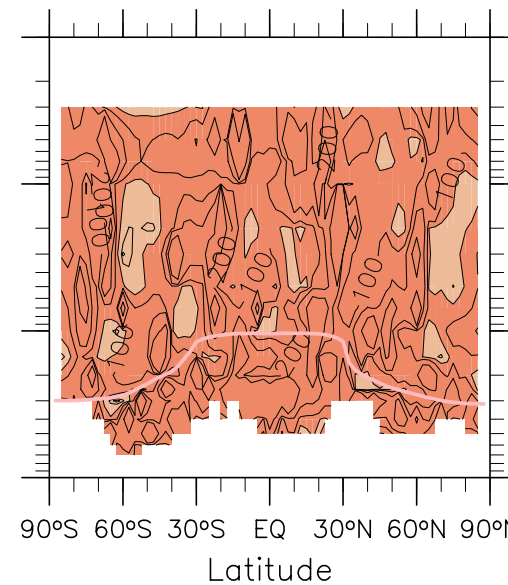

Supplement: Supplementary file 30 [file acp-24-7873-2024-supplement.zip]
