# Supplementary material for: Climatology of the terms and variables of transformed Eulerian-mean (TEM) equations from multiple reanalyses: MERRA-2, JRA-55, ERA-Interim, and CFSR
Source: Copernicus journal article supplement (doi:10.5194/acp-24-7873-2024), 2024-07-10

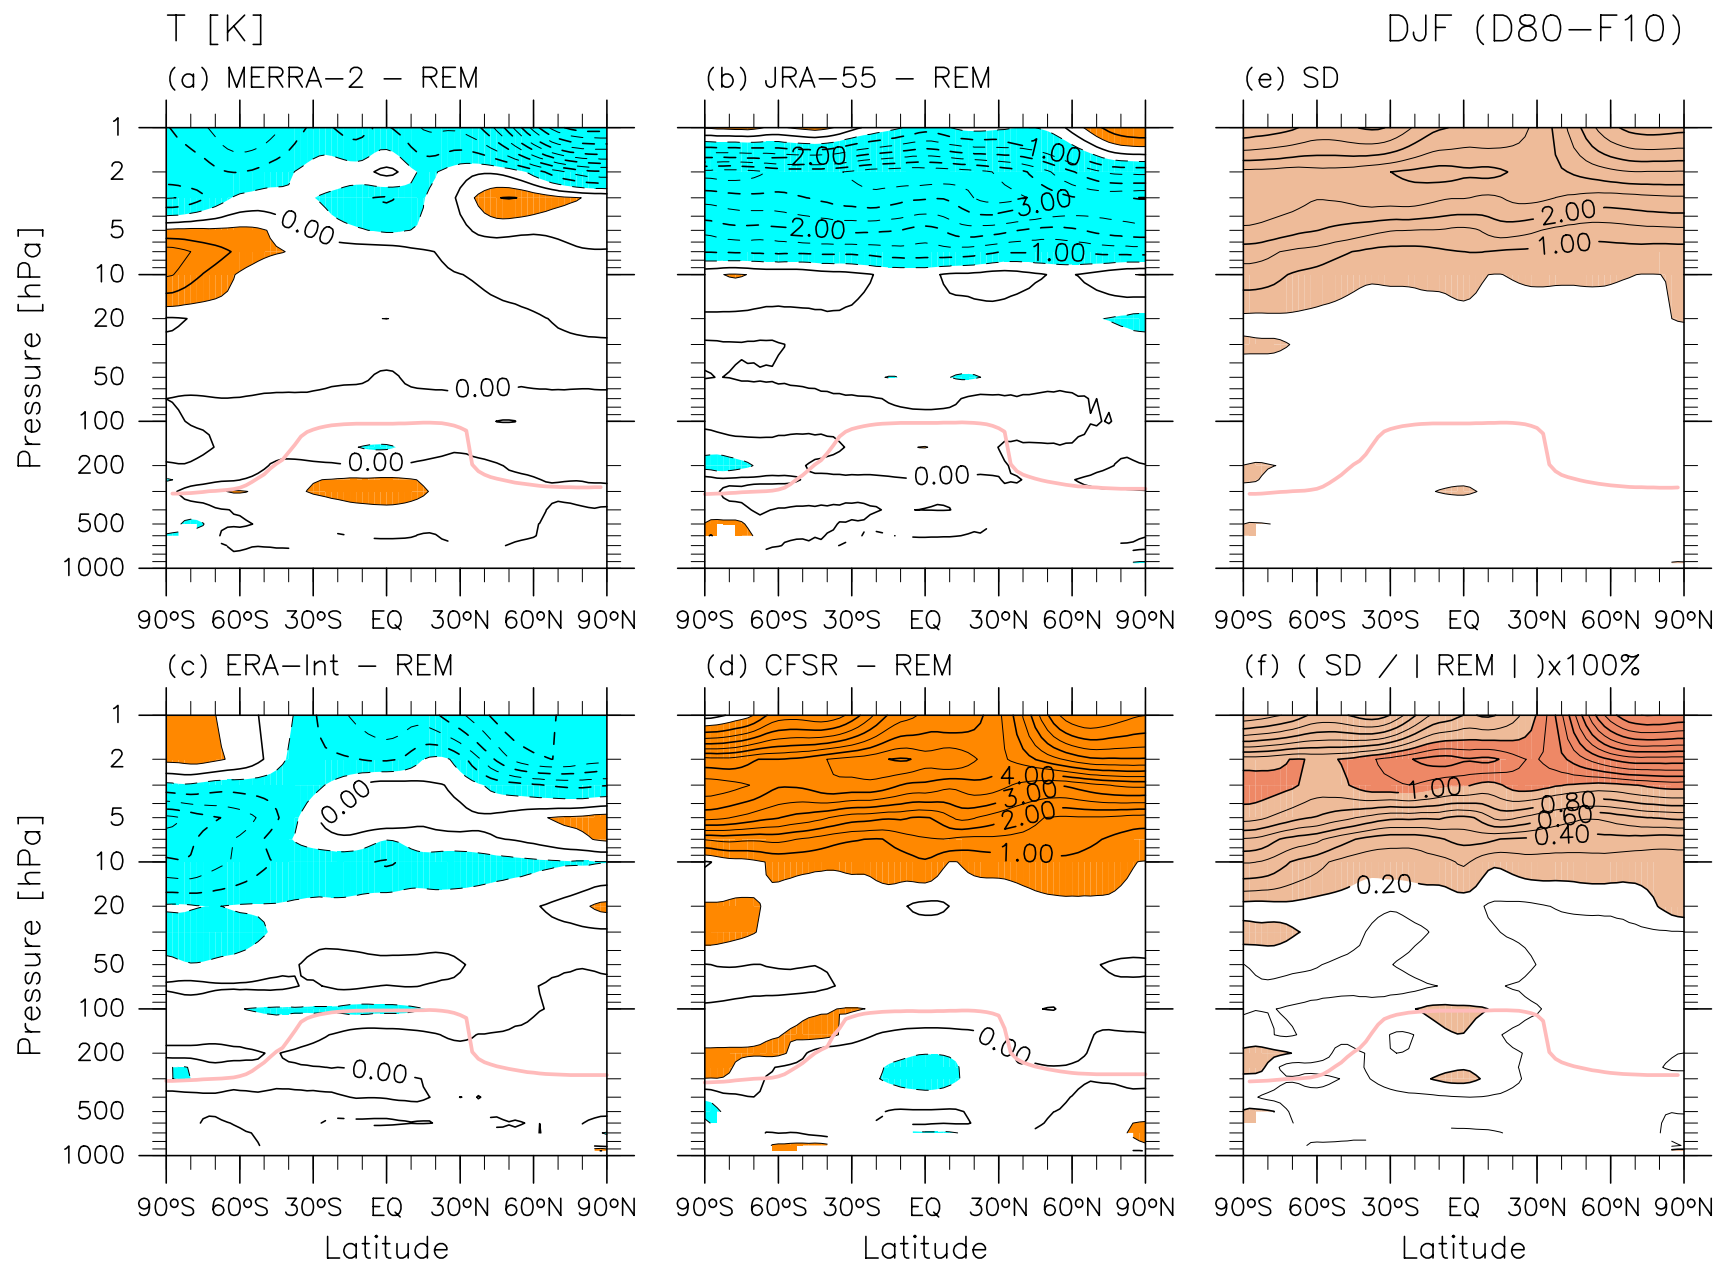

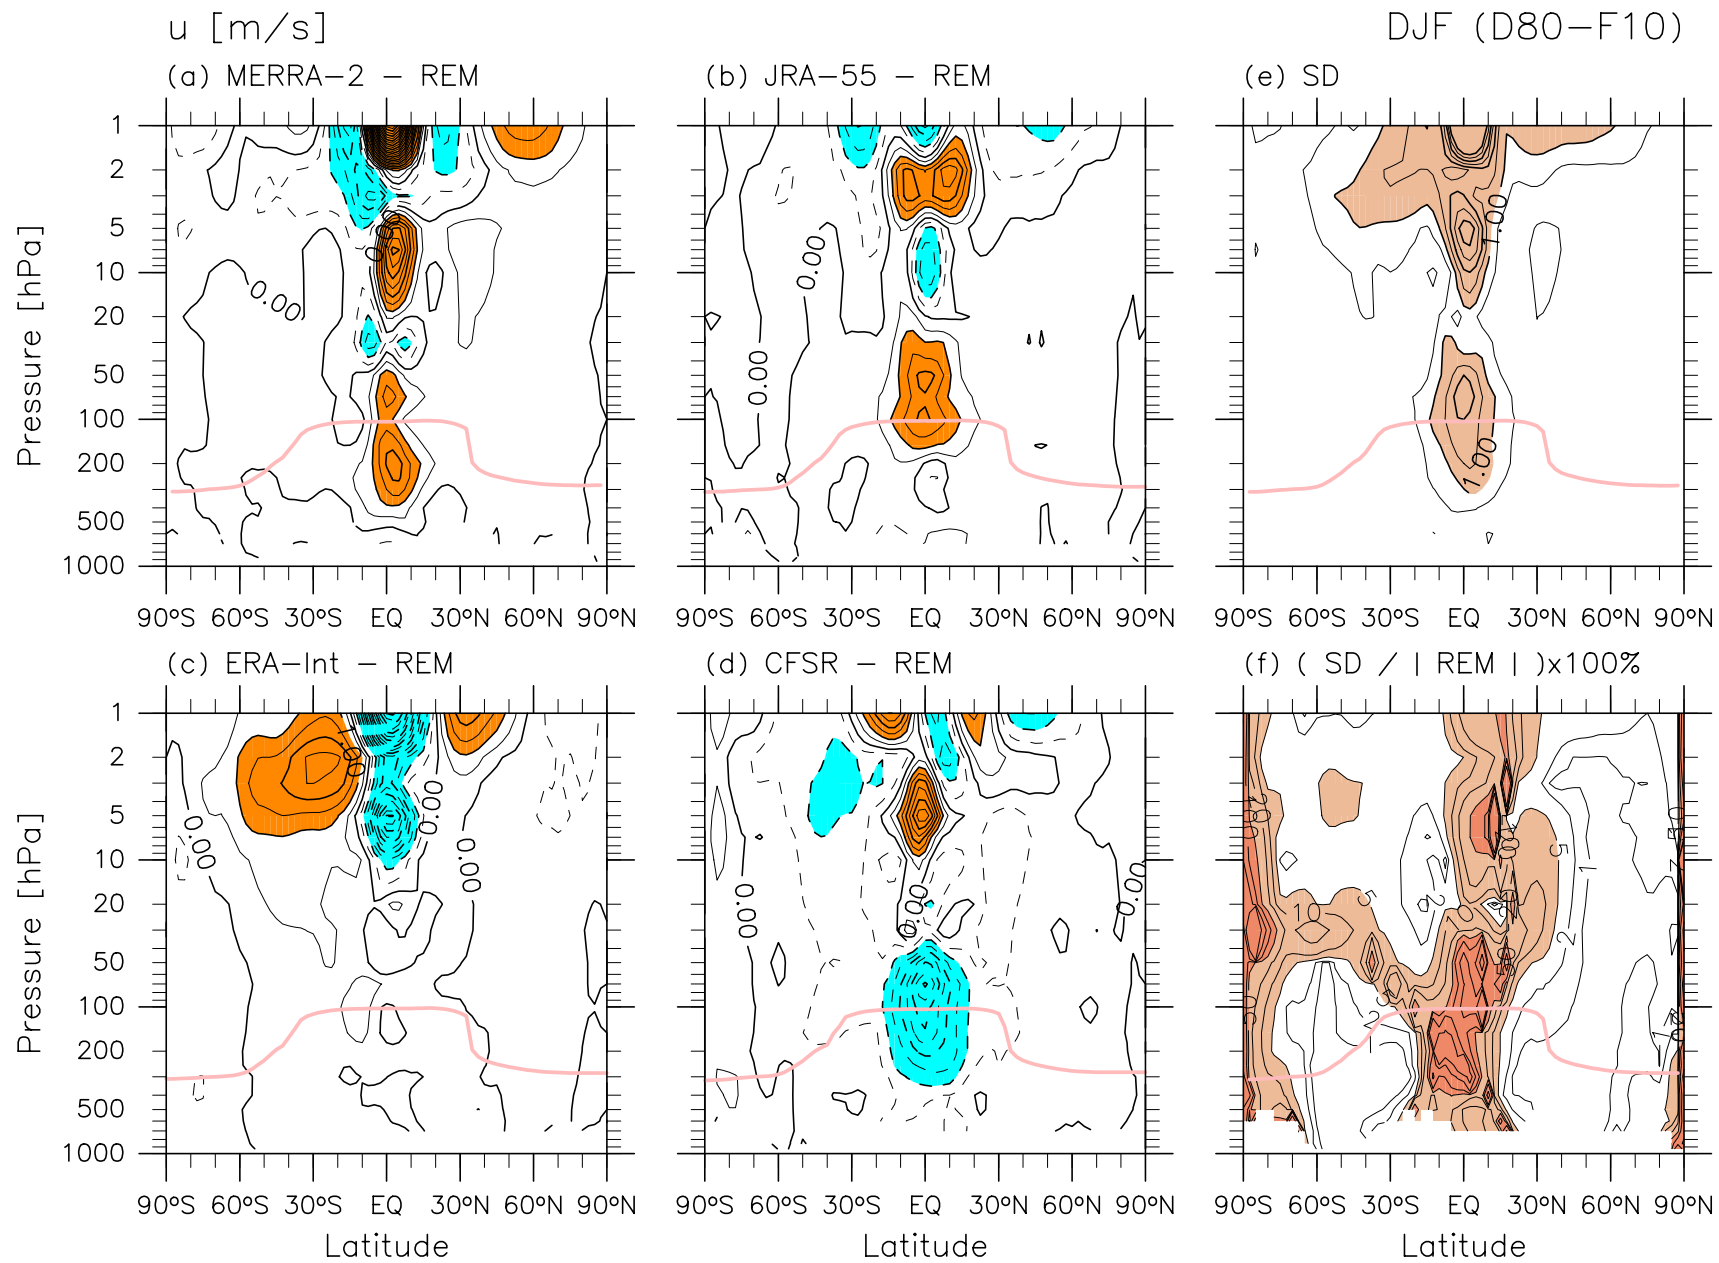

$v_{res}$  [m/s]

(a) MERRA-2 – REM

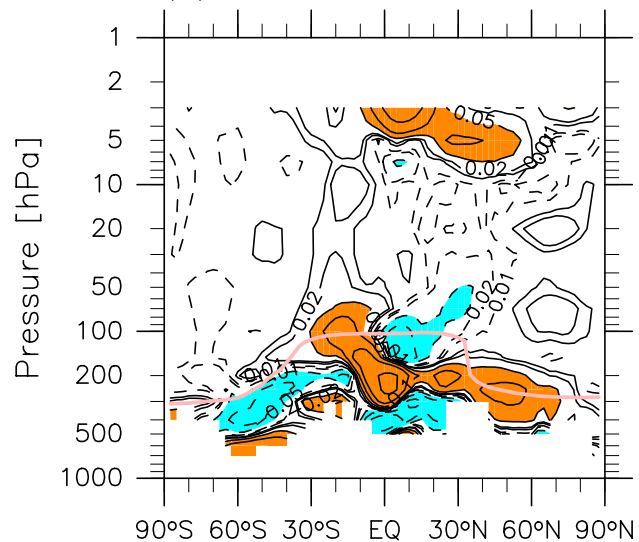

(b) JRA-55 – REM

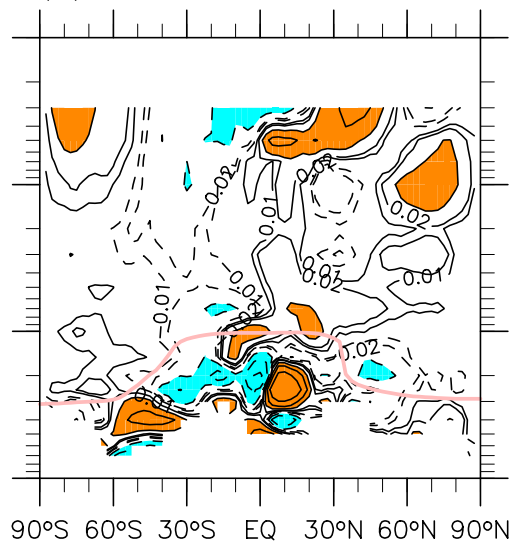

DJF (D80–F10)

(e) SD

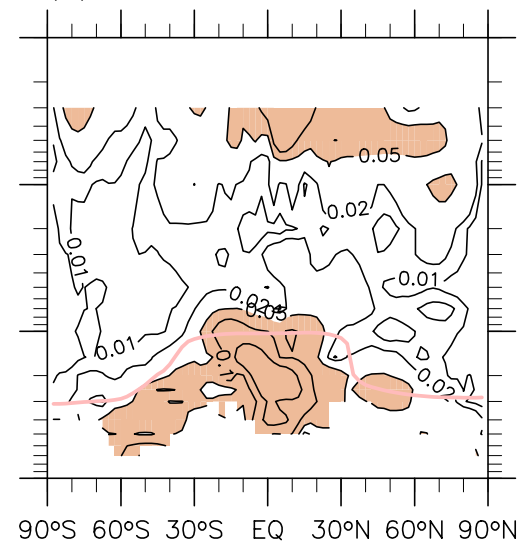

(c) ERA-Int – REM

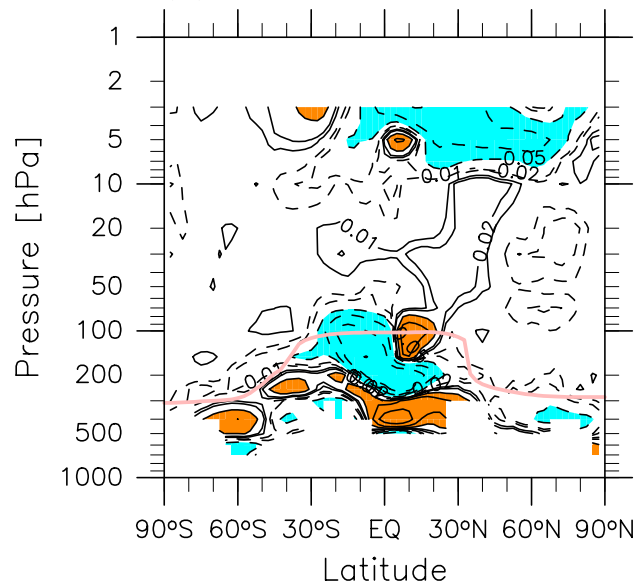

(d) CFSR – REM

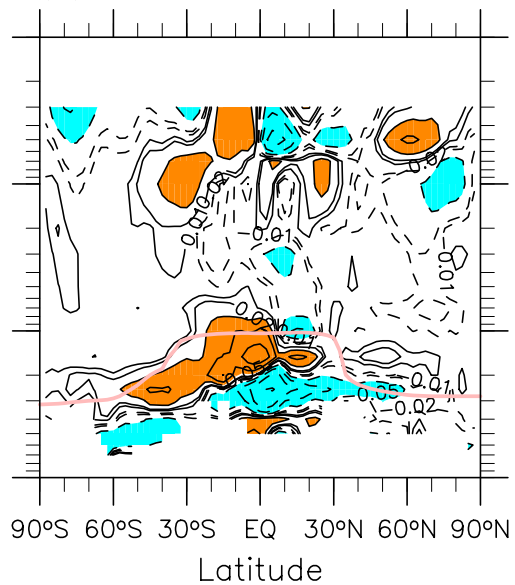

(f)  $(SD / |REM|) \times 100\%$

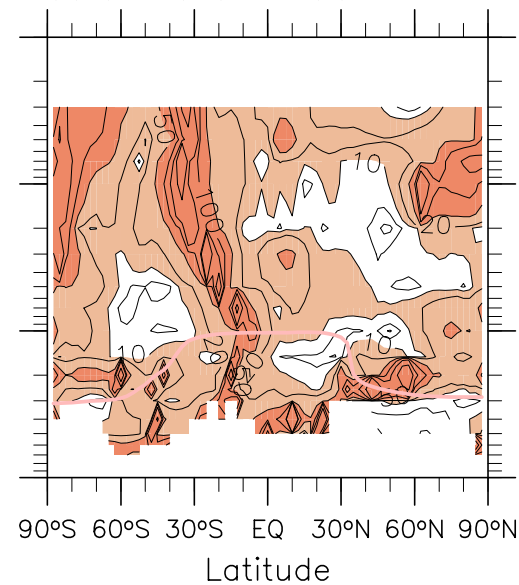

$\omega_{\text{res}}$  [mPa/s]

(a) MERRA-2 - REM

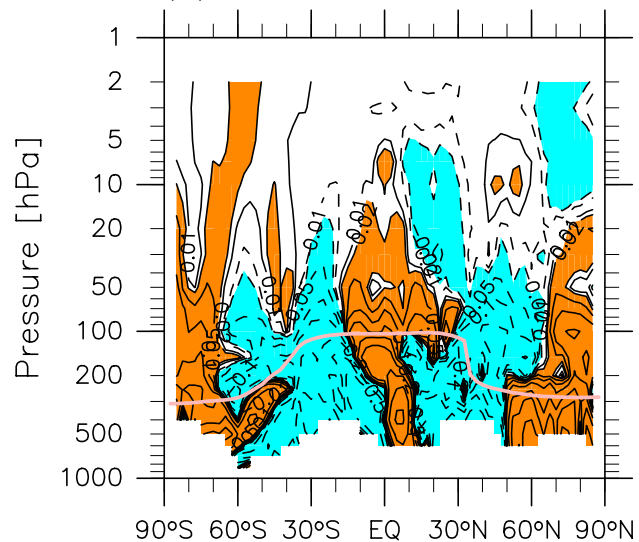

(b) JRA-55 - REM

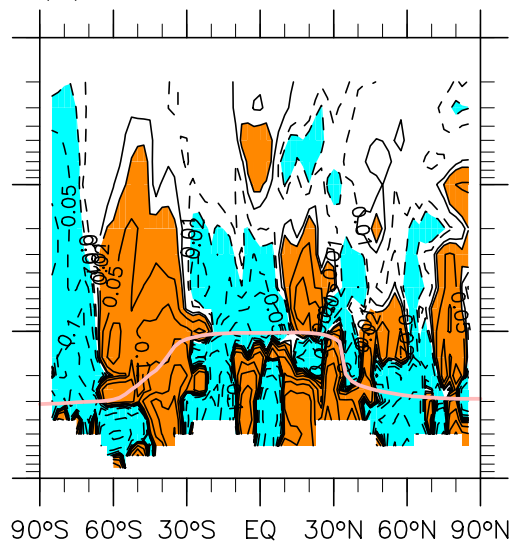

DJF (D80-F10)

(e) SD

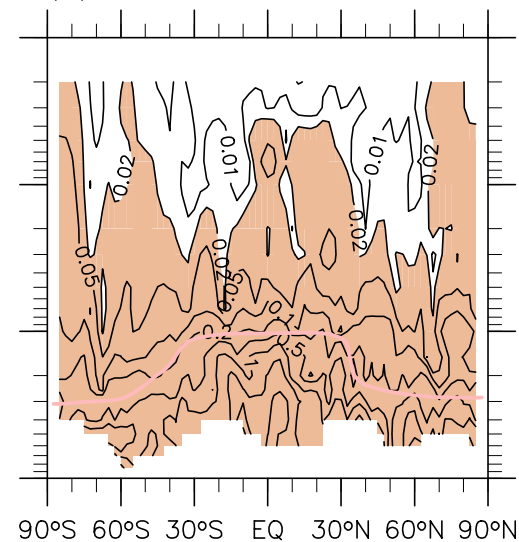

(c) ERA-Int - REM

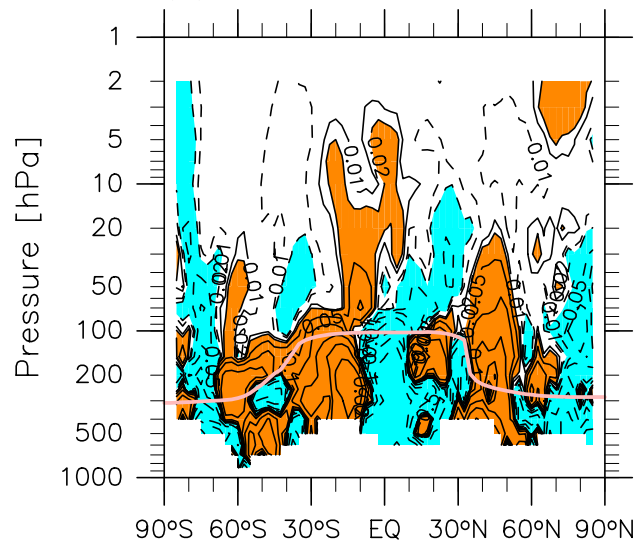

(d) CFSR - REM

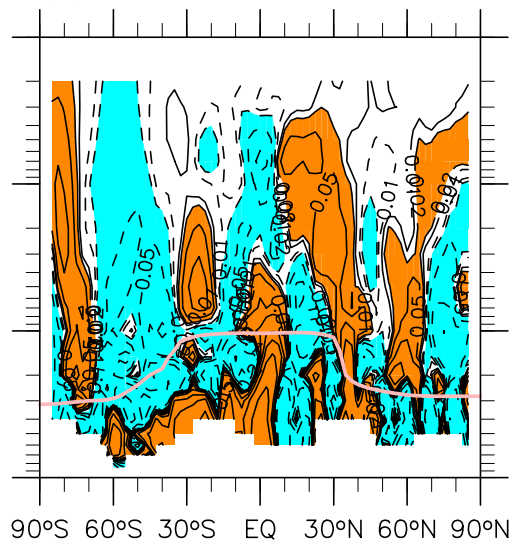

(f)  $(\text{SD} / |\text{REM}|) \times 100\%$

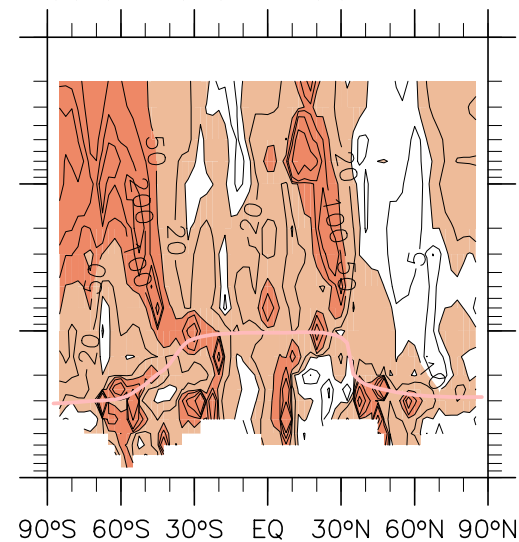

Latitude

Latitude

Latitude

$w_{res}$  [mm/s]

(a) MERRA-2 – REM

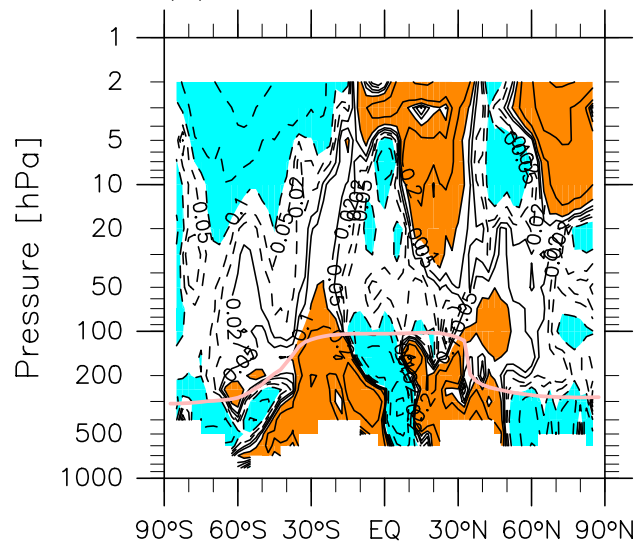

(b) JRA-55 – REM

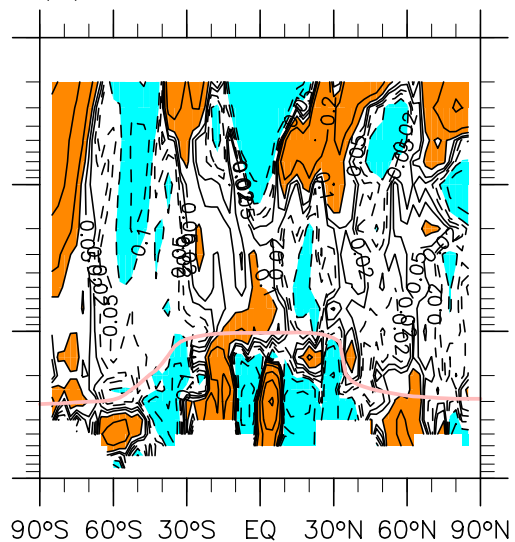

DJF (D80–F10)

(e) SD

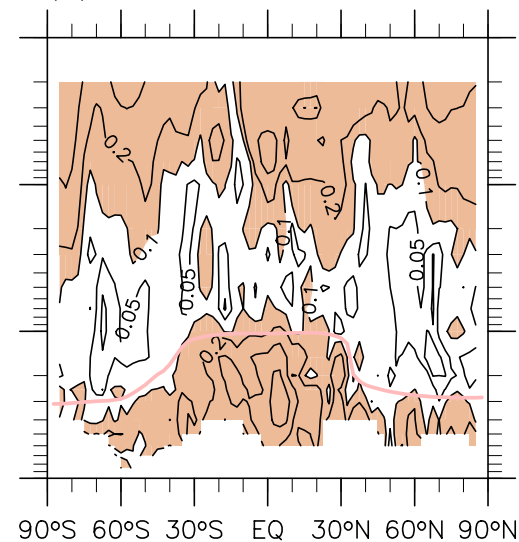

(c) ERA-Int – REM

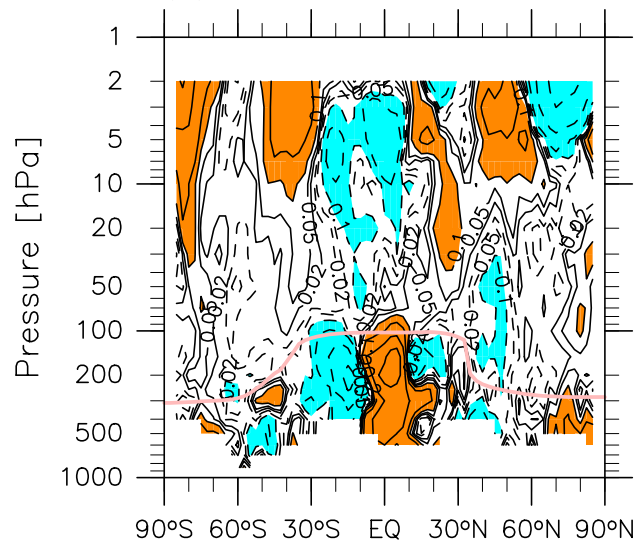

(d) CFSR – REM

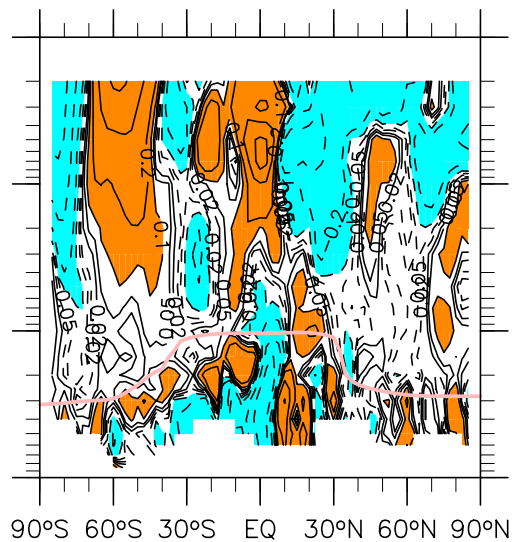

(f)  $(SD / |REM|) \times 100\%$



Latitude

Latitude

Latitude



$\Psi_{\text{vres}}$  [kg/m/s]

(a) MERRA-2 - REM

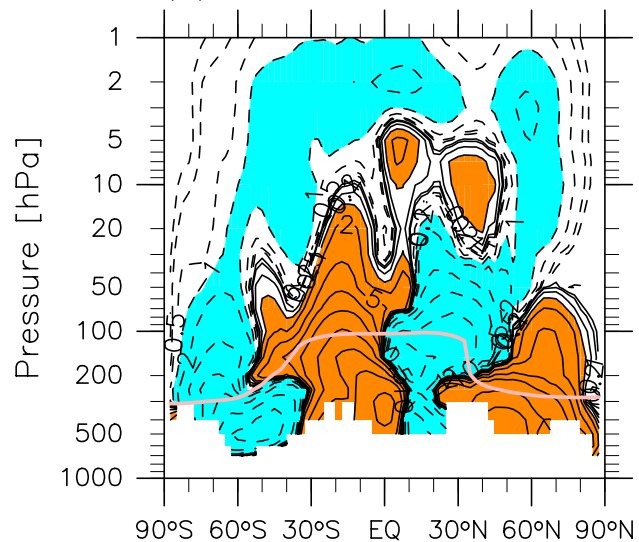

(b) JRA-55 - REM

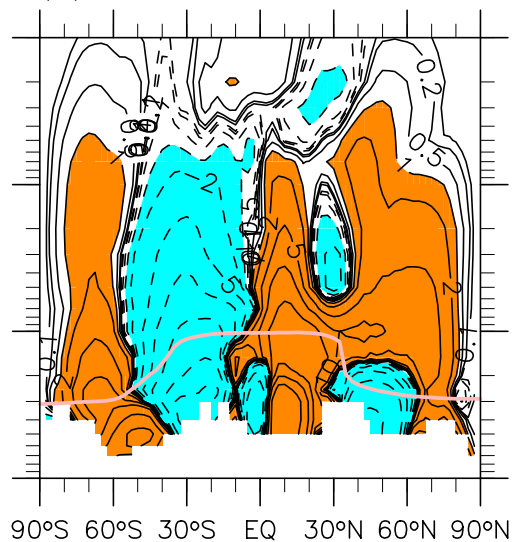

DJF (D80-F10)

(e) SD

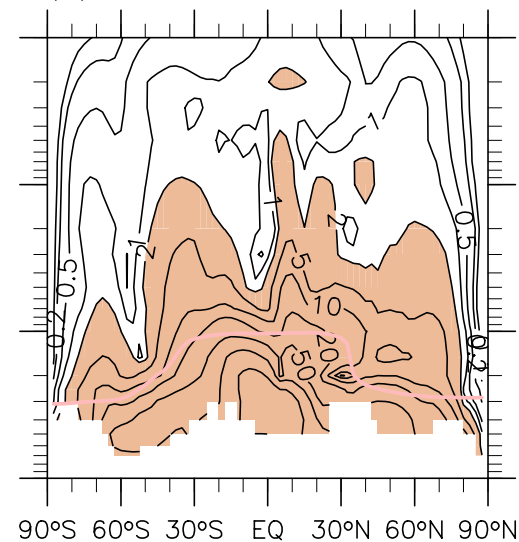

(c) ERA-Int - REM

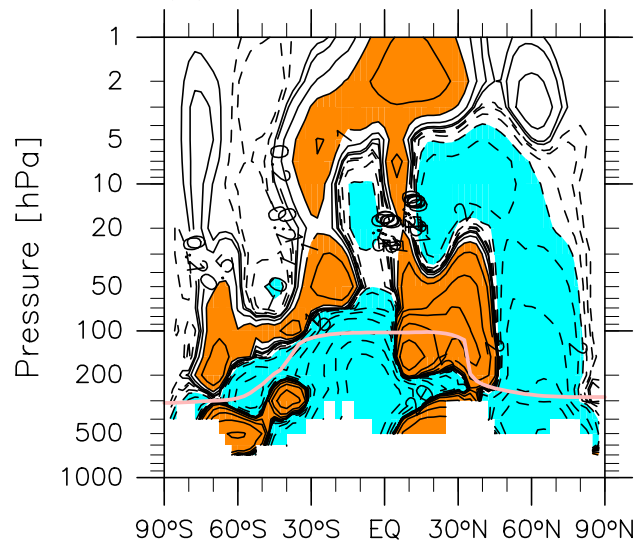

(d) CFSR - REM

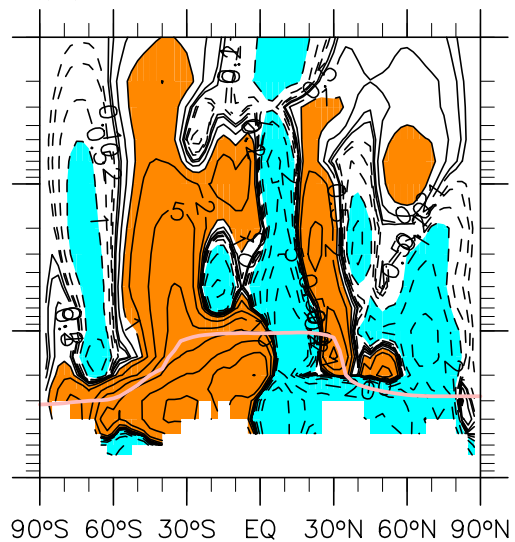

(f)  $(\text{SD} / |\text{REM}|) \times 100\%$

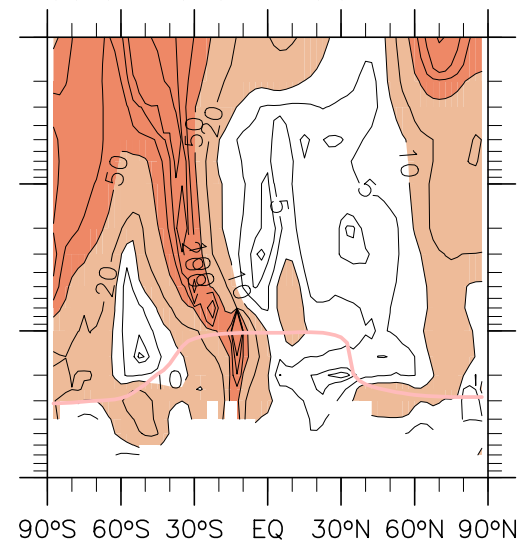

Latitude

Latitude

Latitude

$\psi_{\text{wres}}$  [kg/m/s]

(a) MERRA-2 - REM

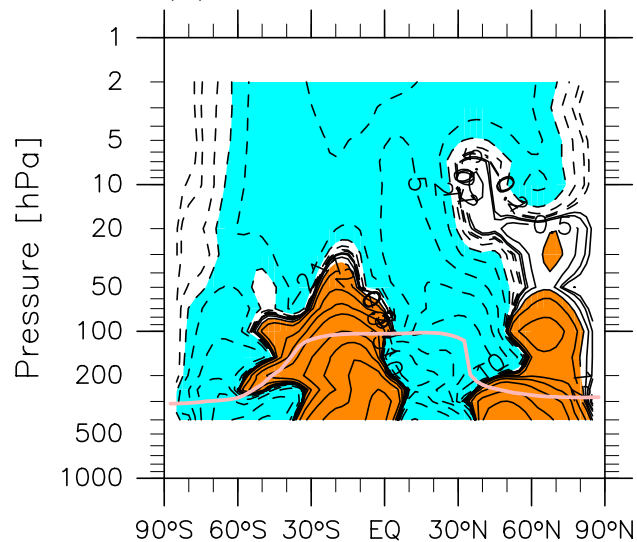

(b) JRA-55 - REM

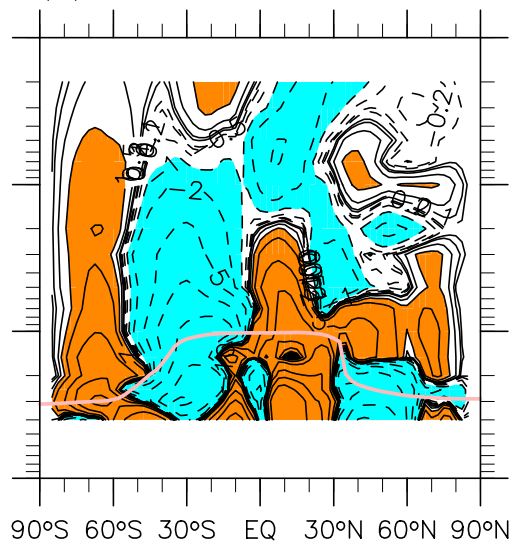

DJF (D80-F10)

(e) SD

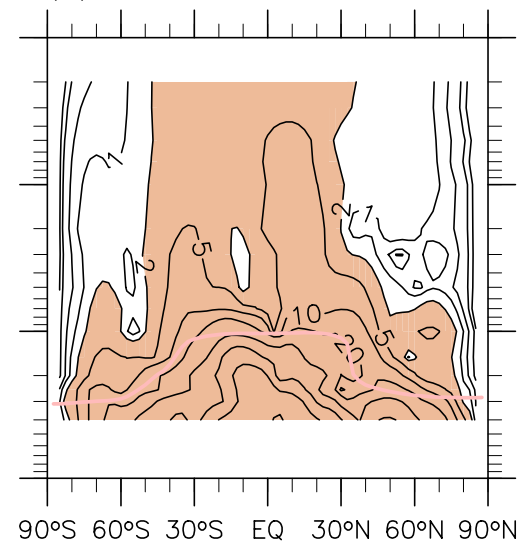

(c) ERA-Int - REM

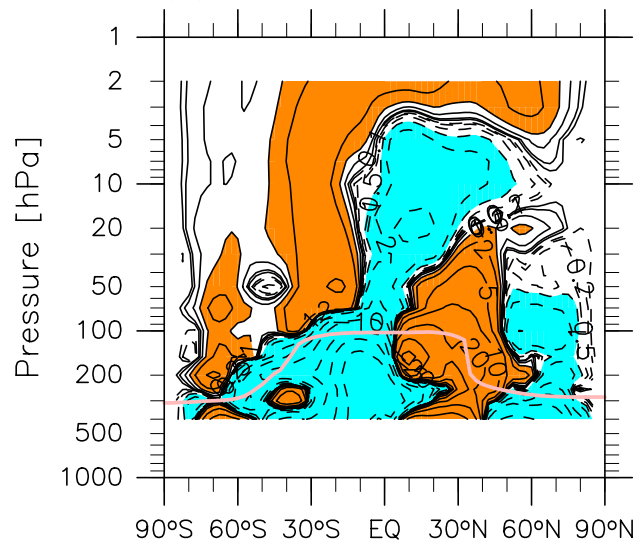

(d) CFSR - REM

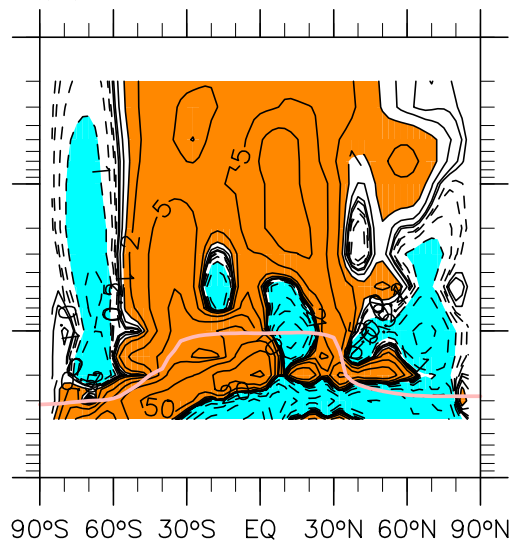

(f) ( SD / | REM | ) x 100%

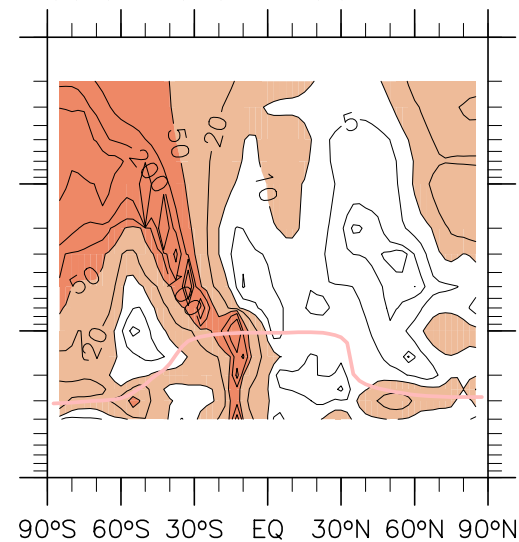

Latitude

Latitude

Latitude

Q\_longwave [K/d]

(a) MERRA-2 - REM

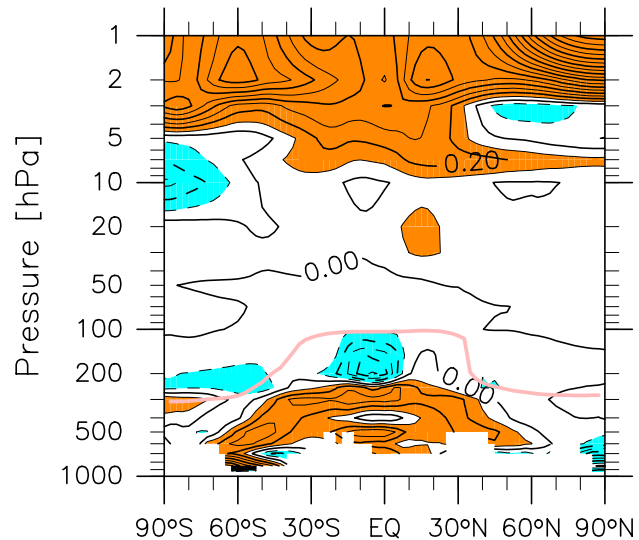

(b) JRA-55 - REM

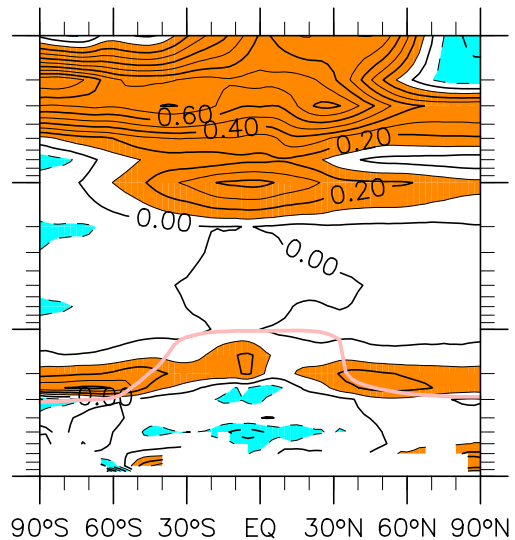

DJF (D80-F10)

(e) SD

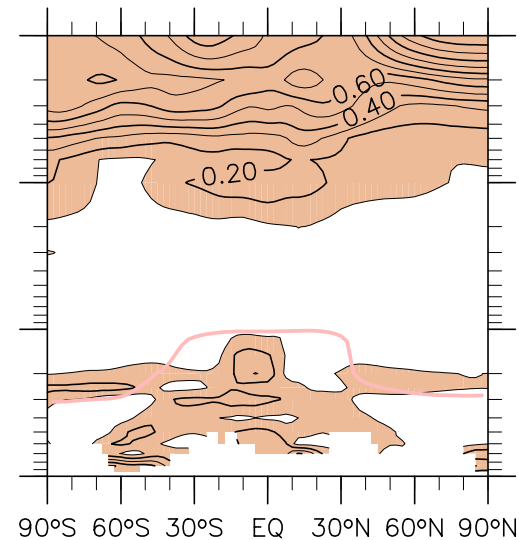

(c) ERA-Int - REM

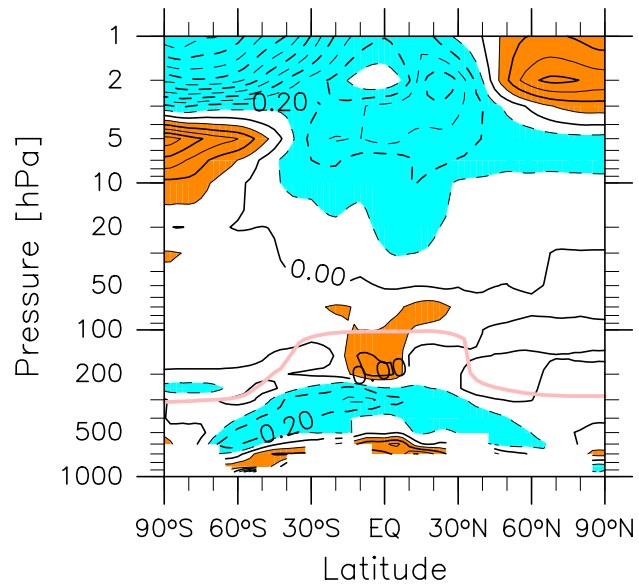

(d) CFSR - REM

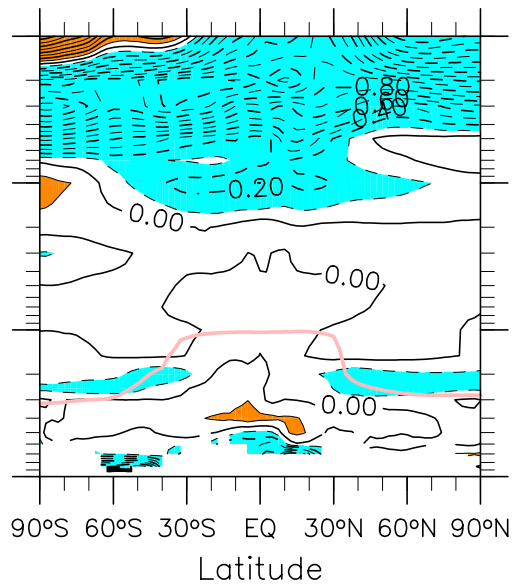

(f) ( SD / | REM | ) x 100%

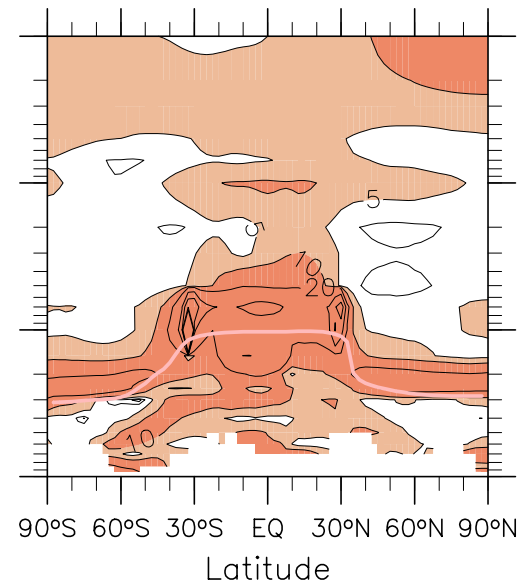



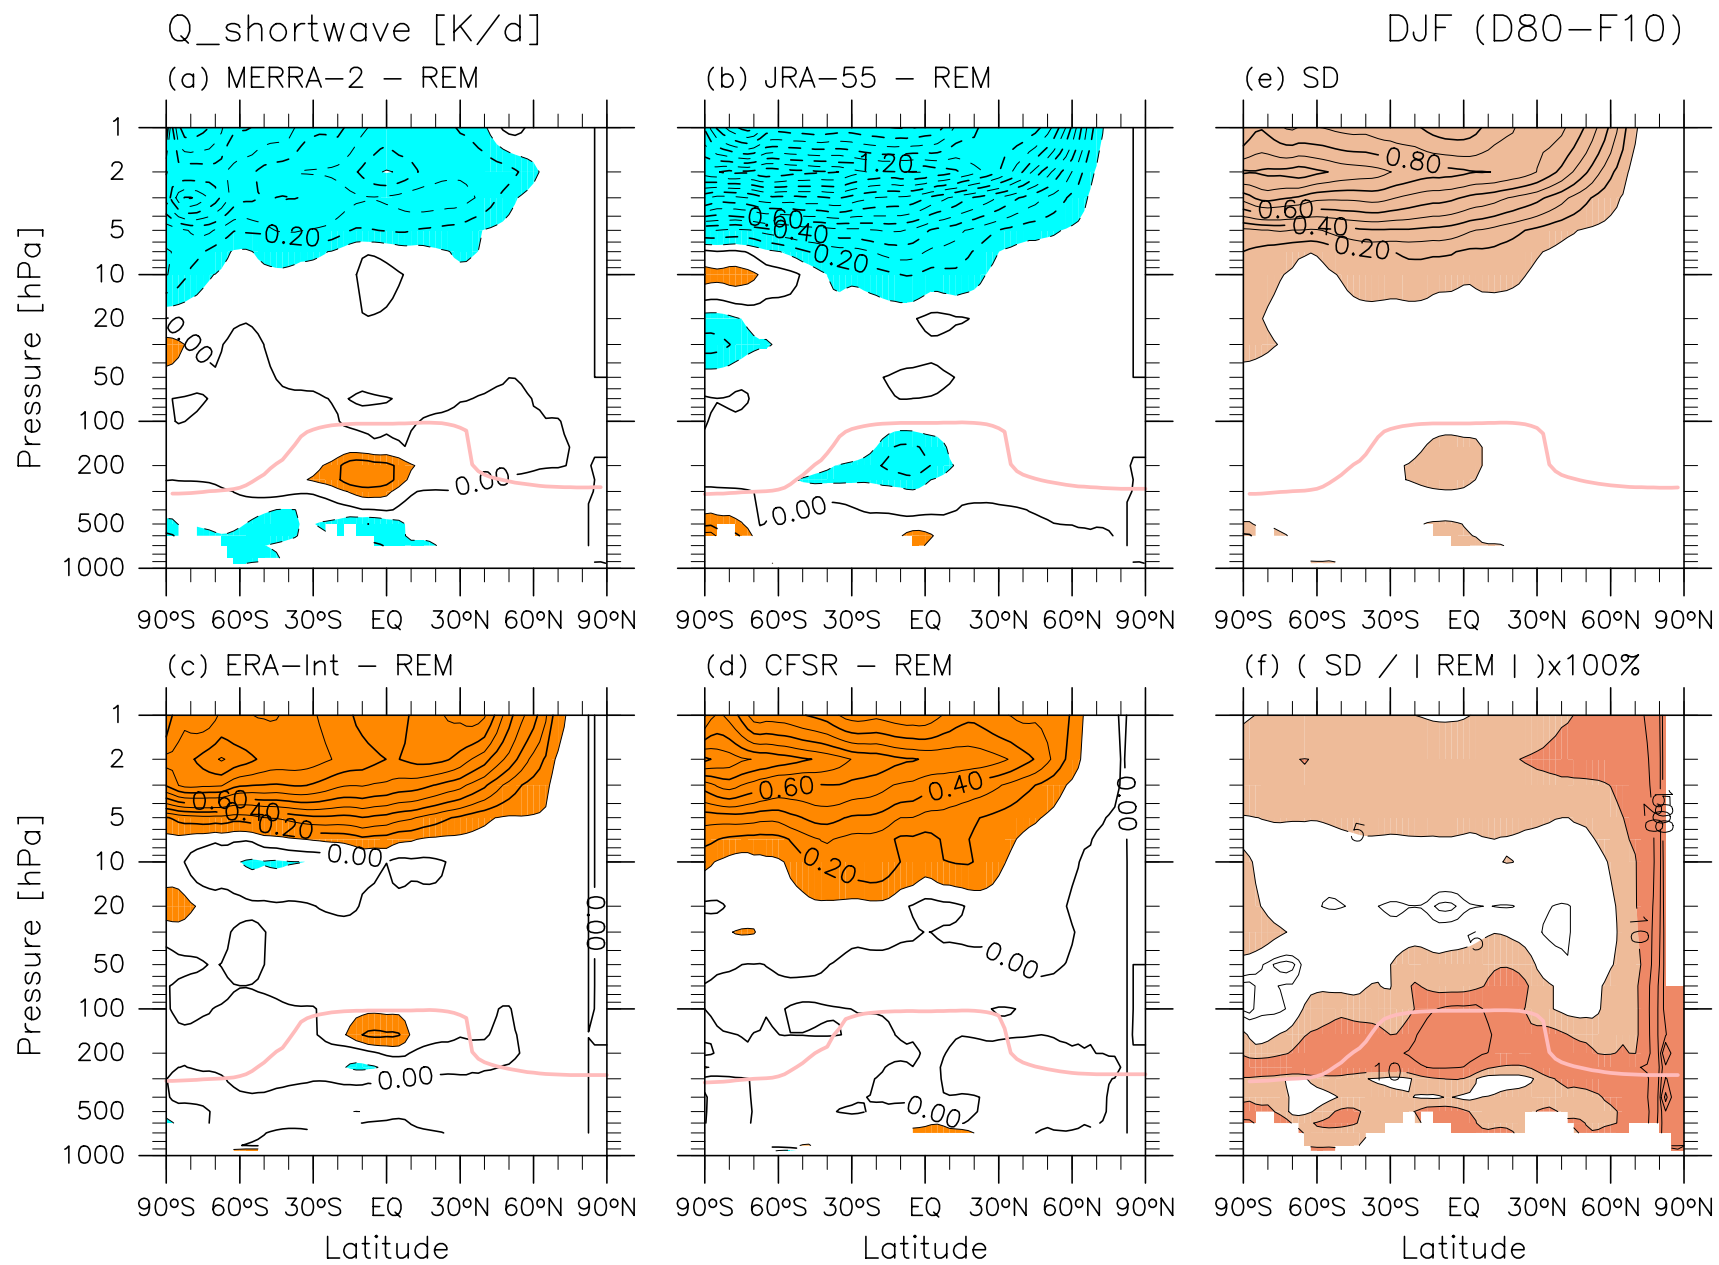

$Q_{\text{total}} - Q_{\text{rad}}$  [K/d]

(a) MERRA-2 - REM

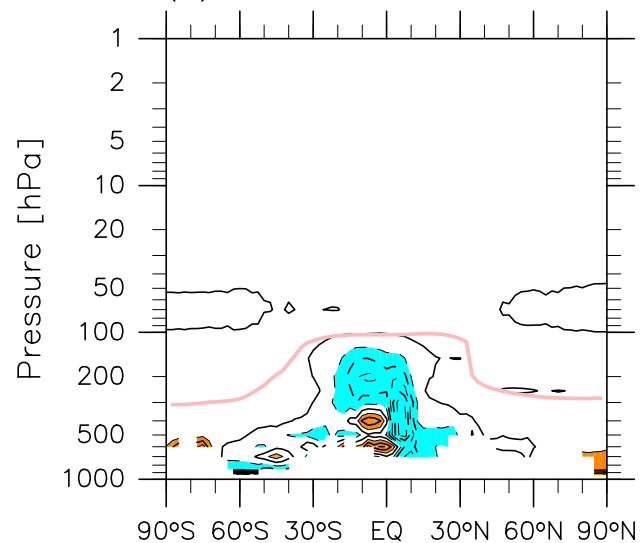

(b) JRA-55 - REM

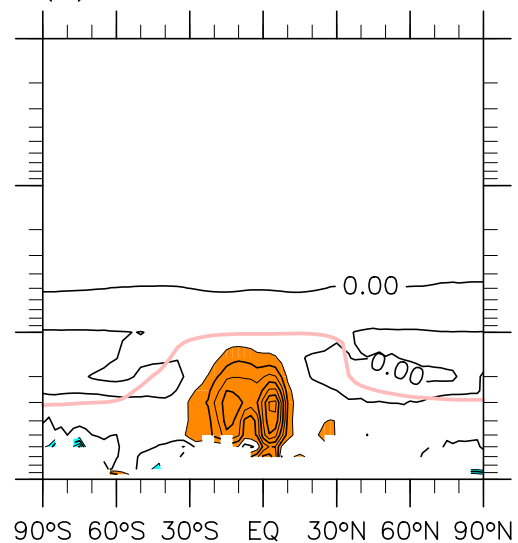

DJF (D80-F10)

(e) SD

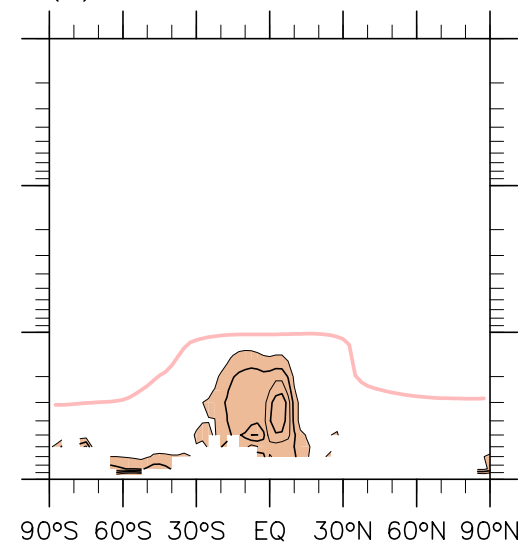

(c) ERA-Int - REM

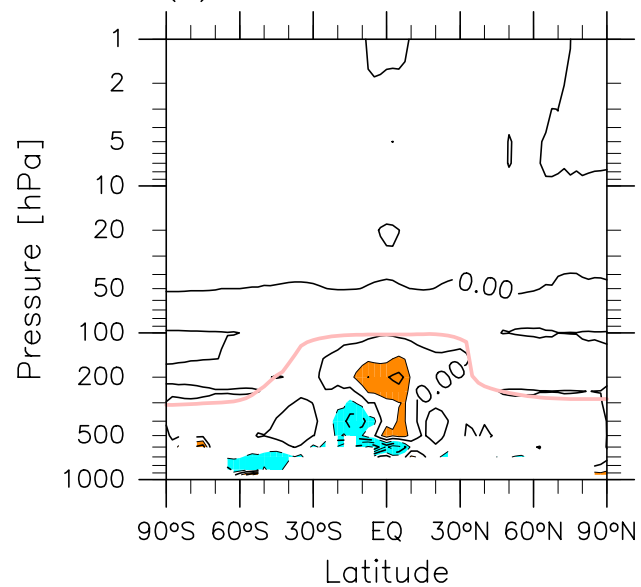

(d) CFSR - REM

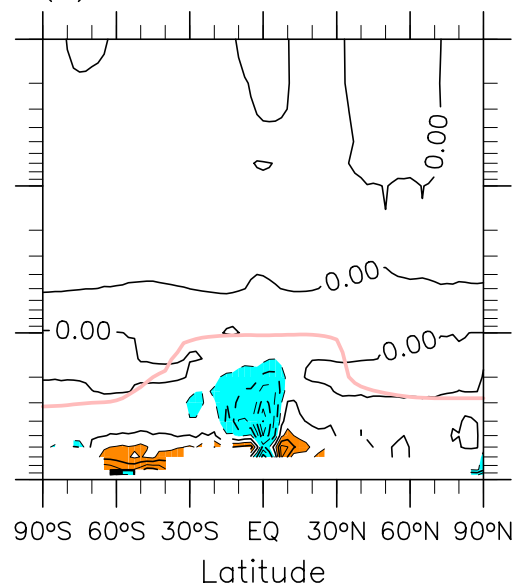

(f)  $(SD / |REM|) \times 100\%$

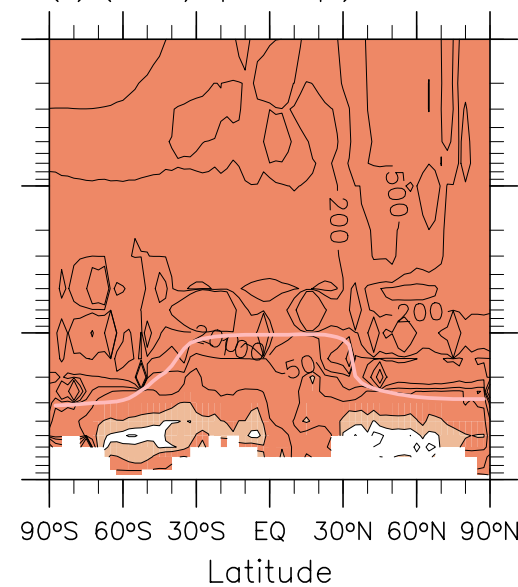

Ozone [ppmv]

(a) MERRA-2 - REM

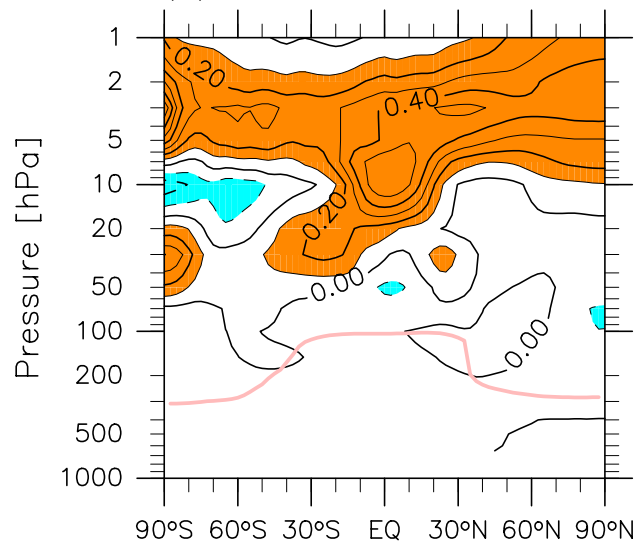

(b) JRA-55 - REM

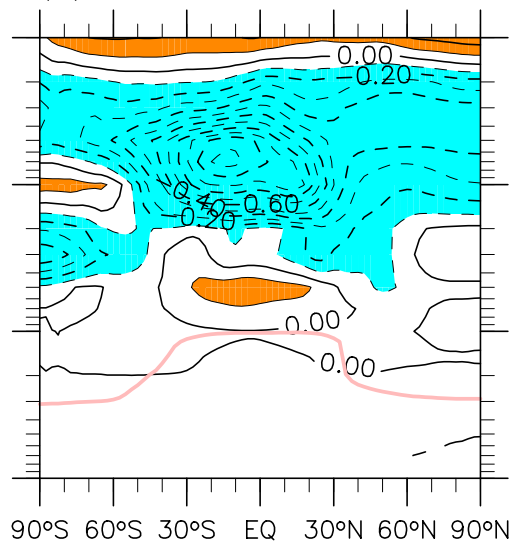

DJF (D80-F10)

(e) SD

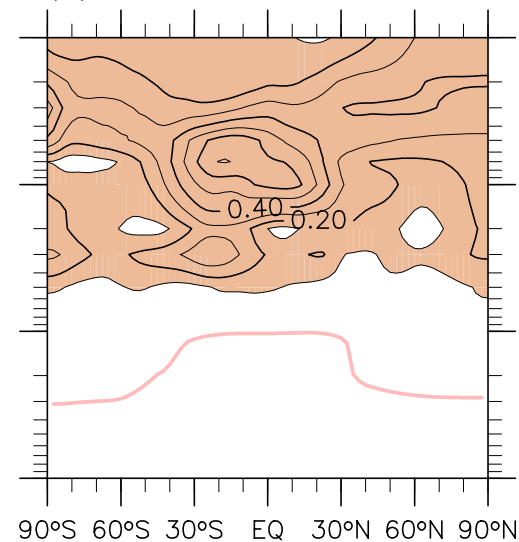

(c) ERA-Int - REM

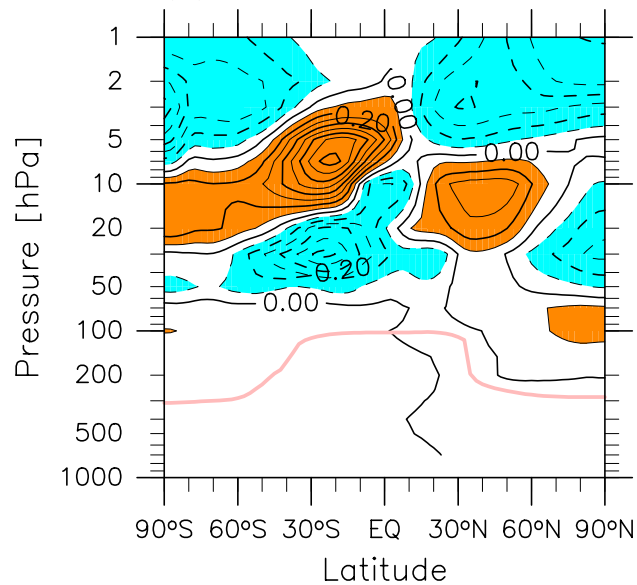

(d) CFSR - REM

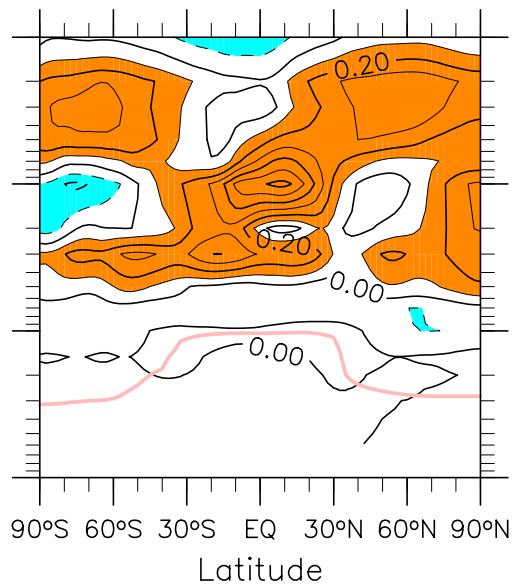

(f) ( SD / | REM | ) x 100%

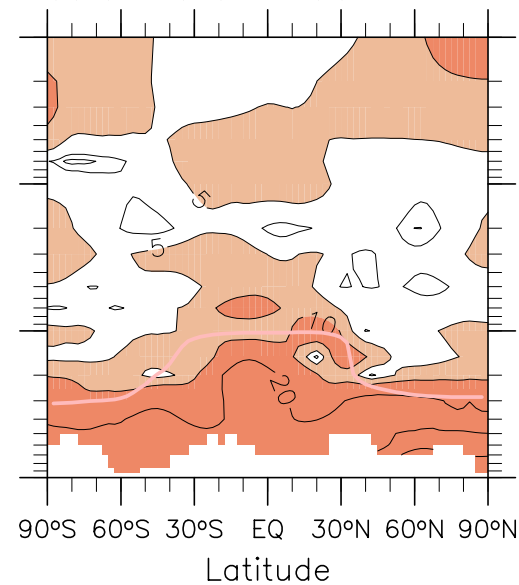

+f<sub>v</sub>\*

DJF (D80–F10)

(a) MERRA-2 – REM

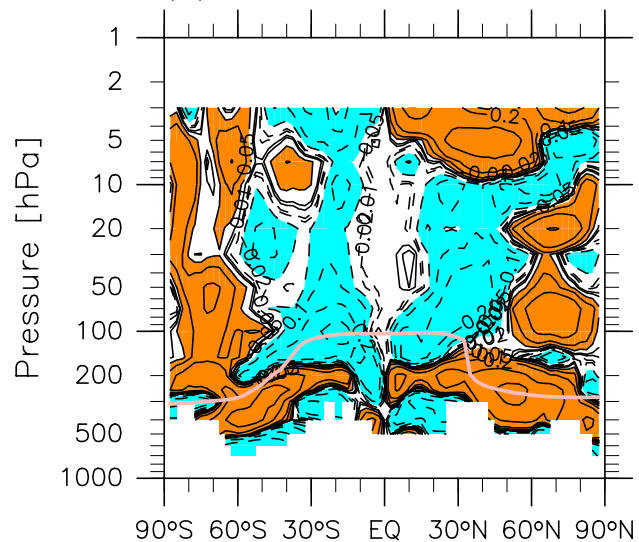

(b) JRA-55 – REM

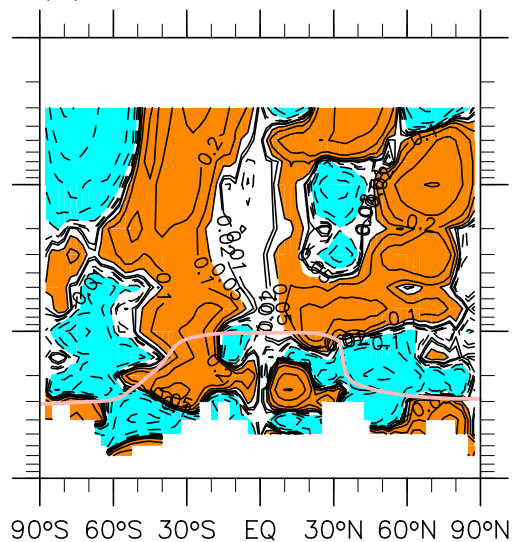

(e) SD

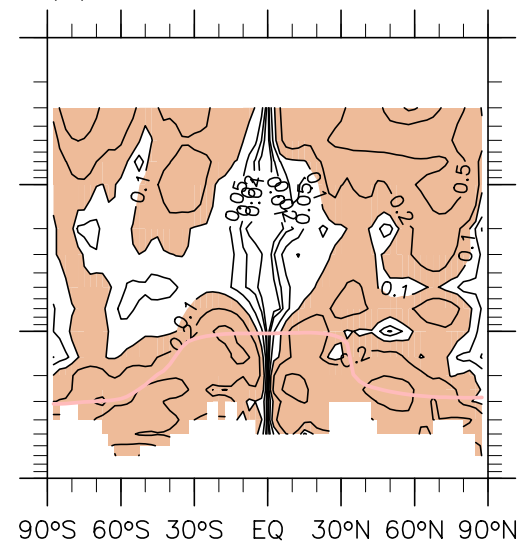

(c) ERA-Int – REM

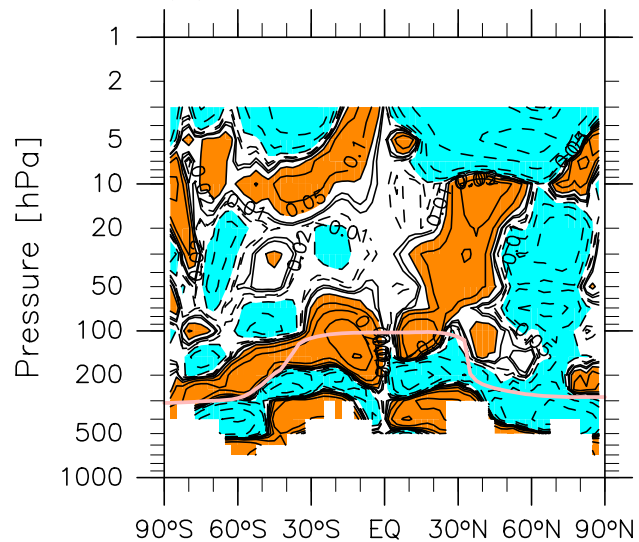

(d) CFSR – REM

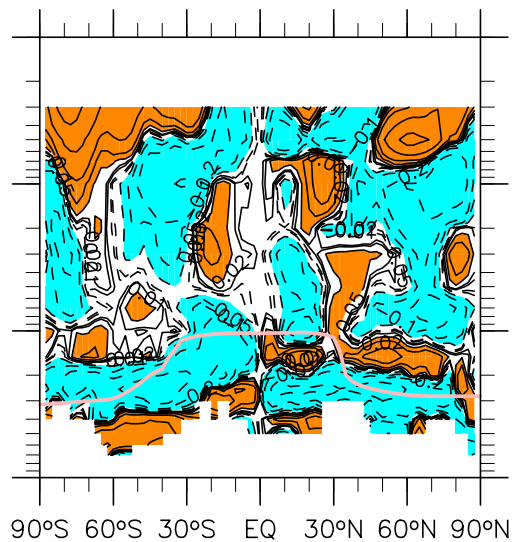

(f) ( SD / | REM | )x100%

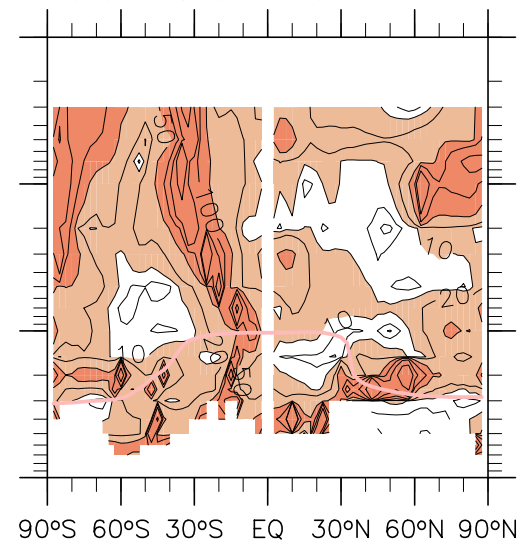

Latitude

Latitude

Latitude

$$+fv^* - v^* \frac{\partial u}{\partial y} - \omega^* \frac{\partial u}{\partial p}$$

DJF (D80–F10)

(a) MERRA-2 – REM

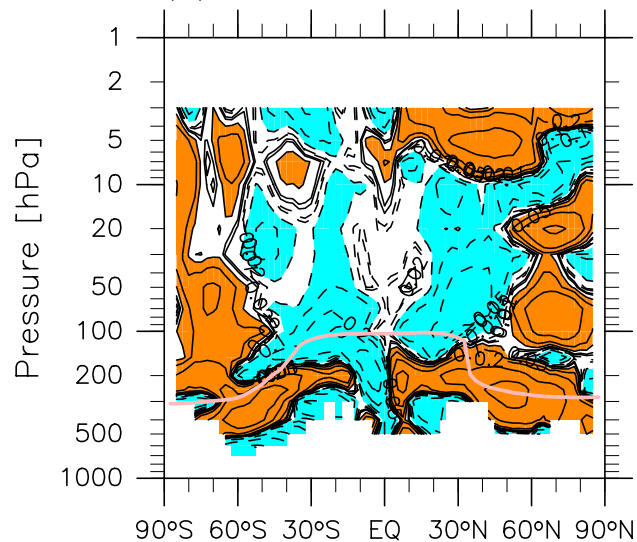

(b) JRA-55 – REM

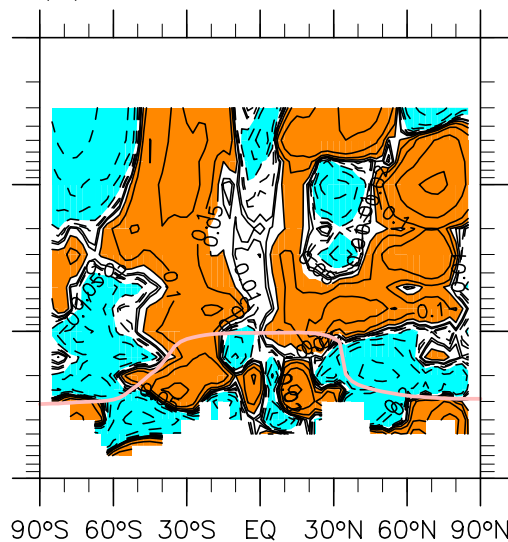

(e) SD

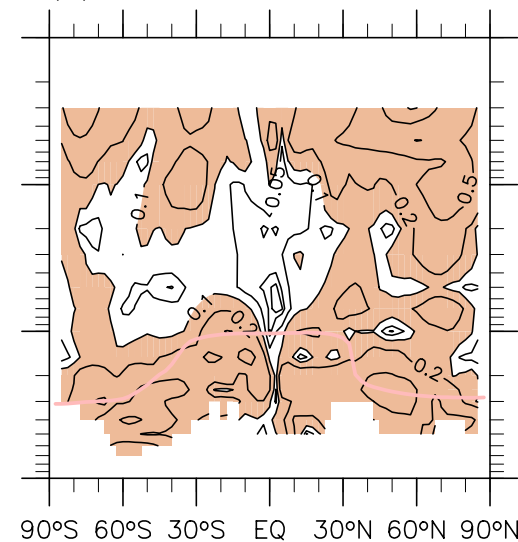

(c) ERA-Int – REM

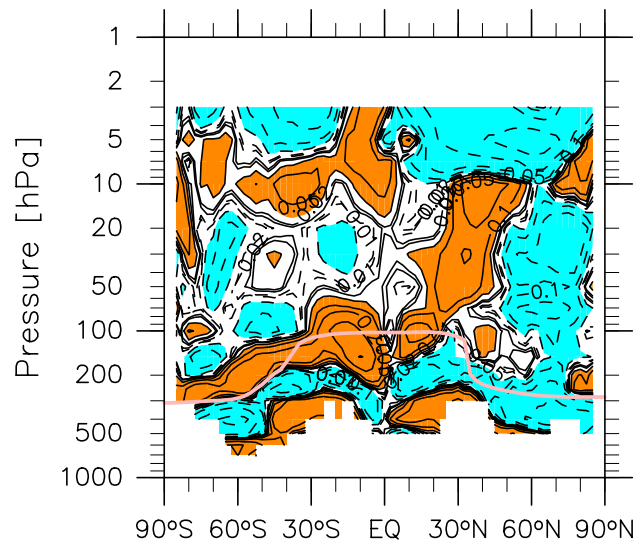

(d) CFSR – REM

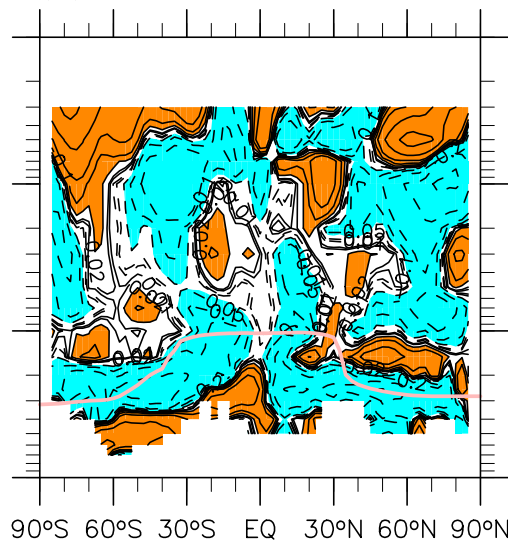

(f) ( SD / | REM | ) x 100%

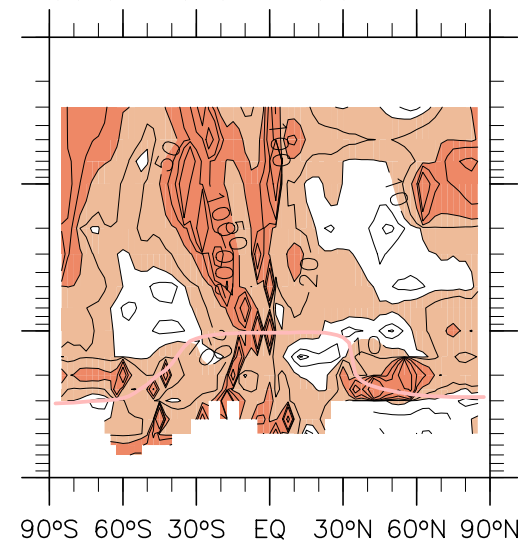

Latitude

Latitude

Latitude



EPFD

(a) MERRA-2 - REM

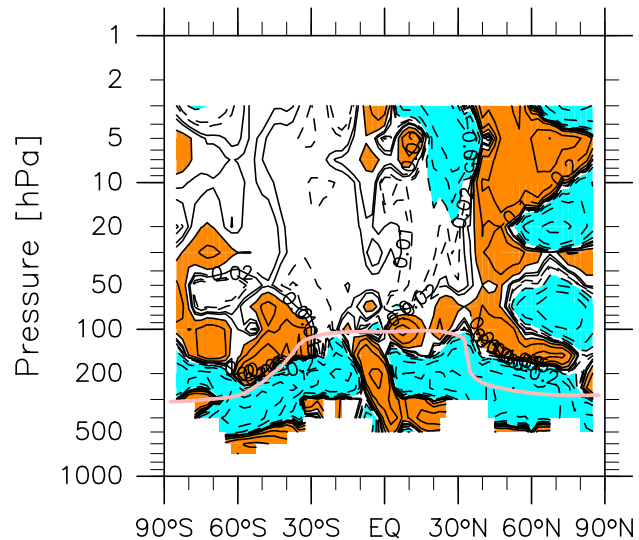

(b) JRA-55 - REM

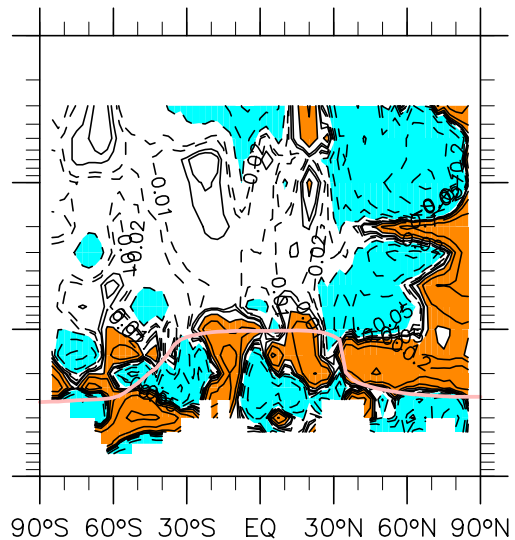

(c) ERA-Int - REM

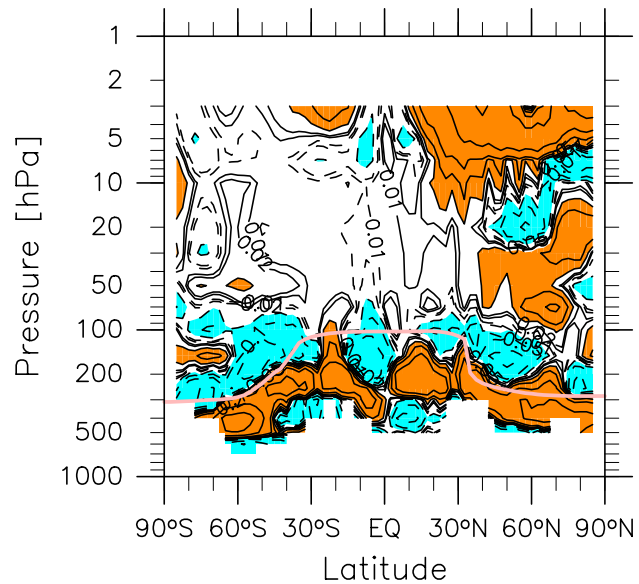

(d) CFSR - REM

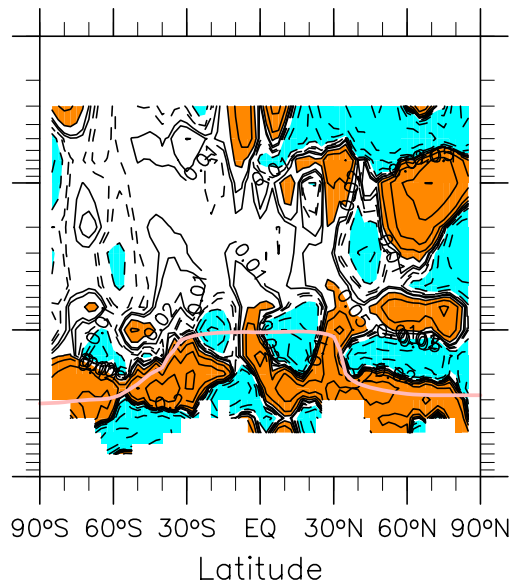

DJF (D80-F10)

(e) SD

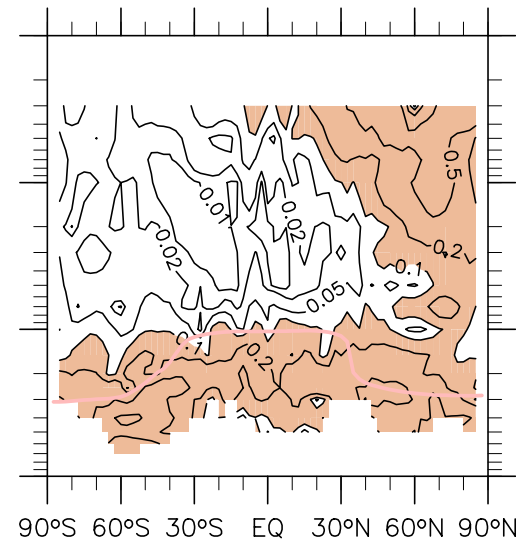

(f)  $(SD / |REM|) \times 100\%$

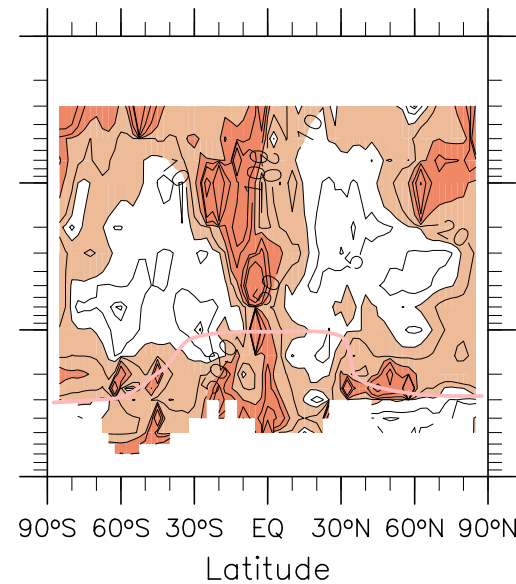

Residual\_u

(a) MERRA-2 - REM

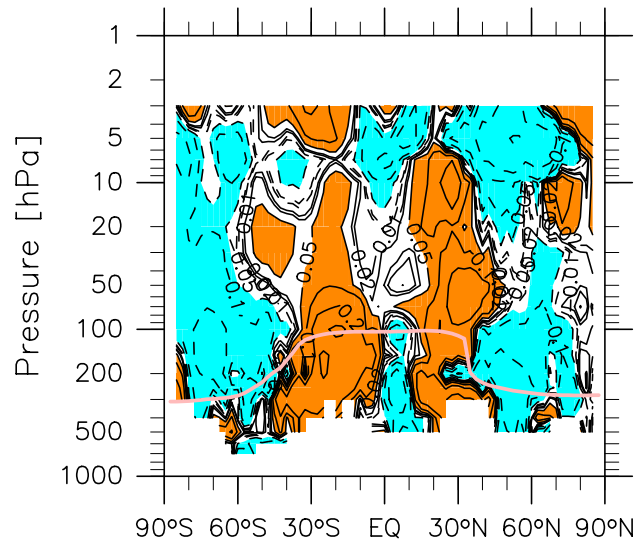

(b) JRA-55 - REM

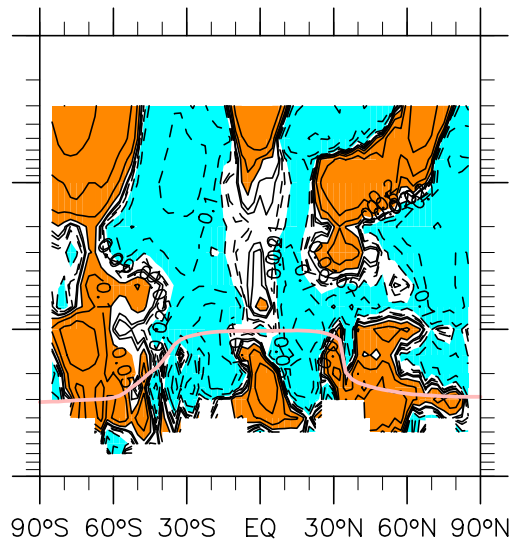

DJF (D80-F10)

(e) SD

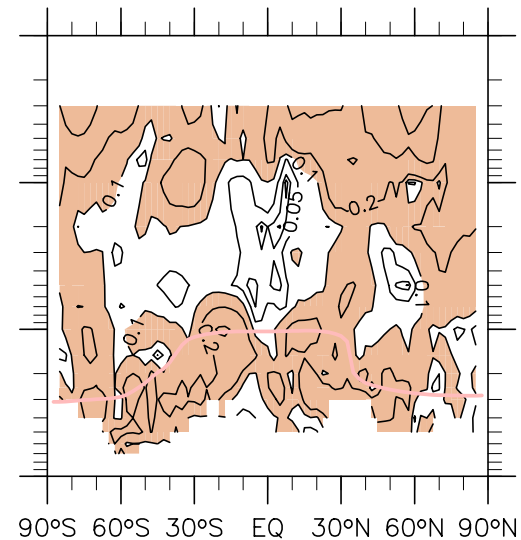

(c) ERA-Int - REM

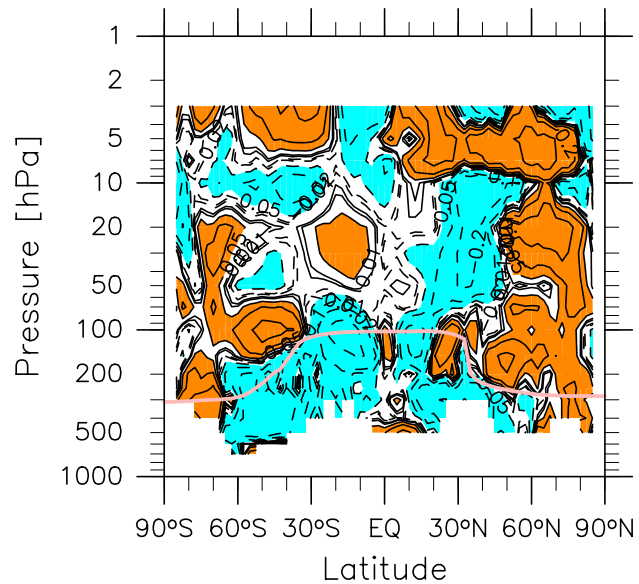

(d) CFSR - REM

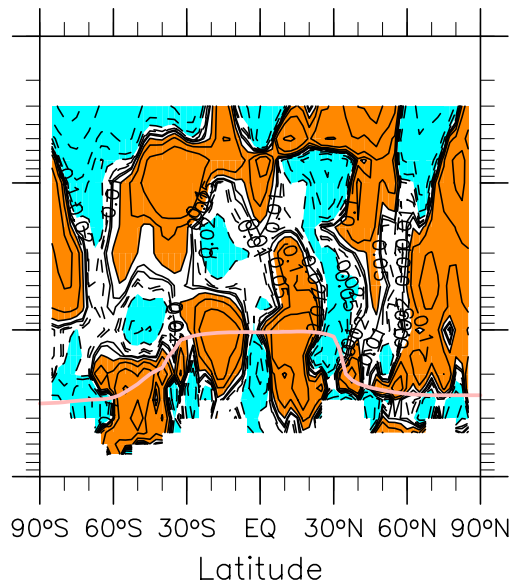

(f) ( SD / | REM | ) x 100%

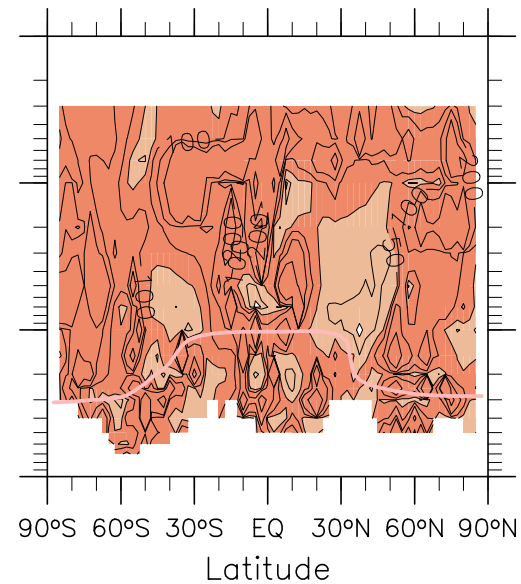

$$-\omega^* \partial\theta/\partial p$$

(a) MERRA-2 - REM

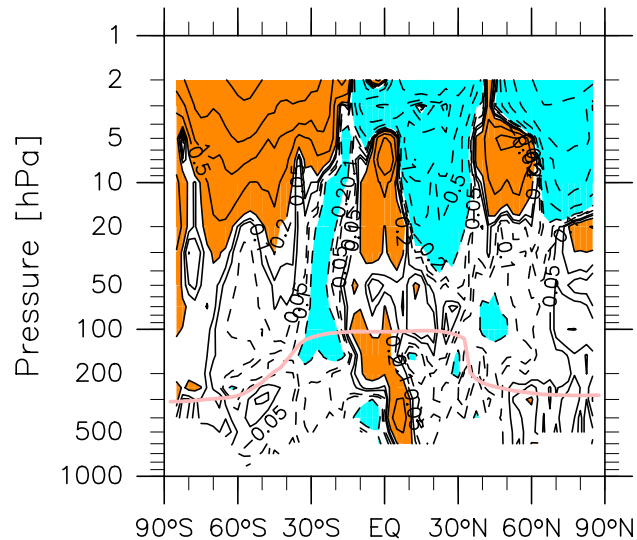

(b) JRA-55 - REM

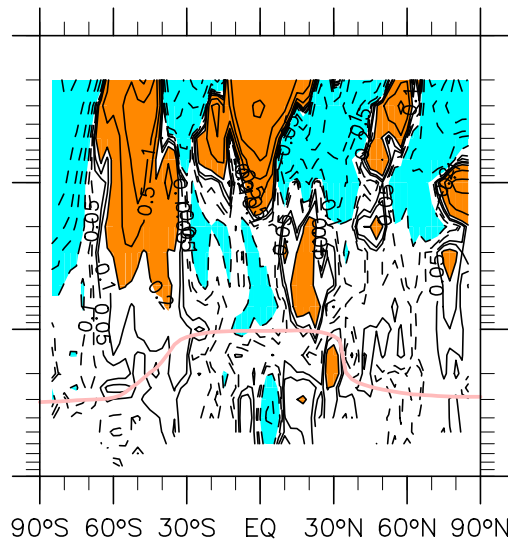

DJF (D80-F10)

(e) SD

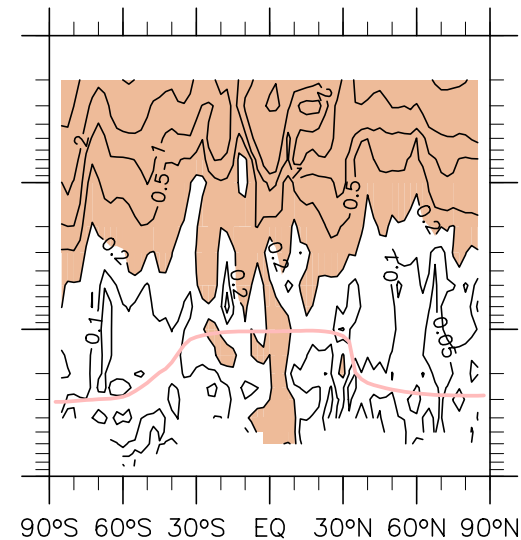

(c) ERA-Int - REM

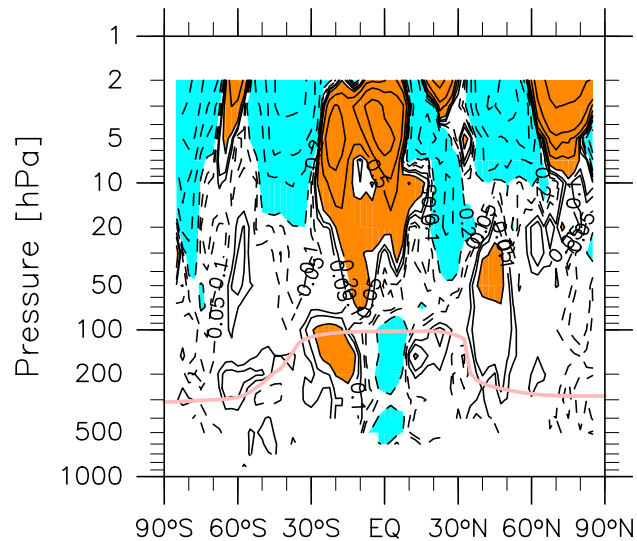

(d) CFSR - REM

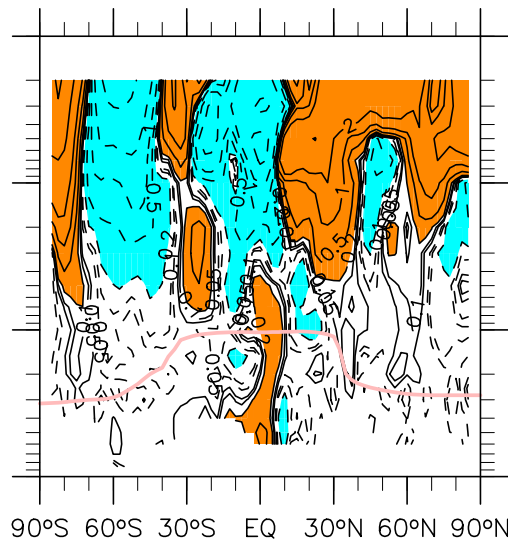

(f) ( SD / | REM | ) x 100%

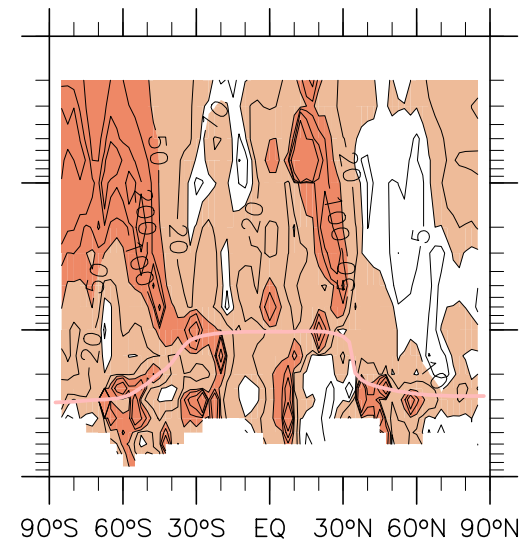

Latitude

Latitude

Latitude

Q<sub>total</sub>

(a) MERRA-2 - REM

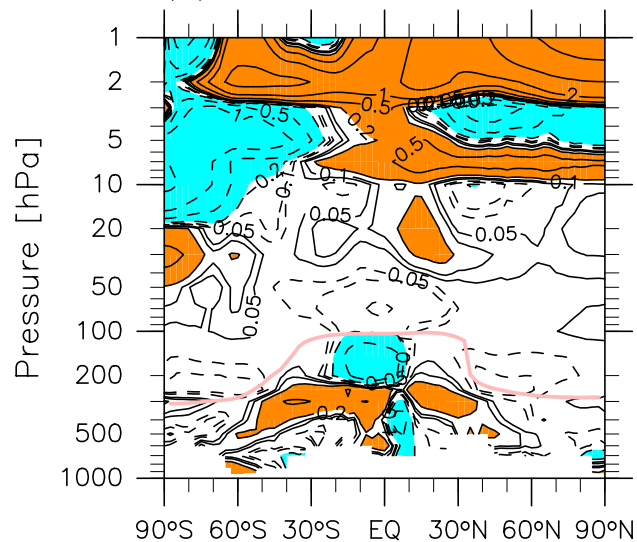

(b) JRA-55 - REM

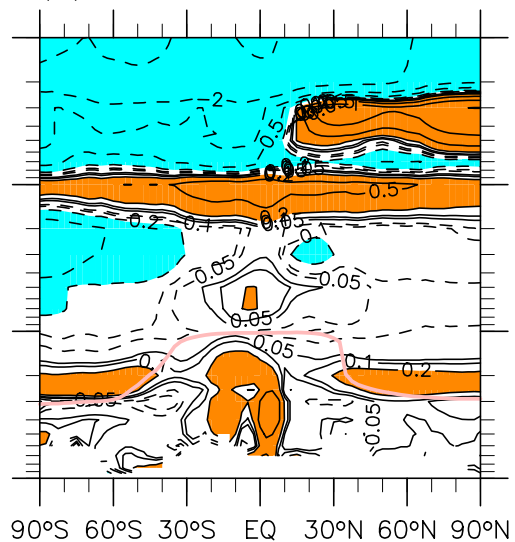

DJF (D80-F10)

(e) SD

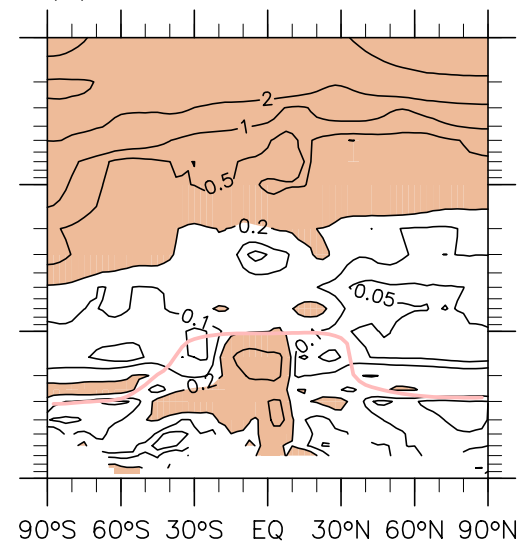

(c) ERA-Int - REM

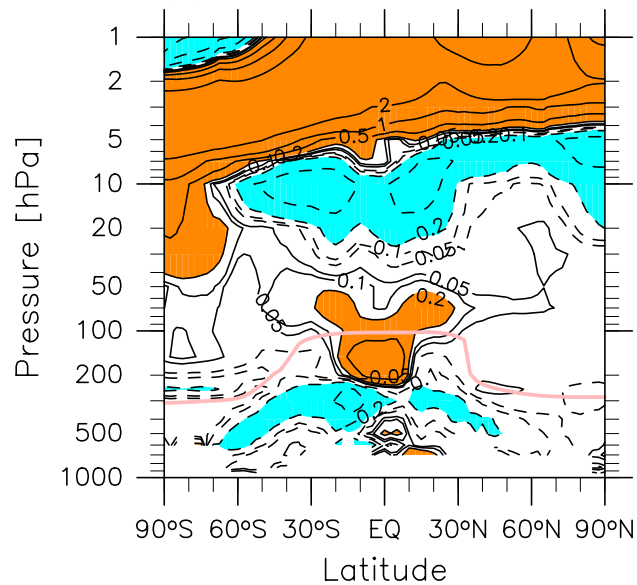

(d) CFSR - REM

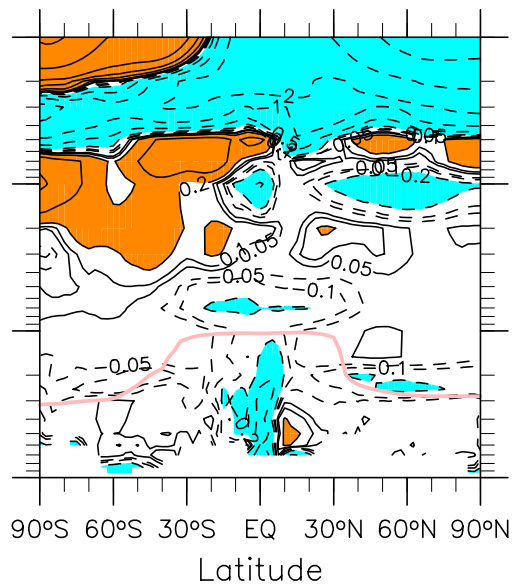

(f) ( SD / | REM | ) x 100%

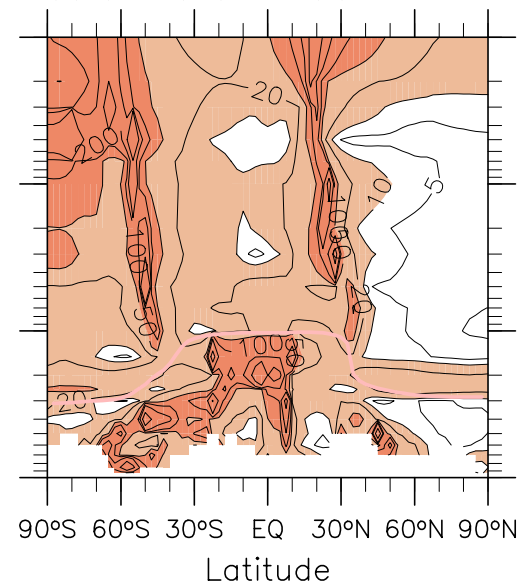



Residual\_Θ

(a) MERRA-2 - REM

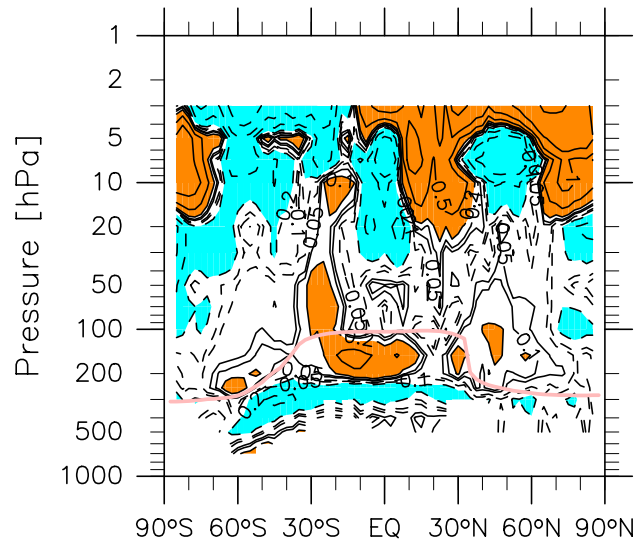

(b) JRA-55 - REM

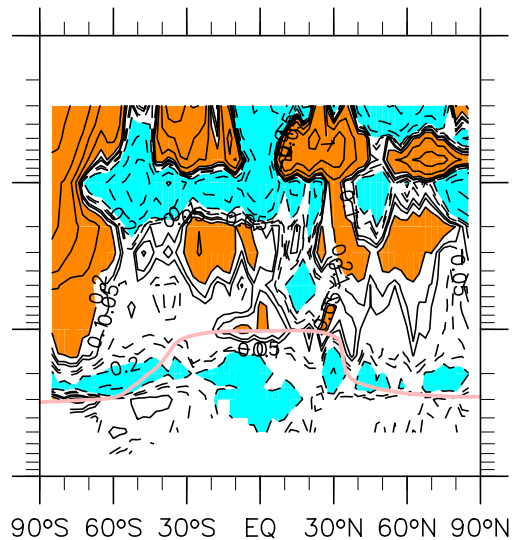

DJF (D80-F10)

(e) SD

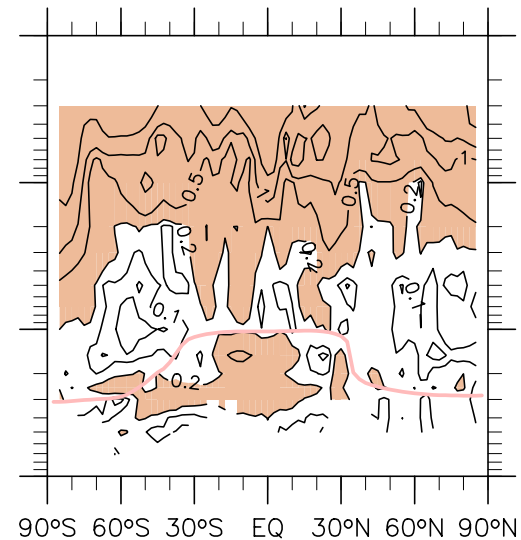

(c) ERA-Int - REM

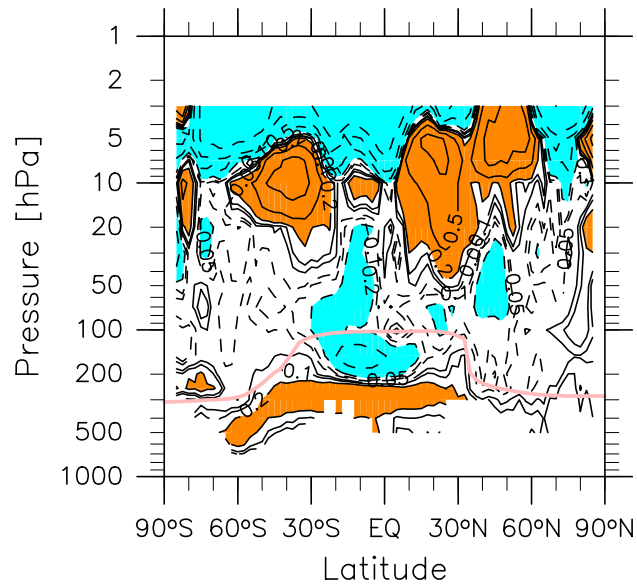

(d) CFSR - REM

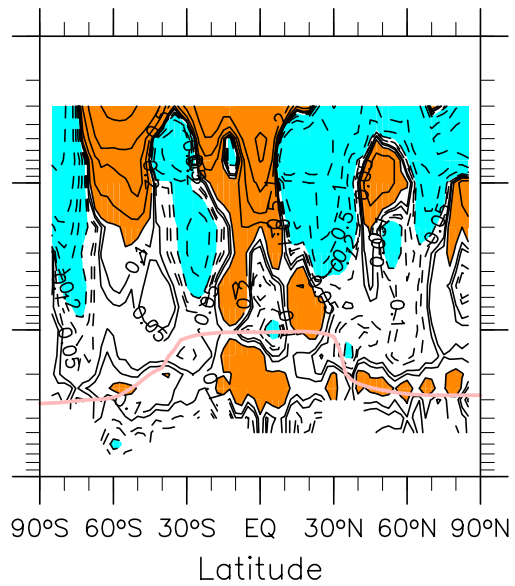

(f) ( SD / | REM | ) x 100%

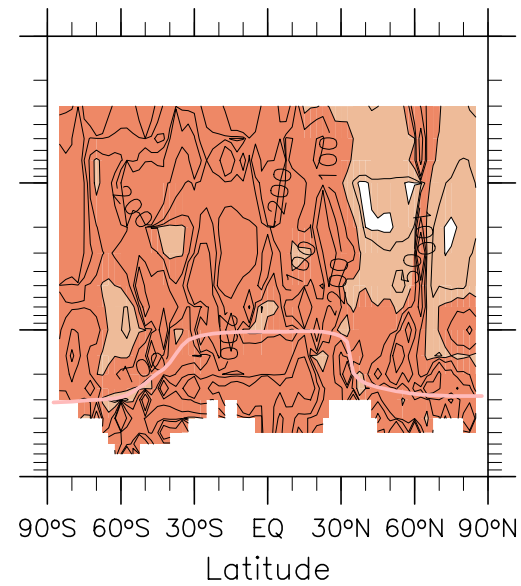

Supplement: Supplementary file 46 [file acp-24-7873-2024-supplement.zip]
