# Supplementary material for: Climatology of the terms and variables of transformed Eulerian-mean (TEM) equations from multiple reanalyses: MERRA-2, JRA-55, ERA-Interim, and CFSR
Source: Copernicus journal article supplement (doi:10.5194/acp-24-7873-2024), 2024-07-10
Supplement: Supplementary file 31 [file acp-24-7873-2024-supplement.zip]

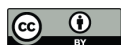

## *Supplement of*

# **Climatology of the terms and variables of transformed Eulerian-mean (TEM) equations from multiple reanalyses: MERRA-2, JRA-55, ERA-Interim, and CFSR**

**Masatomo Fujiwara et al.**

*Correspondence to:* Masatomo Fujiwara (fuji@ees.hokudai.ac.jp)

- acp-24-7873-2024-supplement-title-page.pdf
- Supplement
  - 1.Reanalysis\_Ensemble\_Mean
    - \* REM\_DJF.pdf
    - \* REM\_JJA.pdf
    - \* REM\_MAM.pdf
    - \* REM\_SON.pdf
  - 2.Each\_Reanalysis
    - \* CFSR
    - \* ERA-Interim
    - \* JRA-55
    - \* MERRA-2
  - 3.Comparisons\_for\_major\_variables\_and\_terms
    - \* Comparisons\_DJF.pdf
    - \* Comparisons\_JJA.pdf
    - \* Comparisons\_MAM.pdf
    - \* Comparisons\_SON.pdf
  - 4.Zonal\_accelerations\_due\_to\_parameterizations
    - \* DJF
    - \* JJA
    - \* MAM
    - \* SON
  - README\_Supplement.pdf

The copyright of individual parts of the supplement might differ from the article licence.
