# Supplementary material for: Climatology of the terms and variables of transformed Eulerian-mean (TEM) equations from multiple reanalyses: MERRA-2, JRA-55, ERA-Interim, and CFSR
Source: Copernicus journal article supplement (doi:10.5194/acp-24-7873-2024), 2024-07-10

MAM (81–10)

Zonal Acceleration [m/s/d]

CFSR

(a) All Parameterizations

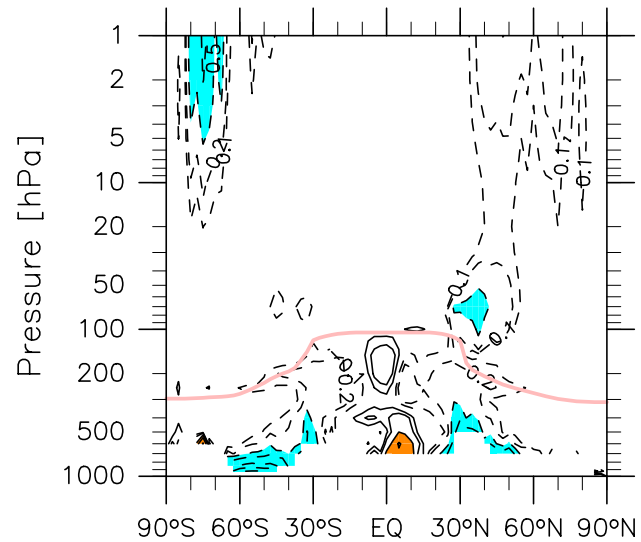

(b) GWD (orographic)

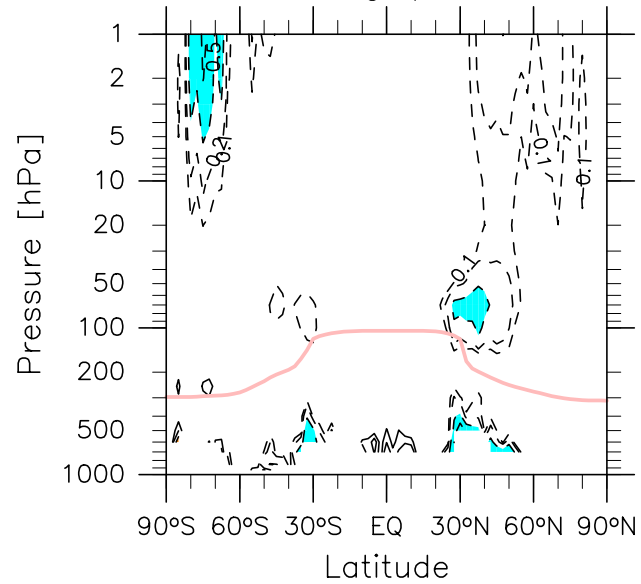

(c) Convective Mixing

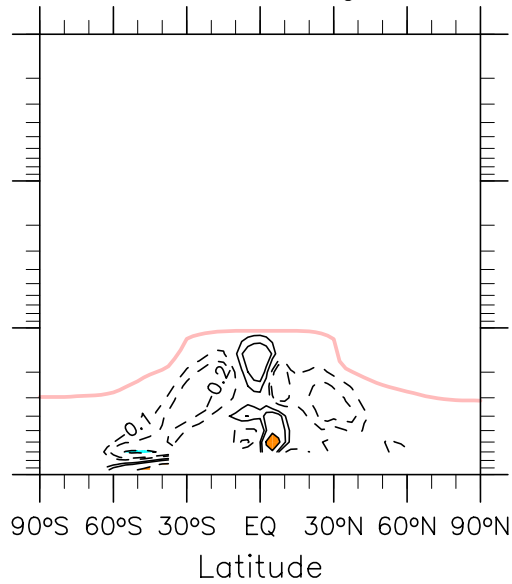

(d) Vertical Diffusion

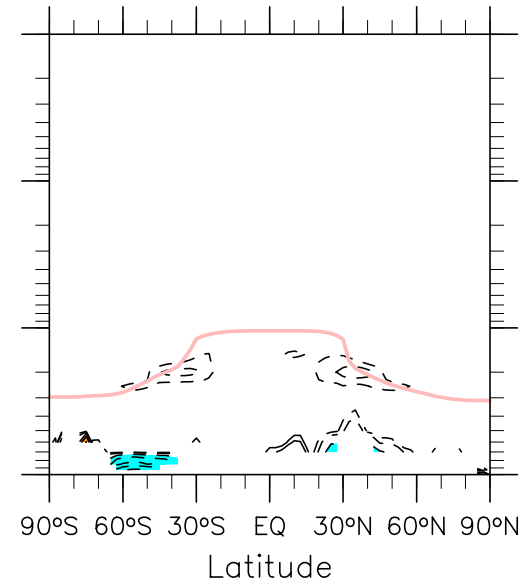

Supplement: Supplementary file 45 [file acp-24-7873-2024-supplement.zip]
