# Supplementary figures and images for: Climatology of the terms and variables of transformed Eulerian-mean (TEM) equations from multiple reanalyses: MERRA-2, JRA-55, ERA-Interim, and CFSR
Source: Copernicus journal article supplement (doi:10.5194/acp-24-7873-2024), 2024-07-10

MAM (81–10)

Zonal Acceleration [m/s/d]

ERA–Interim

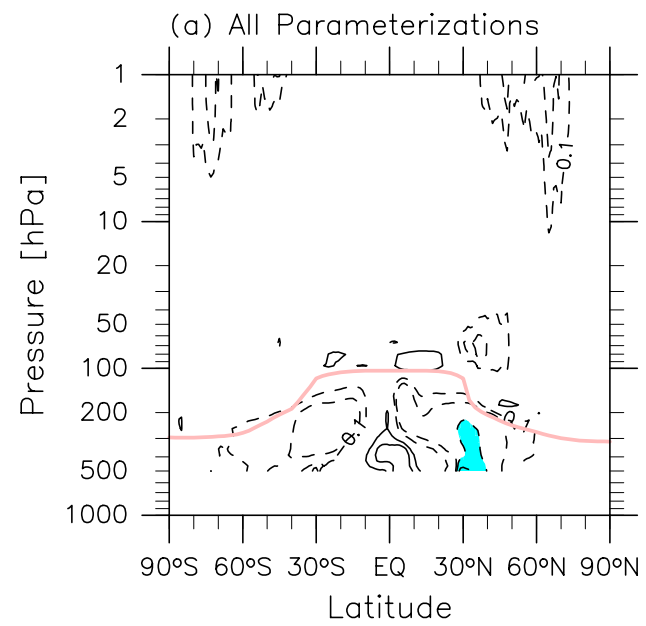

Supplement: Supplementary file 3 [file acp-24-7873-2024-supplement.zip]

JJA (81–10)

Zonal Acceleration [m/s/d]

JRA-55

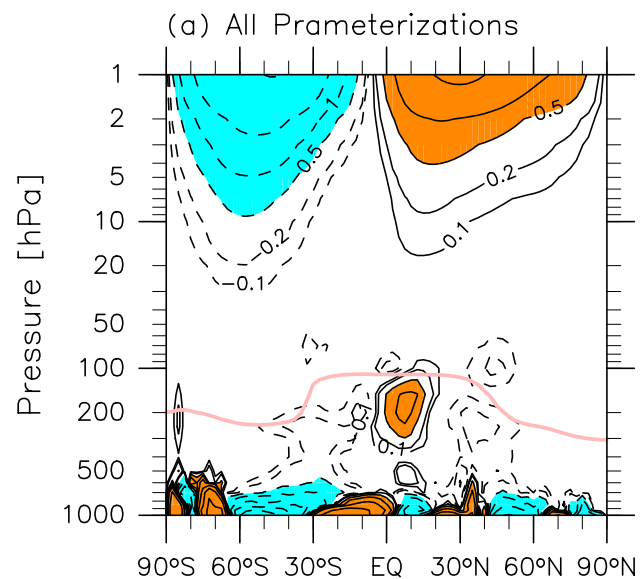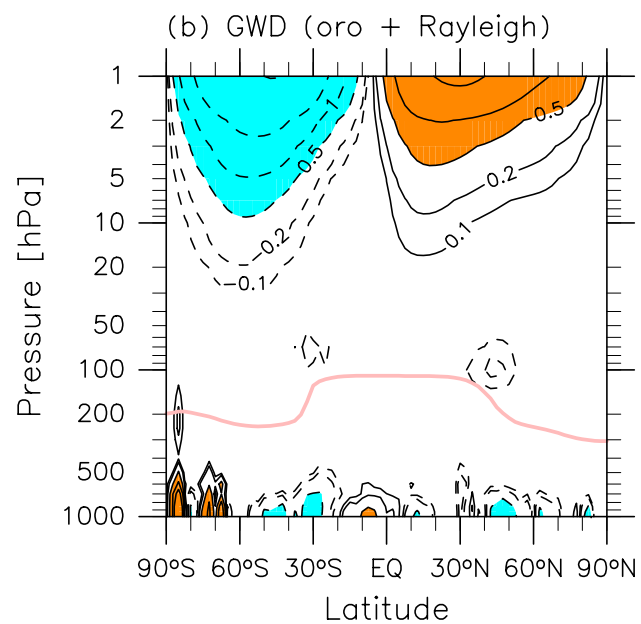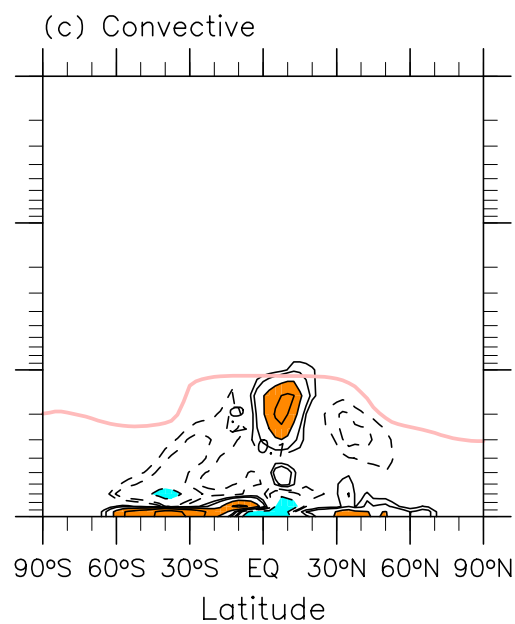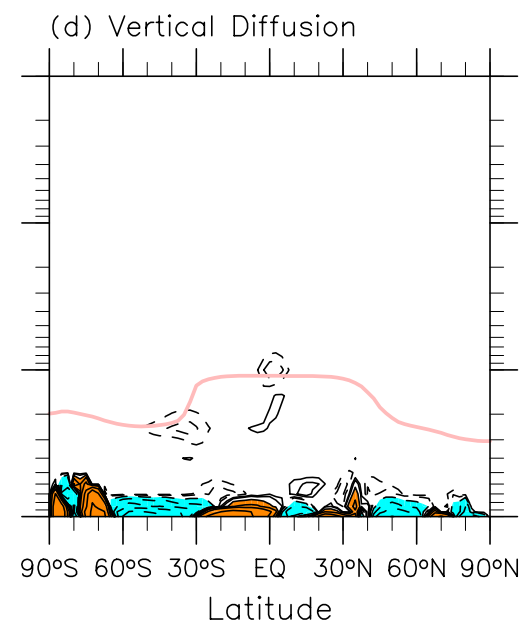

Supplement: Supplementary file 10 [file acp-24-7873-2024-supplement.zip]

JJA (81–10)

Zonal Acceleration [m/s/d]

MERRA-2

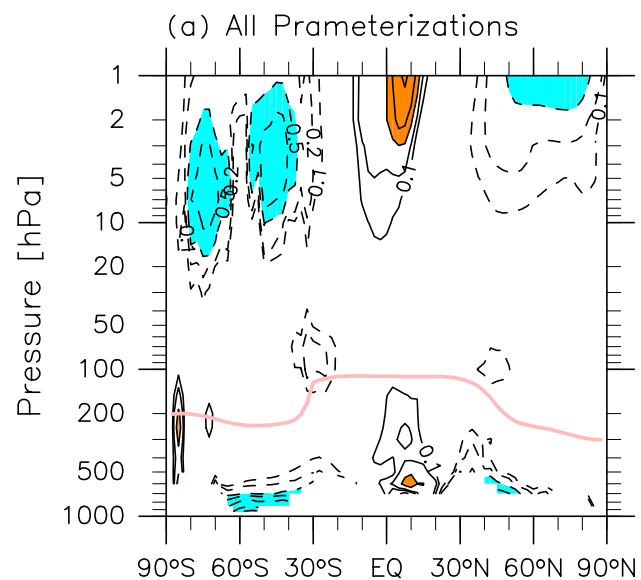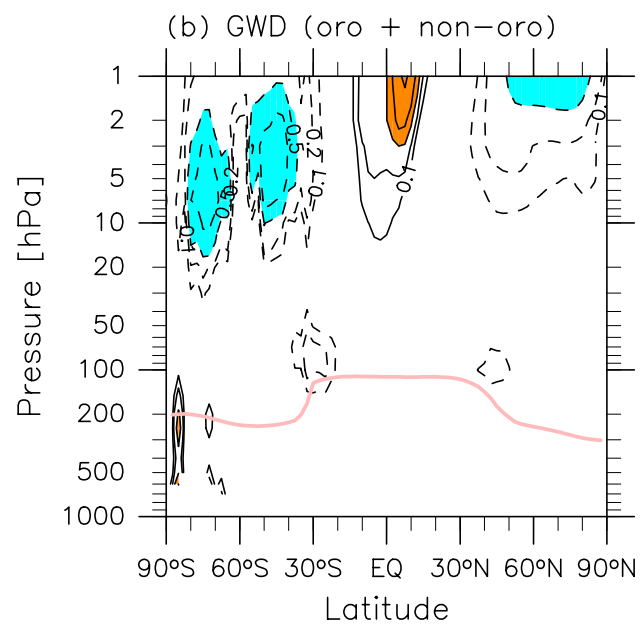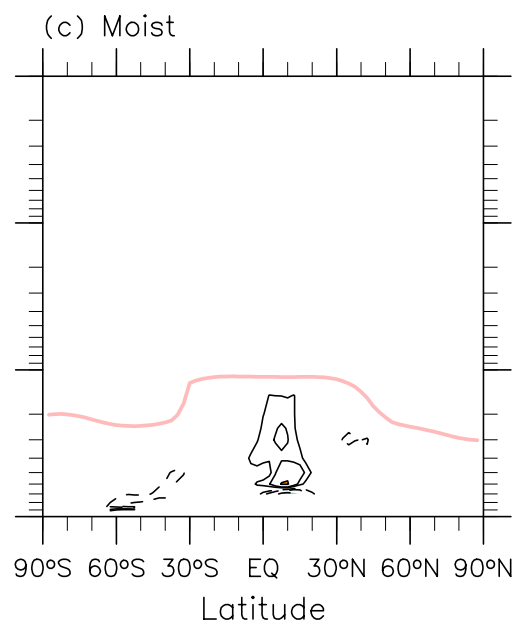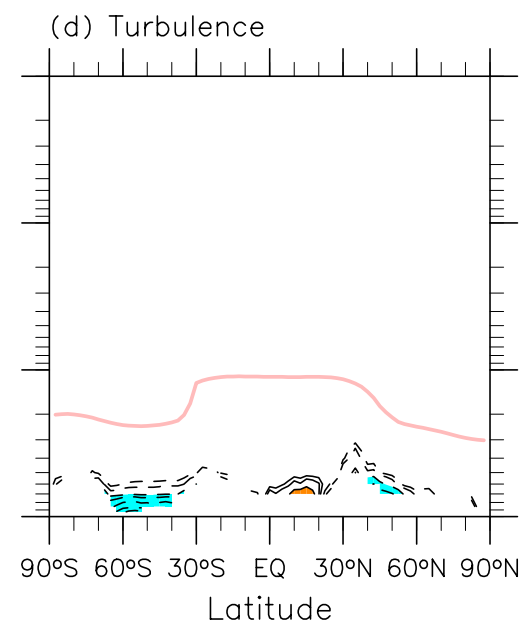

Supplement: Supplementary file 13 [file acp-24-7873-2024-supplement.zip]

SON (81–10)

Zonal Acceleration [m/s/d]

ERA–Interim

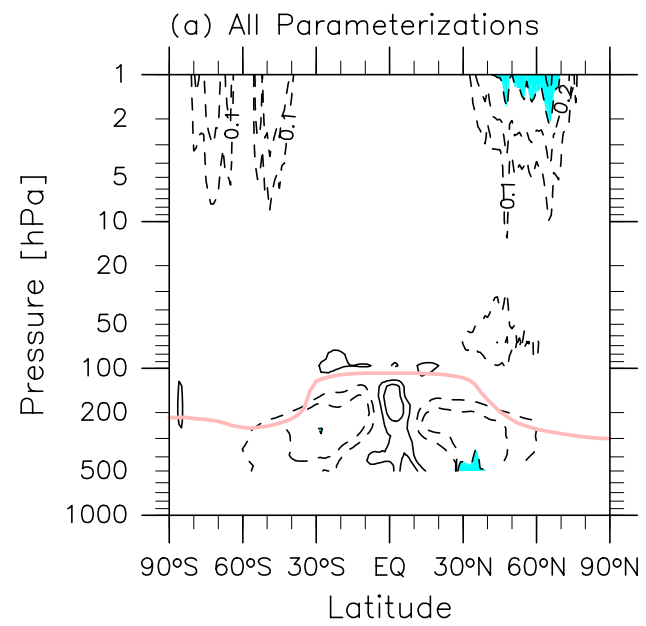

Supplement: Supplementary file 21 [file acp-24-7873-2024-supplement.zip]

JJA (81–10)

Zonal Acceleration [m/s/d]

ERA–Interim

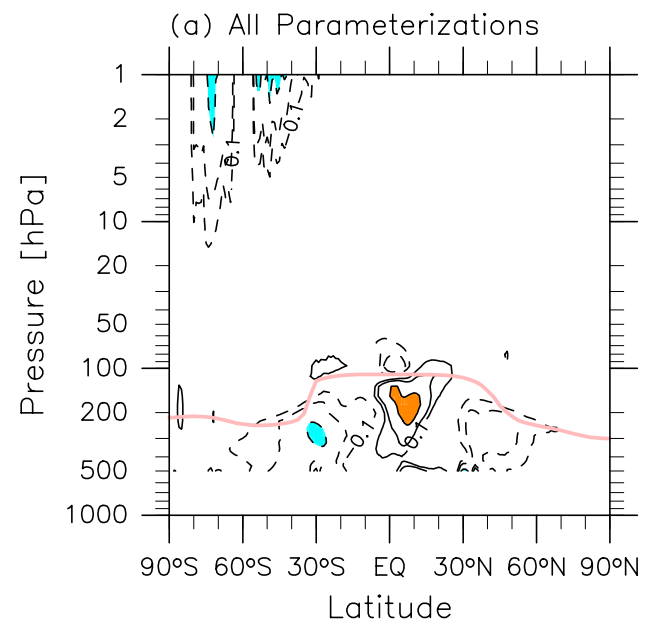

Supplement: Supplementary file 23 [file acp-24-7873-2024-supplement.zip]

DJF (D80–F10)

Zonal Acceleration [m/s/d]

JRA–55

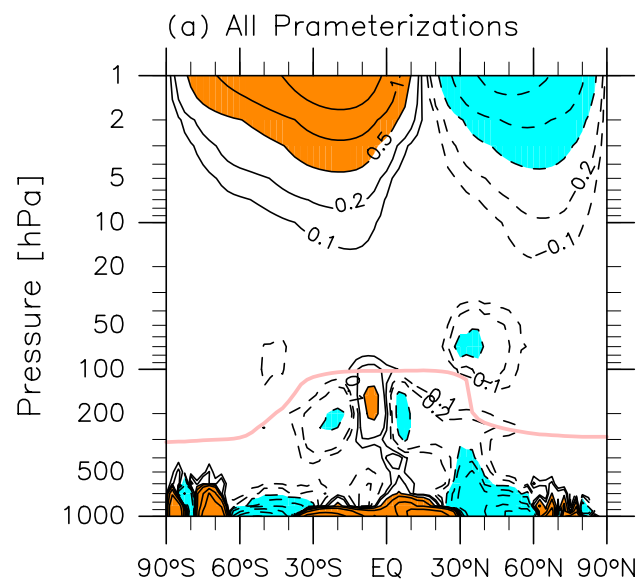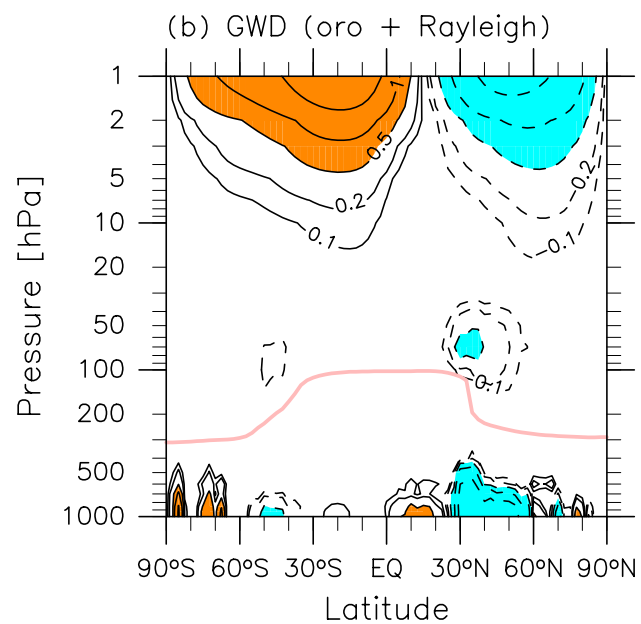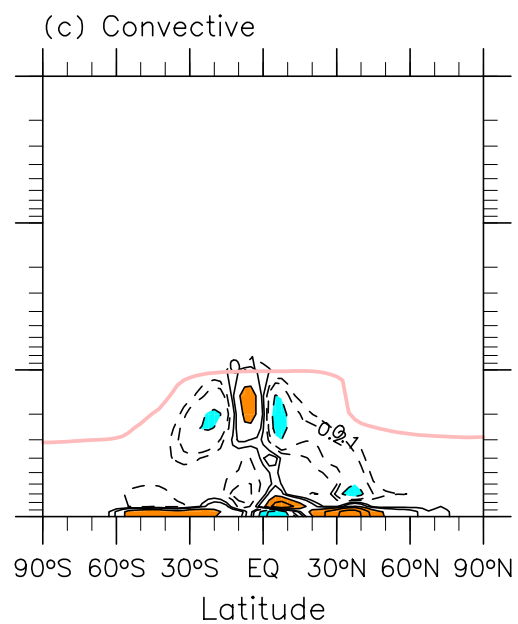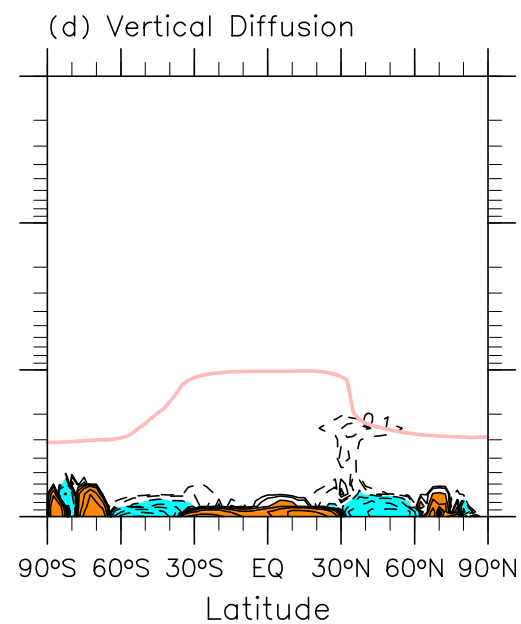

Supplement: Supplementary file 25 [file acp-24-7873-2024-supplement.zip]

MAM (81–10)

Zonal Acceleration [m/s/d]

JRA-55

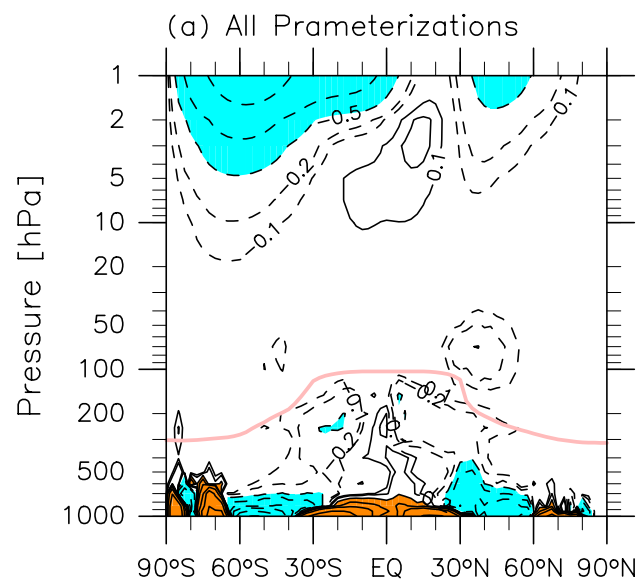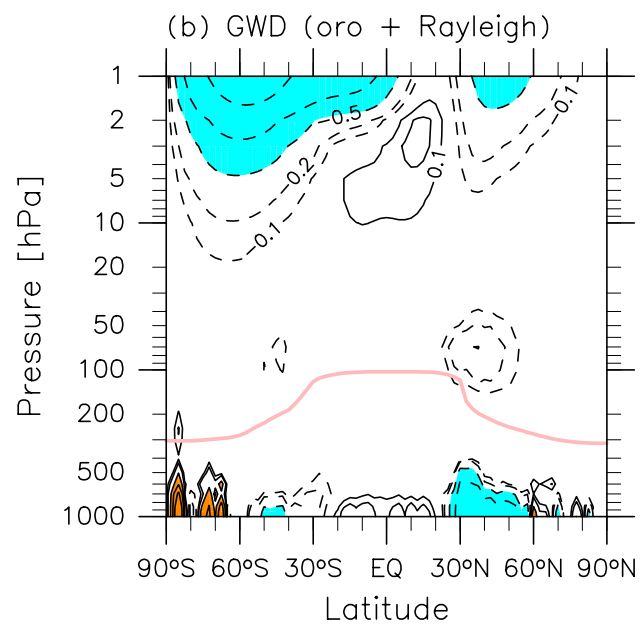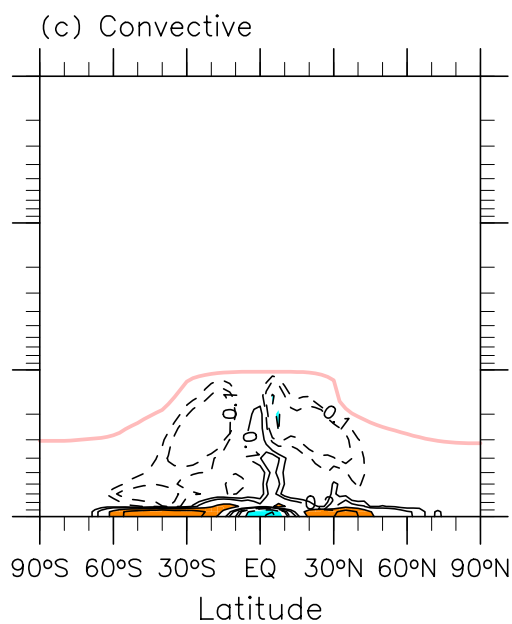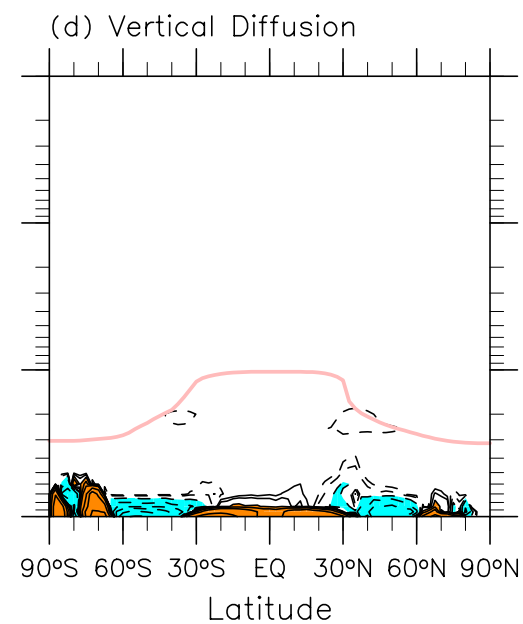

Supplement: Supplementary file 27 [file acp-24-7873-2024-supplement.zip]

SON (81–10)

Zonal Acceleration [m/s/d]

MERRA-2

(a) All Parameterizations

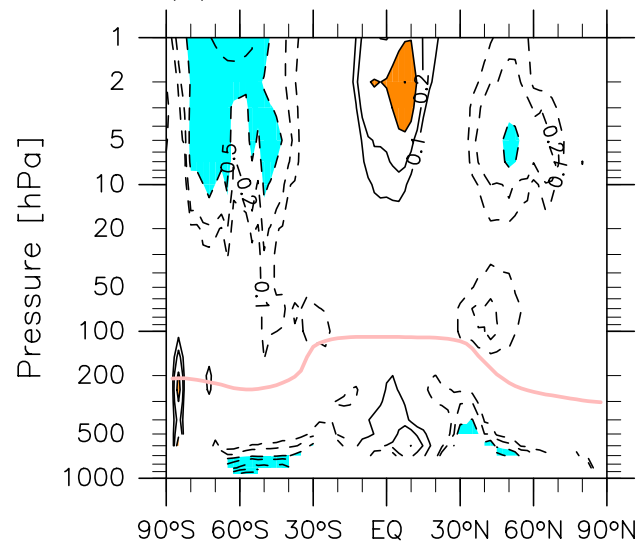

(b) GWD (oro + non-oro)

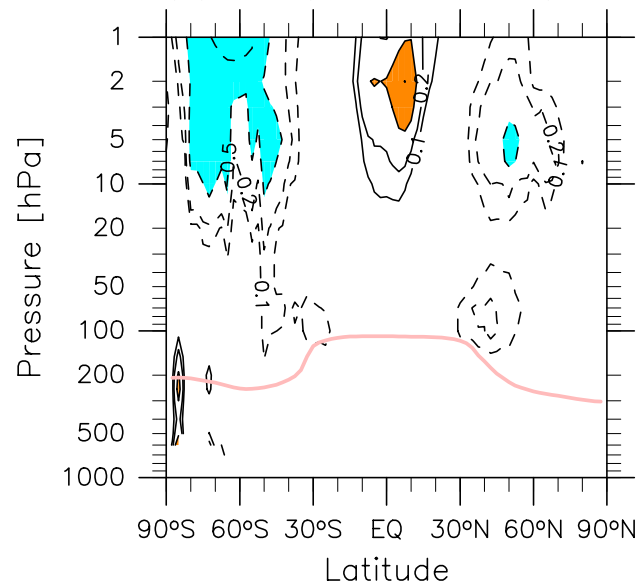

(c) Moist

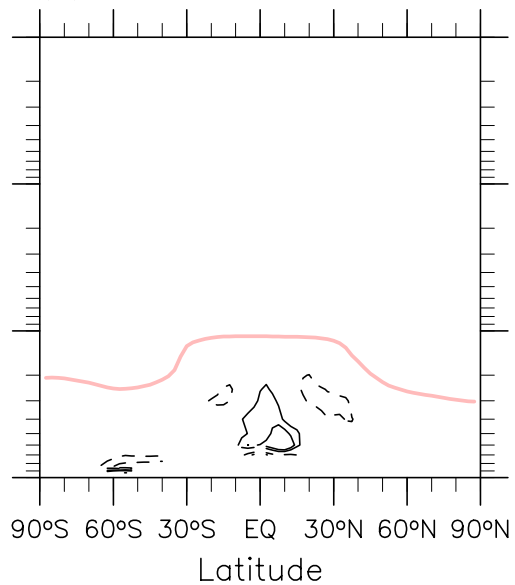

(d) Turbulence

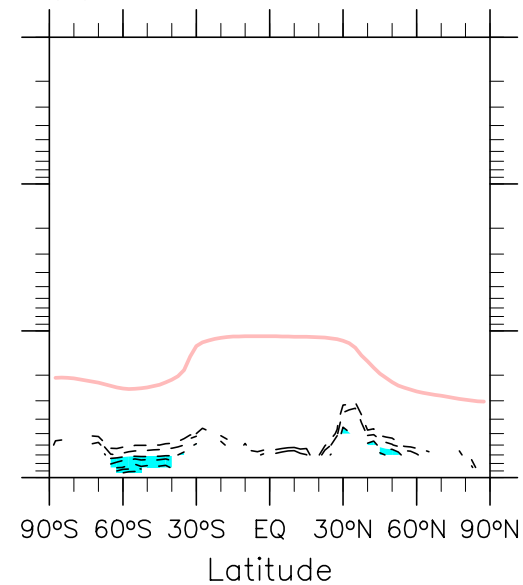

Supplement: Supplementary file 29 [file acp-24-7873-2024-supplement.zip]

DJF (D80–F10)

Zonal Acceleration [m/s/d]

ERA–Interim

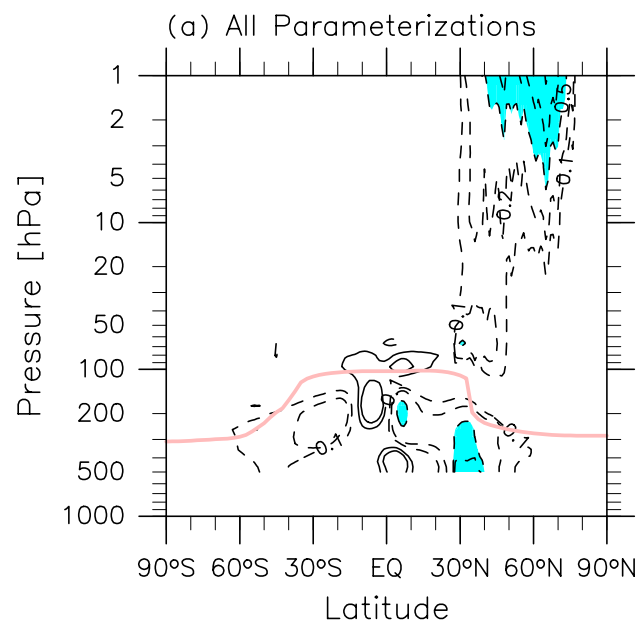

Supplement: Supplementary file 38 [file acp-24-7873-2024-supplement.zip]

SON (81–10)

Zonal Acceleration [m/s/d]

JRA-55

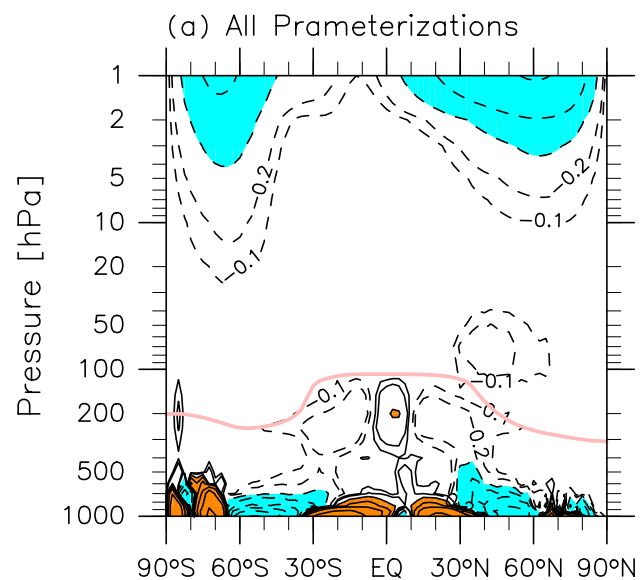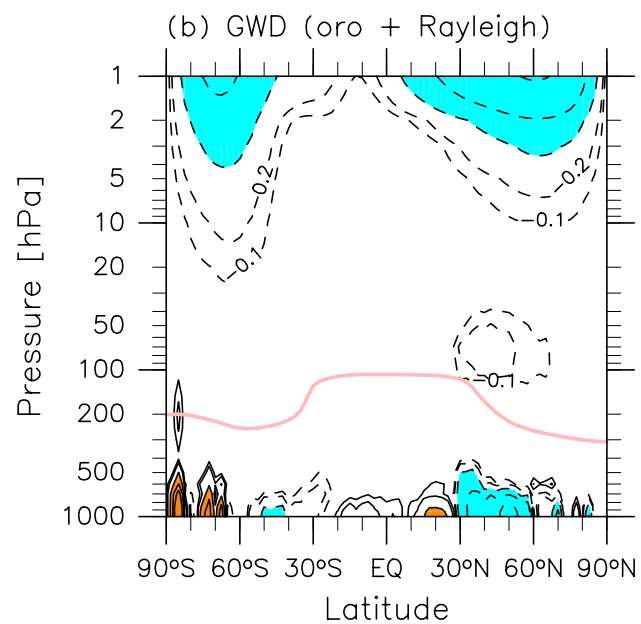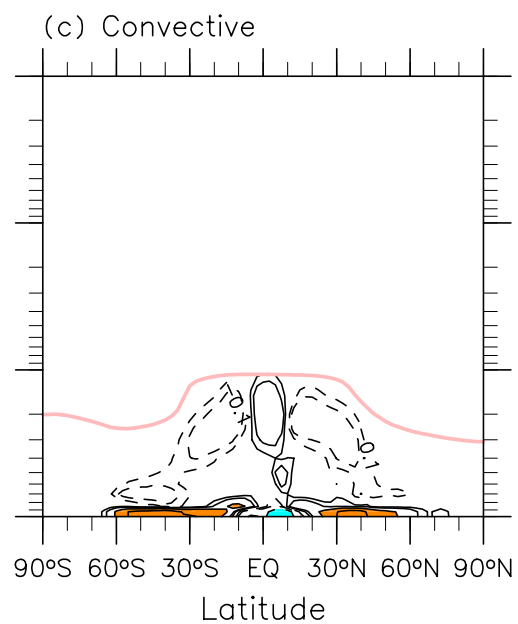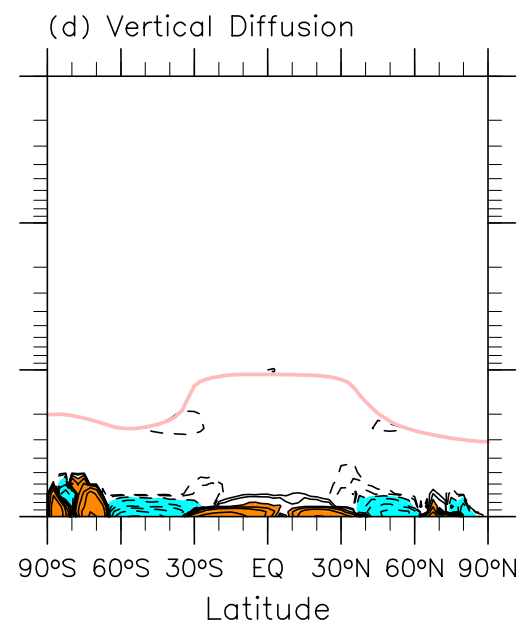

Supplement: Supplementary file 40 [file acp-24-7873-2024-supplement.zip]

MAM (81–10)

Zonal Acceleration [m/s/d]

MERRA-2

(a) All Parameterizations

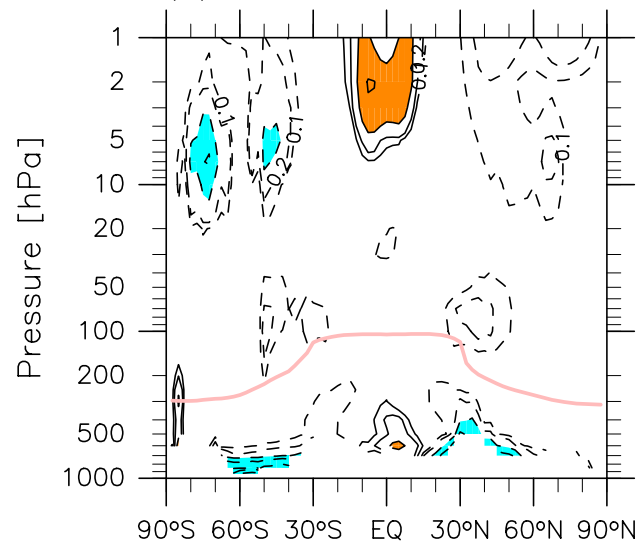

(b) GWD (oro + non-oro)

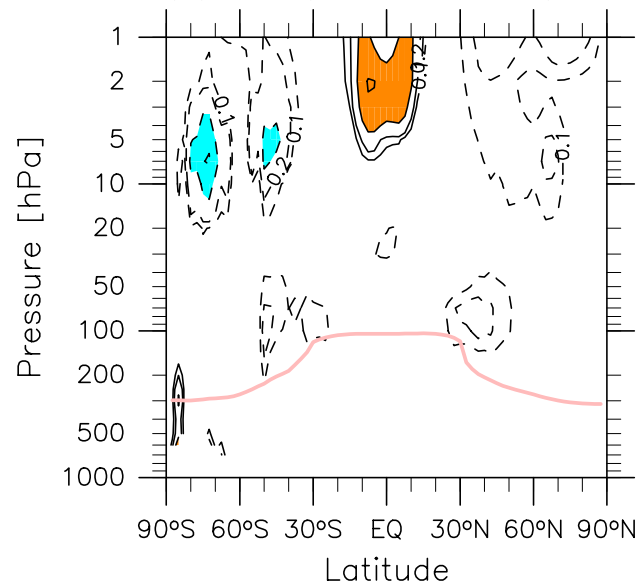

(c) Moist

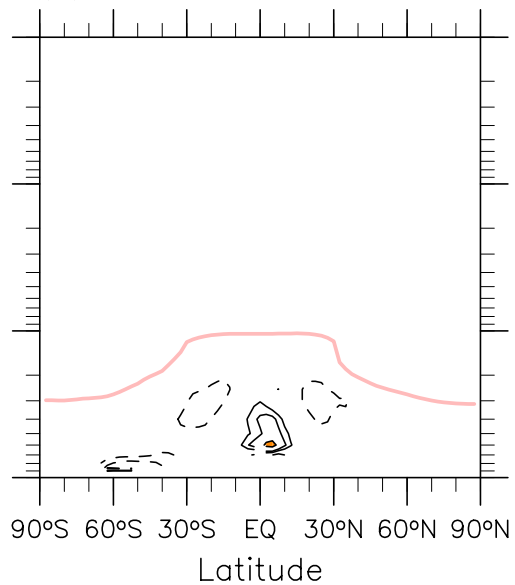

(d) Turbulence

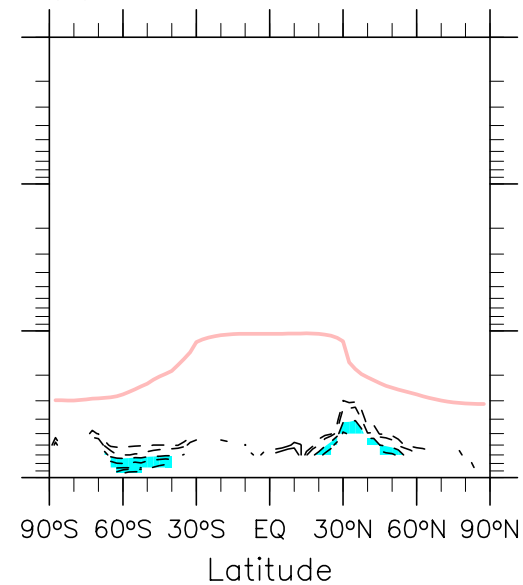

Supplement: Supplementary file 50 [file acp-24-7873-2024-supplement.zip]
